# Supplementary material for: Transcriptome Analysis Reveals Mycelial and Fruiting Responses to Lithium Chloride in Coprinopsis cinerea
Source: MDPI journal article supplement (doi:10.3390/jof10020140), 2024-02-09
Supplement: s1 [file s1]

**Table S1. Primers designed for validation of gene expression profile in *C. cinerea* transcriptome data**

| <b>Primer ID</b> | <b>Primer sequences (5' to 3')</b> | <b>Amplicon size</b> |
|------------------|------------------------------------|----------------------|
| CC1G_07486FP     | AGACGCGACGGACTACTTTC               | 101bp                |
| CC1G_07486RP     | TAGTGCCCTGGGTTCATACG               |                      |
| CC1G_04403FP     | AAGGTGGTCTTTGCCACAA                | 99bp                 |
| CC1G_04403RP     | CCACCACGATCAACTGACGA               |                      |
| CC1G_09477FP     | ATGTCGCGACGGATTCTAC                | 99bp                 |
| CC1G_09477RP     | ATTGCGGACCAGGAGATGGA               |                      |
| CC1G_00058FP     | TCCTGCTACGTGGCAAATGA               | 100bp                |
| CC1G_00058RP     | TGGATCATCGACGCATGGTT               |                      |
| CC1G_00407FP     | TTCAGTCACGCGTAGGGAAG               | 123bp                |
| CC1G_00407RP     | AACAGTTCTCCGCTTGTCCC               |                      |
| CC1G_15600FP     | CCTGGCAGTGTTGAAGACCC               | 161bp                |
| CC1G_15600RP     | CCGATGAGACCATGCAGAAGA              |                      |
| CC1G_10354FP     | TCGTTGATCACGTCAGTGGAA              | 144bp                |
| CC1G_10354RP     | ACGGGTACGGATGGAGACT                |                      |
| CC1G_09588FP     | TTAGGCGCGTGCCATTCAAG               | 105bp                |
| CC1G_09588RP     | TATCCCTGAGCGAACGACAC               |                      |
| CC1G_00620FP     | CCATTGACCGACGACCCTAC               | 96bp                 |
| CC1G_00620RP     | TACGCCGATGGAGACACAGA               |                      |
| CC1G_01088FP     | AGCGCTGAGGAAGCAGAAAA               | 101bp                |
| CC1G_01088RP     | GCTCGTCGTCTGGATCACTT               |                      |
| Beta-tubulin_FP  | GAGCAGTCCTGGTTGACCTC               | 130bp                |
| Beta-tubulin_RP  | TGTCCTTTGGCCCAGTTGTT               |                      |

FP: forward primer; RP: reverse primer.
