# Supplementary material for: Transcriptome Analysis Reveals Mycelial and Fruiting Responses to Lithium Chloride in Coprinopsis cinerea
Source: MDPI journal article supplement (doi:10.3390/jof10020140), 2024-02-09
Supplement: s1 [file s1]

**Table S3. KEGG enrichment between different samples (p-value  $\leq$  0.05).**

| Pathway                                               | Class                   | Group                          | p-value     | FDR         |
|-------------------------------------------------------|-------------------------|--------------------------------|-------------|-------------|
| <b>KEGG enrichment in LM1/HM-UP and LM1/HM-DOWN</b>   |                         |                                |             |             |
| Biosynthesis of secondary metabolites                 | Overview                | Metabolism                     | 6.70E-12    | 4.02E-10    |
| Starch and sucrose metabolism                         | Carbohydrate metabolism | Metabolism                     | 6.00E-05    | 0.001800386 |
| Biosynthesis of antibiotics                           | Overview                | Metabolism                     | 0.000767646 | 0.015352915 |
| Glycerophospholipid metabolism                        | Lipid metabolism        | Metabolism                     | 0.002272296 | 0.027543139 |
| Tyrosine metabolism                                   | Amino acid metabolism   | Metabolism                     | 0.002295262 | 0.027543139 |
| Pyruvate metabolism                                   | Carbohydrate metabolism | Metabolism                     | 0.001327923 | 0.018171584 |
| <b>KEGG enrichment in LM2/HHK-UP and LM2/HHK-DOWN</b> |                         |                                |             |             |
| Steroid biosynthesis                                  | Lipid metabolism        | Metabolism cellular            | 1.91E-05    | 0.00059773  |
| Cell cycle - yeast                                    | Cell growth and death   | processes cellular             | 1.99E-05    | 0.00059773  |
| DNA replication                                       | Replication and repair  | processes cellular             | 0.000596357 | 0.011927147 |
| Meiosis - yeast                                       | Cell growth and death   | processes cellular             | 0.003380868 | 0.032617563 |
| Mismatch repair                                       | Replication and repair  | processes cellular             | 0.003805382 | 0.032617563 |
| Homologous recombination                              | Replication and repair  | processes Genetic              | 0.003805382 | 0.032617563 |
| Nucleotide excision repair                            | Replication and repair  | Information Processing         | 0.005998159 | 0.037922575 |
| Base excision repair                                  | Replication and repair  | Genetic Information Processing | 0.006466285 | 0.037922575 |
