# Supplementary material for: Transcriptome Analysis Reveals Mycelial and Fruiting Responses to Lithium Chloride in Coprinopsis cinerea
Source: MDPI journal article supplement (doi:10.3390/jof10020140), 2024-02-09
Supplement: s1 [file s1]

**Table S5. Downregulated DEGs involved in KEGG enriched pathways between LM2 and HHM.**

| Gene ID    | JGI Protein ID | LM2 FPKM | HHK FPKM | Log2 fold change | Gene Description                                      | Cellular processes pathway | P-value  |
|------------|----------------|----------|----------|------------------|-------------------------------------------------------|----------------------------|----------|
| CC1G_03033 | 498847         | 10.61    | 22.56    | -1.09            | Other/TTK protein kinase                              | Cell cycle - yeast         | 5.00E-05 |
| CC1G_03603 | 471912         | 2.41     | 8.53     | -1.82            | Hypothetical protein                                  |                            | 5.00E-05 |
| CC1G_03913 | 460017         | 7.35     | 24.97    | -1.76            | Tyrosine phosphatase                                  |                            | 5.00E-05 |
| CC1G_05127 | 461884         | 5.77     | 13.75    | -1.25            | Rad21 protein                                         |                            | 5.00E-05 |
| CC1G_05320 | 493180         | 25.65    | 65.30    | -1.35            | G2/mitotic-specific cyclin cdc13                      |                            | 5.00E-05 |
| CC1G_05699 | 448884         | 10.95    | 23.36    | -1.09            | Condensin complex component cnd2                      |                            | 5.00E-05 |
| CC1G_12491 | 466770         | 8.86     | 23.65    | -1.42            | Nuclear condensin complex protein                     |                            | 5.00E-05 |
| CC1G_13763 | 498107         | 12.86    | 27.30    | -1.09            | Hypothetical protein                                  |                            | 5.00E-05 |
| CC1G_13764 | 371091         | 7.59     | 19.34    | -1.35            | Smc4 chromosome structural maintenance 4-like protein |                            | 5.00E-05 |
| CC1G_04539 | 182474         | 4.06     | 16.15    | -1.99            | Hypothetical protein                                  | DNA replication            | 5.00E-05 |
| CC1G_05722 | 439189         | 8.16     | 18.48    | -1.18            | DNA polymerase alpha catalytic subunit                |                            | 5.00E-05 |
| CC1G_09909 | 359386         | 3.88     | 11.45    | -1.56            | DNA polymerase epsilon catalytic subunit A            |                            | 5.00E-05 |
| CC1G_11474 | 500550         | 1.11     | 4.38     | -1.98            | DNA replication helicase dna2                         |                            | 5.00E-05 |
| CC1G_11942 | 442128         | 8.05     | 19.73    | -1.29            | DNA primase large subunit Spp2                        |                            | 5.00E-05 |
| CC1G_02333 | 541864         | 3.51     | 10.39    | -1.57            | Hypothetical protein                                  | Homologous recombination   | 5.00E-05 |
| CC1G_06567 | 533614         | 4.53     | 10.45    | -1.21            | Hypothetical protein                                  |                            | 5.00E-05 |
| CC1G_07448 | 374046         | 4.78     | 14.41    | -1.59            | ATP-dependent DNA helicase                            |                            | 5.00E-05 |
| CC1G_07736 | 364090         | 6.07     | 15.87    | -1.39            | RAD52 DNA repair protein RAD52                        |                            | 5.00E-05 |
| CC1G_14217 | 441663         | 1.85     | 7.19     | -1.96            | RAD54B protein                                        |                            | 5.00E-05 |
| CC1G_01089 | 465387         | 1.75     | 4.82     | -1.46            | AGC/PKA protein kinase                                | Meiosis - yeast            | 0.00025  |
| CC1G_05221 | 474965         | 4.61     | 20.55    | -2.16            | DNA mismatch repair protein MSH2                      | Mismatch repair            | 5.00E-05 |
| CC1G_07657 | 538972         | 10.99    | 22.71    | -1.05            | DNA mismatch repair protein msh6                      |                            | 5.00E-05 |
| CC1G_00769 | 173502         | 4.24     | 10.70    | -1.34            | Origin recognition complex subunit 4                  |                            | 5.00E-05 |

|            |        |       |       |       |                                       |                                                                         |          |
|------------|--------|-------|-------|-------|---------------------------------------|-------------------------------------------------------------------------|----------|
| CC1G_09412 | 175000 | 3.84  | 11.70 | -1.61 | Cell division cycle 20 family protein | Cell cycle -<br>yeast Meiosis<br>- yeast                                | 5.00E-05 |
| CC1G_12115 | 439328 | 10.48 | 24.94 | -1.25 | WD repeat-containing protein slp1     |                                                                         | 5.00E-05 |
| CC1G_01961 | 445594 | 6.12  | 23.67 | -1.95 | Other/WEE protein kinase              |                                                                         | 5.00E-05 |
| CC1G_03323 | 393199 | 7.83  | 22.17 | -1.50 | Cdc6B protein                         |                                                                         | 5.00E-05 |
| CC1G_04503 | 449605 | 4.68  | 12.41 | -1.41 | Replication control protein 1         |                                                                         | 5.00E-05 |
| CC1G_05095 | 373206 | 4.60  | 12.74 | -1.47 | Cell division control protein 45      |                                                                         | 5.00E-05 |
| CC1G_06464 | 379954 | 1.52  | 3.16  | -1.06 | Hypothetical protein                  |                                                                         | 0.00565  |
| CC1G_07078 | 490518 | 8.29  | 17.83 | -1.11 | Other/BUB protein kinase              |                                                                         | 0.00405  |
| CC1G_08833 | 354027 | 3.14  | 7.34  | -1.22 | Other/CDC7 protein kinase             | DNA<br>replication<br>Mismatch<br>repair<br>Homologous<br>recombination | 5.00E-05 |
| CC1G_05633 | 545958 | 26.09 | 58.39 | -1.16 | PCNA                                  |                                                                         | 5.00E-05 |
| CC1G_10825 | 394368 | 6.40  | 15.59 | -1.28 | Replication factor C                  |                                                                         | 5.00E-05 |
| CC1G_00877 | 516390 | 8.63  | 22.49 | -1.38 | DNA replication factor                |                                                                         | 5.00E-05 |
| CC1G_11689 | 377250 | 0.89  | 2.59  | -1.54 | Hypothetical protein                  |                                                                         | 0.0079   |
| CC1G_00910 | 493516 | 7.53  | 18.17 | -1.27 | Hypothetical protein                  |                                                                         | 5.00E-05 |
