# Supplementary material for: Transcriptome Analysis Reveals Mycelial and Fruiting Responses to Lithium Chloride in Coprinopsis cinerea
Source: MDPI journal article supplement (doi:10.3390/jof10020140), 2024-02-09
Supplement: s1 [file s1]

**Table S6. The downregulated expression gene of fruiting body induction based on RNA-seq analysis.**

| Gene ID    | JGI Protein ID | LM2 FPKM | HHK FPKM | Log2 fold change | Gene Description                                            | KOG ID  | KOG description                                       | P-value  |
|------------|----------------|----------|----------|------------------|-------------------------------------------------------------|---------|-------------------------------------------------------|----------|
| CC1G_06860 | 442684         | 87.06    | 110.00   | -0.34            | Phosphatidate cytidyltransferase                            | KOG1440 | CDP-diacylglycerol synthase                           | 0.01085  |
| CC1G_09235 | 178424         | 63.08    | 819.58   | -3.70            | Hypothetical protein                                        | KOG2419 | Phosphatidylserine decarboxylase                      | 5.00E-05 |
| CC1G_06249 | 361342         | 25.02    | 207.27   | -3.05            | Phosphatidylserine decarboxylase                            |         |                                                       | 5.00E-05 |
| CC1G_09238 | 457157         | 1.43     | 38.82    | -4.76            |                                                             |         |                                                       | 5.00E-05 |
| CC1G_09240 | 178286         | 694.73   | 3077.27  | -2.15            |                                                             |         |                                                       | 5.00E-05 |
| CC1G_09237 | 468685         | 0.52     | 6.04     | -3.54            |                                                             |         |                                                       | 0.0039   |
| CC1G_06001 | 479579         | 287.96   | 364.45   | -0.34            | Inositol-3-phosphate synthase                               | KOG0693 | Myo-inositol-1-phosphate synthase                     | 0.0054   |
| CC1G_15539 | 365798         | 81.62    | 99.83    | -0.29            | Hypothetical protein                                        | KOG1649 | SWI-SNF chromatin remodeling complex, Snf5 subunit    | 0.027    |
| CC1G_07958 | 461642         | 2.30     | 4.48     | -0.96            | Pheromone-regulated membrane protein Prm10                  | KOG1245 | Chromatin remodeling complex WSTF-ISWI, large subunit | 5.00E-05 |
| CC1G_07967 | 436798         | 7.56     | 13.92    | -0.88            | SNF2-family ATP dependent chromatin remodeling factor snf21 | KOG0385 | Chromatin remodeling complex WSTF-ISWI, small subunit | 5.00E-05 |
| CC1G_09469 | 440671         | 5.36     | 8.16     | -0.60            | Hypothetical protein                                        | KOG1973 | Chromatin remodeling protein, contains PHD Zn-finger  | 3.00E-04 |
| CC1G_00100 | 58294          | 46.09    | 61.88    | -0.43            | Brg1-associatedfactor b                                     | KOG0679 | Actin-related protein - Arp4p/Act3p                   | 0.0015   |
