# Supplementary material for: Transcriptome Analysis Reveals Mycelial and Fruiting Responses to Lithium Chloride in Coprinopsis cinerea
Source: MDPI journal article supplement (doi:10.3390/jof10020140), 2024-02-09
Supplement: s1 [file s1]

| Table S2. Unigenes used for validation of gene expression profile in <i>C. cinerea</i> transcriptome data. |                |            |                                                                      |                                                            |  |
|------------------------------------------------------------------------------------------------------------|----------------|------------|----------------------------------------------------------------------|------------------------------------------------------------|--|
| Sample set                                                                                                 | JGI Protein ID | Gene ID    | Differential expression analysis based on RNA-Seq (log2 Fold Change) | Validation of the DEG by qRT-PCR (log2- $\Delta\Delta C$ ) |  |
| LM1/HM                                                                                                     | 473005         | CC1G_07486 | 1.48                                                                 | 1.77 $\pm$ 0.22                                            |  |
|                                                                                                            | 411802         | CC1G_04403 | -1.95                                                                | -2.29 $\pm$ 0.49                                           |  |
|                                                                                                            | 542232         | CC1G_09477 | 1.53                                                                 | 1.92 $\pm$ 0.26                                            |  |
|                                                                                                            | 375908         | CC1G_00058 | -1.95                                                                | -0.98 $\pm$ 0.24                                           |  |
|                                                                                                            | 397251         | CC1G_00620 | -1.41                                                                | -1.92 $\pm$ 0.48                                           |  |
|                                                                                                            | 461885         | CC1G_01088 | -1.15                                                                | -2.19 $\pm$ 1.04                                           |  |
|                                                                                                            |                |            |                                                                      |                                                            |  |
| LM2/HHK                                                                                                    | 467706         | CC1G_00407 | -2.54                                                                | -1.60 $\pm$ 0.45                                           |  |
|                                                                                                            | 429272         | CC1G_15600 | 4.02                                                                 | 3.82 $\pm$ 0.80                                            |  |
|                                                                                                            | 444086         | CC1G_10354 | -1.38                                                                | -1.07 $\pm$ 1.15                                           |  |
|                                                                                                            | 427679         | CC1G_09588 | -1.65                                                                | -2.59 $\pm$ 1.82                                           |  |

2- $\Delta\Delta C$ , relative gene expression level with beta-tubulin serving as the reference gene using qRT-PCR. Data presented as mean  $\pm$  standard deviation (SD) in three replicates. HM, *C. cinerea* mycelium treated with water; LM1, *C. cinerea* treated with 70 mM LiCl; HHK, *C. cinerea* treated with water that formed hyphal knot under favorable environmental conditions for fruiting; LM2, *C. cinerea* treated with 70 mM LiCl that remained in mycelium under favorable environmental conditions for fruiting.
