# Supplementary material for: Transcriptome Analysis Reveals Mycelial and Fruiting Responses to Lithium Chloride in Coprinopsis cinerea
Source: MDPI journal article supplement (doi:10.3390/jof10020140), 2024-02-09
Supplement: s1 [file s1]

**Table S4. GO enrichment between different samples (p-value  $\leq$  0.05).****GO enrichment LM1/HM-UP and LM1/HM-DOWN**

| <b>ID</b>  | <b>Description</b>                                      | <b>ONTOLOGY</b> | <b>GeneRatio</b> | <b>p-value</b> | <b>FDR</b>  |
|------------|---------------------------------------------------------|-----------------|------------------|----------------|-------------|
| GO:0016705 | oxidoreductase activity                                 | MF              | 35/220           | 9.92291E-15    | 1.19564E-12 |
| GO:0020037 | heme binding                                            | MF              | 35/220           | 2.64153E-14    | 1.19564E-12 |
| GO:0046906 | tetrapyrrole binding                                    | MF              | 35/220           | 2.64153E-14    | 1.19564E-12 |
| GO:0004497 | monooxygenase activity                                  | MF              | 30/220           | 1.28384E-13    | 3.97316E-12 |
| GO:0005506 | iron ion binding                                        | MF              | 33/220           | 1.46298E-13    | 3.97316E-12 |
| GO:0048037 | cofactor binding                                        | MF              | 53/220           | 1.14396E-10    | 2.58897E-09 |
| GO:0046914 | transition metal ion binding                            | MF              | 43/220           | 3.02542E-07    | 5.86887E-06 |
| GO:0004601 | peroxidase activity                                     | MF              | 8/220            | 1.25308E-05    | 0.000212694 |
| GO:0016684 | oxidoreductase activity, acting on peroxide as acceptor | MF              | 8/220            | 3.17983E-05    | 0.000479764 |
| GO:0016831 | carboxy-lyase activity                                  | MF              | 10/230           | 1.3104E-07     | 2.31734E-05 |
| GO:0016830 | carbon-carbon lyase activity                            | MF              | 11/230           | 1.34758E-06    | 0.000119154 |
| GO:0005975 | carbohydrate metabolic process                          | BP              | 33/126           | 3.61855E-08    | 1.00558E-05 |
| GO:0016051 | carbohydrate biosynthetic process                       | BP              | 9/126            | 1.93344E-07    | 2.68646E-05 |

**GO enrichment in LM2/HHK-UP and LM2/HHK-DOWN**

|            |                                                      |    |        |             |             |
|------------|------------------------------------------------------|----|--------|-------------|-------------|
| GO:0017062 | respiratory chain complex III assembly               | BP | 6/109  | 6.07505E-07 | 9.27244E-05 |
| GO:0034551 | mitochondrial respiratory chain complex III assembly | BP | 6/109  | 6.07505E-07 | 9.27244E-05 |
| GO:0006259 | DNA metabolic process                                | BP | 25/108 | 2.97058E-08 | 8.41142E-06 |
| GO:0006260 | DNA replication                                      | BP | 12/108 | 4.79964E-07 | 6.79528E-05 |
| GO:0045786 | negative regulation of cell cycle                    | BP | 9/108  | 1.49856E-06 | 0.000141443 |
| GO:0000075 | cell cycle checkpoint                                | BP | 7/108  | 2.56234E-06 | 0.000181387 |
| GO:0000819 | sister chromatid segregation                         | BP | 9/108  | 3.53282E-06 | 0.000200069 |
| GO:0007059 | chromosome segregation                               | BP | 10/108 | 5.5524E-06  | 0.000259299 |
| GO:0005975 | carbohydrate metabolic process                       | BP | 26/108 | 6.41019E-06 | 0.000259299 |
| GO:0007049 | cell cycle                                           | BP | 16/108 | 8.25582E-06 | 0.000292212 |
| GO:0022402 | cell cycle process                                   | BP | 14/108 | 9.36165E-06 | 0.000294536 |
| GO:0098813 | nuclear chromosome segregation                       | BP | 9/108  | 1.87495E-05 | 0.000530907 |
| GO:0051726 | regulation of cell cycle                             | BP | 10/108 | 2.18667E-05 | 0.000562885 |
| GO:0005618 | cell wall                                            | CC | 12/215 | 7.45878E-07 | 2.39466E-05 |

|            |                                                          |    |        |             |             |
|------------|----------------------------------------------------------|----|--------|-------------|-------------|
| GO:0030312 | external encapsulating structure                         | CC | 12/215 | 7.45878E-07 | 2.39466E-05 |
| GO:0009277 | fungal-type cell wall                                    | CC | 11/215 | 1.25152E-06 | 2.67869E-05 |
| GO:0048037 | cofactor binding                                         | MF | 61/257 | 7.48978E-12 | 1.15106E-09 |
| GO:0005506 | iron ion binding                                         | MF | 28/257 | 2.55923E-08 | 1.0046E-06  |
| GO:0020037 | heme binding                                             | MF | 29/257 | 2.61471E-08 | 1.0046E-06  |
| GO:0046906 | tetrapyrrole binding                                     | MF | 29/257 | 2.61471E-08 | 1.0046E-06  |
| GO:0016705 | oxidoreductase activity                                  | MF | 28/257 | 5.1743E-08  | 1.59042E-06 |
| GO:0004497 | monooxygenase activity                                   | MF | 24/257 | 1.21543E-07 | 3.11321E-06 |
| GO:0050660 | flavin adenine dinucleotide binding                      | MF | 22/257 | 1.8604E-07  | 4.08449E-06 |
| GO:0050662 | coenzyme binding                                         | MF | 32/257 | 1.3018E-06  | 2.50083E-05 |
| GO:0016614 | oxidoreductase activity, acting on CH-OH group of donors | MF | 19/257 | 3.65237E-06 | 6.2368E-05  |
| GO:0005199 | structural constituent of cell wall                      | MF | 11/235 | 4.75879E-07 | 7.31351E-05 |

---
