# Supplementary material for: Transcriptome Analysis Reveals Mycelial and Fruiting Responses to Lithium Chloride in Coprinopsis cinerea
Source: J Fungi (Basel). 2024 Feb 9;10(2):140. doi: 10.3390/jof10020140 (PMC10890143; doi:10.3390/jof10020140)
Supplement: Supplementary file 1 [file jof-10-00140-s001.zip › Dataset S1.xlsx]

## Sheet: DEGs_in HMvsLM1
KO7_ID	JGI Protein ID	Length	HM FPPKM	LM1 FPKM	Log2 Fold Change	Gene Description	p_Value
CC1G_07941	358	1137	123.022	535.272	2.12135	hypothetical protein	5e-05
CC1G_07952	353834	1035	125.62	24.3398	-2.36768	hypothetical protein	5e-05
CC1G_07971	354280	1095	29.5921	74.524	1.33249	hypothetical protein	5e-05
CC1G_13911	354219	1146	60.8401	26.872	-1.17892	hypothetical protein	5e-05
CC1G_04288	5182	2172	176.425	426.339	1.27295	dicarboxylic amino acid permease	5e-05
CC1G_11927	492696	879	111.885	41.8701	-1.41802	hypothetical protein	5e-05
CC1G_15780	473590	667	3.35026	55.273	4.04423	hypothetical protein	5e-05
CC1G_04304	492675	2094	35.997	74.2129	1.0438	hypothetical protein	5e-05
CC1G_11924	492692	729	229.171	62.2967	-1.8792	hypothetical protein	5e-05
CC1G_01088	461885	1395	55.6584	25.0118	-1.15399	inositol-pentakisphosphate 2-kinase	5e-05
CC1G_01069	461904	1146	65.8698	161.47	1.29358	hypothetical protein	5e-05
CC1G_13862	9181	737	26.821	86.0766	1.68226	hypothetical protein	5e-05
CC1G_01021	494159	1317	16.8116	33.67	1.00201	arsenite S-adenosylmethyltransferase	5e-05
CC1G_01125	461847	870	76.9948	37.594	-1.03426	hypothetical protein	5e-05
CC1G_13863	437067	962	9.61605	24.6551	1.35837	hypothetical protein	5e-05
CC1G_01059	461914	963	43.6667	20.9451	-1.05992	pantetheine-phosphate adenylyltransferase	5e-05
CC1G_07102	543260	4646	22.035	44.3967	1.01066	hypothetical protein	5e-05
CC1G_07085	426491	1236	430.117	134.365	-1.67857	hypothetical protein	5e-05
CC1G_14438	498913	1782	43.6065	20.3207	-1.10159	hypothetical protein	5e-05
CC1G_06092	437234	1668	7.32509	20.6763	1.49706	hypothetical protein	5e-05
CC1G_14004	498956	1755	2.20045	5.54455	1.33327	hypothetical protein	5e-05
CC1G_06086	370922	408	2.31653	11.4212	2.30168	hypothetical protein	0.0098
CC1G_06095	462051	453	27.6261	56.3569	1.02856	hypothetical protein	0.0003
CC1G_06090	451504	3177	507.898	1182.83	1.21964	elongation factor 3	5e-05
CC1G_06083	479770	1081	41.4881	8.77907	-2.24056	hypothetical protein	5e-05
CC1G_06080	498964	402	25.9932	54.0878	1.05717	hypothetical protein	0.00085
CC1G_14003	370901	483	30.94	14.8923	-1.05491	hypothetical protein	0.0004
CC1G_01580	437282	642	77.9247	372.821	2.25833	hypothetical protein	5e-05
CC1G_01566	370976	2118	4.14389	10.4279	1.33139	fatty acid activator Faa4	5e-05
CC1G_01584	426597	1810	6.31454	111.156	4.13776	hypothetical protein	5e-05
CC1G_09889	371003	1023	30.8523	5.53508	-2.4787	614/534 cytochrome P450	5e-05
CC1G_09890	488894	1084	4.06112	0.329982	-3.62142	hypothetical protein	0.0034
CC1G_09877	371032	363	10.6211	2.86884	-1.88839	hypothetical protein	0.00915
CC1G_03598	437377	454	130.542	44.5421	-1.55127	hypothetical protein	5e-05
CC1G_03618	400577	2129	9.45112	4.56802	-1.04892	lipase I	5e-05
CC1G_15206	479824	469	148.546	59.6119	-1.31724	hypothetical protein	5e-05
CC1G_03604	437368	625	4.64875	1.53483	-1.59877	hypothetical protein	0.00855
CC1G_15386	451588	1851	5.2791	10.6382	1.01089	glucose oxidase	5e-05
CC1G_14667	451611	3063	201.359	29.3705	-2.77733	CAMK/CAMK1 protein kinase	5e-05
CC1G_10592	499145	1161	22.9663	56.4728	1.29804	serine protease	5e-05
CC1G_10601	371400	1527	7.7942	3.64314	-1.09722	hypothetical protein	0.0002
CC1G_10609	437529	1145	4.01509	13.8435	1.78571	hypothetical protein	5e-05
CC1G_15840	400893	597	1.45397	114.014	6.29307	NA	0.0026
CC1G_15645	437532	807	1517.16	307.635	-2.30208	hypothetical protein	5e-05
CC1G_08135	462300	1563	20.0356	8.57452	-1.22444	endoprotease	5e-05
CC1G_14702	475201	1082	22.3246	53.2256	1.25349	oxidoreductase	5e-05
CC1G_08130	358323	618	211.871	84.0282	-1.33424	hypothetical protein	5e-05
CC1G_01430	358370	720	6.31965	2.28691	-1.46645	hypothetical protein	0.00145
CC1G_14685	415201	675	493.678	189.715	-1.37974	hypothetical protein	5e-05
CC1G_04655	462410	1800	66.9103	31.1806	-1.10158	hypothetical protein	5e-05
CC1G_04658	499189	2112	3.24599	8.73885	1.42878	hypothetical protein	5e-05
CC1G_04646	451800	861	2.11667	4.54219	1.1016	glycosyl hydrolase family 10 protein	0.00865
CC1G_11124	371591	582	30.7423	14.9337	-1.04165	hypothetical protein	0.0005
CC1G_12346	371628	663	13.8272	35.0013	1.33991	hypothetical protein	5e-05
CC1G_12343	427225	2049	1.38045	12.4101	3.1683	hypothetical protein	5e-05
CC1G_11876	371623	1305	32.9578	15.172	-1.11921	hypothetical protein	5e-05
CC1G_11189	427199	1400	19.9633	113.486	2.50709	hypothetical protein	5e-05
CC1G_12352	371669	2178	37.7149	10.4619	-1.84998	hypothetical protein	5e-05
CC1G_04866	371700	1248	9.12074	21.4091	1.231	hypothetical protein	5e-05
CC1G_04870	543586	2015	179.128	82.4037	-1.12021	chitinase	5e-05
CC1G_04881	371740	564	140.647	46.132	-1.60824	hypothetical protein	5e-05
CC1G_04883	437818	695	42.0645	7.26696	-2.53318	hypothetical protein	5e-05
CC1G_04883	371744	576	91.9233	30.8568	-1.57484	hypothetical protein	5e-05
CC1G_12432	437818	1740	14.9547	6.99369	-1.09647	hypothetical protein	5e-05
CC1G_07902	371820	918	31.0719	97.2776	1.6465	hypothetical protein	5e-05
CC1G_14579	437832	772	77.255	33.699	-1.19692	hypothetical protein	5e-05
CC1G_00030	25261	1332	1.43166	3.26043	1.18737	hypothetical protein	0.0034
CC1G_12219	462560	941	0.231475	10.1434	5.45354	hypothetical protein	0.0026
CC1G_12229	401354	2546	170.139	53.8952	-1.65849	cytochrome P450 monooxygenase pc-1	5e-05
CC1G_12218	437876	2946	168.115	45.5256	-1.8847	hypothetical protein	5e-05
CC1G_14740	437889	2804	0.618179	1.9194	1.63456	hypothetical protein	0.0001
CC1G_01508	480135	1395	44.3633	9.37115	-2.24307	metacaspase-1	5e-05
CC1G_15243	372014	255	19.1636	66.8561	1.80269	hypothetical protein	0.0068
CC1G_01500	462632	1317	4.31711	9.95666	1.2056	hypothetical protein	5e-05
CC1G_01503	437942	879	1.68225	8.3165	2.30559	metalloprotease	5e-05
CC1G_01518	462618	2751	82.4707	40.5433	-1.02442	hypothetical protein	5e-05
CC1G_11426	372030	1368	14.8335	40.0808	1.43405	hypothetical protein	5e-05
CC1G_08823	437970	1707	13.1256	42.8876	1.70817	hypothetical protein	5e-05
CC1G_08820	452002	845	693.822	305.226	-1.18469	hypothetical protein	5e-05
CC1G_08819	27198	1974	0.964674	1.96142	1.02379	hypothetical protein	0.00575
CC1G_08817	372086	909	5.89907	29.6069	2.32737	hypothetical protein	5e-05
CC1G_08816	372085	963	47.6219	103.895	1.12542	hypothetical protein	5e-05
CC1G_09574	499429	957	16.4491	8.0282	-1.03486	hypothetical protein	0.00045
CC1G_09579	372150	3900	15.8339	4.12504	-1.94054	hypothetical protein	5e-05
CC1G_09563	543742	1575	2.05293	8.25963	2.0084	hypothetical protein	5e-05
CC1G_09569	372153	1032	44.567	6.33144	-2.81537	hypothetical protein	5e-05
CC1G_07070	438000	1097	18.7694	9.33144	-1.00821	hypothetical protein	5e-05
CC1G_07056	507443	3504	106.533	49.1686	-1.1155	hypothetical protein	5e-05
CC1G_14420	475308	3597	228.151	45.7308	-2.31875	hypothetical protein	5e-05
CC1G_14417	30849	777	148.942	29.9772	-2.31282	hypothetical protein	5e-05
CC1G_12417	475379	848	168.533	78.9392	-1.09422	hypothetical protein	5e-05
CC1G_14422	475336	4548	132.049	22.9473	-2.52468	atypical/HisK protein kinase	5e-05
CC1G_06426	358738	475	429.202	158.854	-1.43395	hypothetical protein	5e-05
CC1G_06410	438154	822	2386.68	607.587	-1.97384	hypothetical protein	5e-05
CC1G_10397	452121	1105	199.785	28.103	-2.82965	hypothetical protein	5e-05
CC1G_10409	31906	2045	5.4338	230.405	5.40607	oxidoreductase A;oxidoreductase/cytochrome P450 monooxygenase	5e-05
CC1G_10384	32225	1422	6.37746	49.9077	2.96821	O-methylsterigmatocystin oxidoreductase	5e-05
CC1G_08207	372220	987	75.5876	30.7929	-1.29555	mitochondrial FAD carrier protein	5e-05
CC1G_08199	499499	990	229.704	1098.52	2.25771	hypothetical protein	5e-05
CC1G_08198	462854	1532	8.26672	137.774	4.05885	hypothetical protein	5e-05
CC1G_08197	32766	1475	41.366	125.202	1.59773	hypothetical protein	5e-05
CC1G_11022	401726	488	24.2694	11.3526	-1.09612	hypothetical protein	0.00225
CC1G_09439	507928	1363	28.5131	64.7325	1.18286	hypothetical protein	5e-05
CC1G_15277	33597	1140	9.87714	23.454	1.24767	hypothetical protein	5e-05
CC1G_11034	499548	333	931.033	303.3	-1.61809	hypothetical protein	5e-05
CC1G_11028	499517	1021	58.6327	28.5723	-1.03709	hypothetical protein	5e-05
CC1G_11027	438272	1560	6.49522	15.7966	1.28217	cytochrome P450	5e-05
CC1G_09447	462868	1702	60.9032	28.0706	-1.11746	hypothetical protein	5e-05
CC1G_05457	427867	1932	1.60505	16.9418	3.39989	hypothetical protein	5e-05
CC1G_02303	372406	1731	112.743	53.2922	-1.08104	sphinganine-1-phosphate aldolase	5e-05
CC1G_02307	372474	524	359.409	174.194	-1.04493	glyoxalase I	5e-05
CC1G_04392	508093	711	123.333	58.6595	-1.07212	orange-PA	5e-05
CC1G_04386	462948	700	149.302	12.3997	-3.58986	hypothetical protein	5e-05
CC1G_04379	438392	2336	44.1503	9.55932	-2.20744	hypothetical protein	5e-05
CC1G_04381	543897	2290	71.3289	149.316	1.06581	STE/STE20/FRAY protein kinase	5e-05
CC1G_04378	508178	720	1291.96	77.885	-4.05207	hypothetical protein	5e-05
CC1G_04377	428031	1368	80.4889	22.6618	-1.82853	hypothetical protein	5e-05
CC1G_09795	438404	1074	101.524	212.6	1.06631	hypothetical protein	5e-05
CC1G_09814	372619	1722	12.9938	46.6738	1.84479	elongation factor-2 kinase	0.0008
CC1G_04706	438459	966	60.8731	16.6069	-1.87402	hypothetical protein	5e-05
CC1G_07992	463000	3522	61.4015	20.8286	-1.55971	vacuole protein	5e-05
CC1G_07987	372682	1293	52.5752	21.3017	-1.30341	hypothetical protein	5e-05
CC1G_07988	499664	1833	155.954	41.3241	-1.91606	monosaccharide transporter	5e-05
CC1G_11981	463015	1356	50.7763	5.60531	-3.17929	hypothetical protein	5e-05
CC1G_11982	499677	1032	13.5306	66.2083	2.29079	hypothetical protein	5e-05
CC1G_03854	463032	1823	15.8646	41.0402	1.37123	hypothetical protein	5e-05
CC1G_11711	37640	1335	6.9713	37.9465	2.44447	serine/threonine protein kinase	5e-05
CC1G_03210	402167	1832	45.5678	21.9036	-1.05685	transcription factor	5e-05
CC1G_03235	389393	570	3.96382	14.511	1.87219	hypothetical protein	0.0001
CC1G_03247	494418	474	1133.72	170.864	-2.73015	hypothetical protein	5e-05
CC1G_03281	539116	1662	220.247	38.8682	-2.50246	aspartyl protease	5e-05
CC1G_03227	39978	1467	49.3849	21.191	-1.22062	hypothetical protein	5e-05
CC1G_03250	359121	1605	18.0338	8.64583	-1.06063	hypothetical protein	5e-05
CC1G_03297	358873	1121	719.716	35.786	-4.32996	hypothetical protein	5e-05
CC1G_06898	40441	729	330.355	34.6383	-3.25358	hypothetical protein	5e-05
CC1G_06904	452466	1344	6.75757	27.8141	2.04124	hypothetical protein	5e-05
CC1G_06899	499739	1521	158.363	69.7786	-1.18238	cytochrome b2	5e-05
CC1G_07321	499733	594	458.45	113.972	-2.00808	HHE domain-containing protein	5e-05
CC1G_07320	372931	890	1874.83	692.014	-1.43789	HHE domain-containing protein	5e-05
CC1G_15449	438797	564	18.9142	45.5794	1.26891	hypothetical protein	5e-05
CC1G_07319	42446	879	6.62985	2.76185	-1.26334	hypothetical protein	0.00075
CC1G_11888	463248	1035	17.2665	35.7594	1.05034	hypothetical protein	5e-05
CC1G_03982	372988	866	35.777	72.249	1.01395	hypothetical protein	5e-05
CC1G_03981	402412	1454	163.579	70.7444	-1.2093	hypothetical protein	5e-05
CC1G_03991	428490	1119	14.6866	29.7581	1.01879	hypothetical protein	5e-05
CC1G_03989	463268	999	94.6401	193.787	1.03394	hypothetical protein	5e-05
CC1G_11460	43189	480	789.131	221.021	-1.83608	hypothetical protein	5e-05
CC1G_11455	438877	1569	3.71025	14.5779	1.9742	cytochrome P450	5e-05
CC1G_11445	463307	1521	161.12	23.4192	-2.78237	hypothetical protein	5e-05
CC1G_13794	373120	585	12.6986	5.56041	-1.19141	hypothetical protein	0.0013
CC1G_13023	438924	1741	245.659	18.028	-3.76835	hypothetical protein	5e-05
CC1G_10827	438934	951	127.677	6.10027	-4.38748	lipid phosphate phosphatase 1	5e-05
CC1G_10844	373233	546	99.4779	36.4088	-1.45009	hypothetical protein	5e-05
CC1G_10822	499867	1602	58.6693	133.318	1.18419	anthranilate synthase	5e-05
CC1G_04473	463372	921	116.05	26.1935	-2.14747	3-hydroxybutyryl-CoA dehydrogenase	5e-05
CC1G_04469	499900	1510	17.3925	92.004	2.40323	hypothetical protein	5e-05
CC1G_14125	438997	1275	116.268	13.6947	-3.08577	hypothetical protein	5e-05
CC1G_10556	463387	1888	11.0834	24.9008	1.16779	hypothetical protein	5e-05
CC1G_09148	46726	606	443.808	171.806	-1.36916	hypothetical protein	5e-05
CC1G_09146	499951	2328	16.5449	37.1875	1.16843	beta-glucosidase	5e-05
CC1G_01746	357539	2302	5.97522	1.55708	-1.94015	beta-glucan synthesis-associated protein	5e-05
CC1G_04537	439150	2415	33.8573	94.3172	1.47805	sulfate adenylyltransferase	5e-05
CC1G_04530	439153	1197	3.76884	13.3493	1.82457	epoxide hydrolase domain-containing protein	5e-05
CC1G_04517	463517	1599	5.36887	11.9854	1.15859	hypothetical protein	5e-05
CC1G_04510	494567	1389	107.88	42.644	-1.33901	saccharopine dehydrogenase	5e-05
CC1G_04488	359175	810	26.965	8.30048	-1.69982	hypothetical protein	5e-05
CC1G_09311	439199	1321	1.61045	3.58278	1.15361	hypothetical protein	0.00265
CC1G_04536	389672	1422	59.2218	19.9022	-1.5732	endoplasmic oxidoreductin-1	5e-05
CC1G_14132	359252	1263	6.59504	42.9072	2.70177	endonuclease Uve1	5e-05
CC1G_04513	359391	2208	93.3137	330.024	1.82241	hypothetical protein	5e-05
CC1G_02684	359262	1236	8.55039	23.1799	1.43881	hypothetical protein	5e-05
CC1G_02686	499958	660	41.126	86.4229	1.07136	hypothetical protein	5e-05
CC1G_14324	373499	369	2999.16	111.791	-4.74568	hypothetical protein	5e-05
CC1G_02706	92290	1115	1.56948	26.9404	4.10141	short-chain dehydrogenase	5e-05
CC1G_02688	428944	1235	16.8691	74.2704	2.1384	hypothetical protein	5e-05
CC1G_02692	544231	1204	31.0526	14.3652	-1.11214	hypothetical protein	5e-05
CC1G_09981	376238	576	12.044	4.56134	-1.40078	hypothetical protein	0.00125
CC1G_09983	373545	501	59.177	0.824555	-6.16528	hypothetical protein	0.00345
CC1G_15226	514024	414	14.5438	1.36834	-3.4099	hypothetical protein	0.0039
CC1G_11917	373551	898	2.14093	5.56838	1.37902	hypothetical protein	0.0009
CC1G_11912	480765	585	26.5176	59.7206	1.17128	hypothetical protein	5e-05
CC1G_11911	452794	711	339.986	40.169	-3.08132	hypothetical protein	5e-05
CC1G_09617	434316	1412	64.5496	30.9947	-1.05839	hypothetical protein	5e-05
CC1G_15637	51416	867	78.8972	34.7887	-1.18135	hypothetical protein	5e-05
CC1G_07740	463627	2275	297.945	68.6476	-2.11777	beta-glucan synthesis-associated protein SKN1	5e-05
CC1G_08012	439325	1731	2.00876	5.29161	1.3974	AMP dependent CoA ligase	5e-05
CC1G_08009	383690	1971	3.32148	6.97964	1.07133	hypothetical protein	0.0001
CC1G_07511	439356	846	774.621	201.024	-1.94612	hypothetical protein	5e-05
CC1G_07495	53386	513	10.6487	26.3667	1.30805	hypothetical protein	0.0002
CC1G_07509	500084	477	19.618	165.615	3.07759	hypothetical protein	5e-05
CC1G_07440	480845	892	1.56763	5.92957	1.91935	hypothetical protein	0.0004
CC1G_07533	439399	590	306.106	58.6939	-2.38275	hypothetical protein	5e-05
CC1G_07546	439416	425	70.1505	32.0626	-1.12956	hypothetical protein	5e-05
CC1G_07550	403217	1683	6.51533	184.69	4.82512	hypothetical protein	5e-05
CC1G_07534	452912	3381	15.8399	42.8976	1.43734	topoisomerase 1-associated factor 1	5e-05
CC1G_07544	373872	2108	53.1227	8.06915	-2.71884	DUF89 domain-containing protein	5e-05
CC1G_15601	489780	1611	2.68587	12.6923	2.24049	hypothetical protein	5e-05
CC1G_15602	463751	1734	11.8218	35.3937	1.58205	hypothetical protein	5e-05
CC1G_00842	373884	1971	48.9833	134.42	1.45639	mitochondrial chaperone bcs1	5e-05
CC1G_00837	500128	1771	136.45	64.6276	-1.07814	cystathionine beta-synthase	5e-05
CC1G_03098	429300	1122	15.4628	47.6416	1.62342	hypothetical protein	5e-05
CC1G_00194	439491	1089	3.62599	11.659	1.685	glycoprotein	5e-05
CC1G_00122	359659	1896	436.503	126.922	-1.78205	cytochrome P450	5e-05
CC1G_00083	439616	1028	34.7285	15.6139	-1.15329	sirtuin 5	0.001
CC1G_00068	539374	1353	0.851365	17.7691	4.38345	hypothetical protein	5e-05
CC1G_05638	359748	670	244.816	77.0072	-1.66863	hypothetical protein	5e-05
CC1G_05636	439704	1136	6.44896	1.37235	-2.23242	hypothetical protein	5e-05
CC1G_05631	544432	2097	8.7723	2.27022	-1.95012	hypothetical protein	5e-05
CC1G_13923	439709	1789	5.27521	10.8153	1.03578	hypothetical protein	0.0001
CC1G_13924	354065	2460	480.669	162.676	-1.56304	heat shock cognate 70	5e-05
CC1G_06322	403388	2157	23.7652	49.0822	1.04635	methionyl tRNA synthetase	5e-05
CC1G_08222	504239	561	184.543	433.509	1.23211	ergot alkaloid biosynthetic protein A	5e-05
CC1G_08239	449714	614	5.89902	1.74291	-1.75898	hypothetical protein	0.0063
CC1G_08250	481022	656	1243.73	264.64	-2.23257	hypothetical protein	5e-05
CC1G_12474	439839	956	5.94881	2.35997	-1.33383	xyn11C	0.00095
CC1G_06964	429661	2381	101.634	12.0922	-3.07124	hypothetical protein	5e-05
CC1G_06972	439863	1464	45.8984	6.8353	-2.74737	nad[p]h dehydrogenase b1	5e-05
CC1G_03638	374352	648	447.888	167.194	-1.42162	hypothetical protein	5e-05
CC1G_04620	464092	2084	0.684113	1.80582	1.40034	hypothetical protein	0.00275
CC1G_14106	371496	693	15.5491	7.23772	-1.10322	hypothetical protein	0.00085
CC1G_10726	464116	1173	40.8638	6.22811	-2.71396	hypothetical protein	5e-05
CC1G_00886	64123	1830	57.1073	24.8256	-1.20184	sterol O-acyltransferase	5e-05
CC1G_00897	374579	1383	5.33276	15.0692	1.49864	hypothetical protein	5e-05
CC1G_06750	374546	925	35.1682	74.3584	1.08022	hypothetical protein	5e-05
CC1G_06757	440024	1539	769.845	185.274	-2.05491	hypothetical protein	5e-05
CC1G_06784	359885	717	127.904	63.2751	-1.01535	hypothetical protein	5e-05
CC1G_06807	494813	1737	24.4084	9.02564	-1.43528	hypothetical protein	5e-05
CC1G_11300	464275	2727	373.814	44.6986	-3.06402	heat shock protein	5e-05
CC1G_11309	453252	822	7.49451	3.56976	-1.07001	hypothetical protein	0.00375
CC1G_06715	464169	1702	116.964	45.2534	-1.36997	hypothetical protein	5e-05
CC1G_06761	416437	833	222.164	107.084	-1.05288	glycine dehydrogenase	5e-05
CC1G_06772	440033	458	28.2617	75.9237	1.4257	hypothetical protein	5e-05
CC1G_03342	390448	1068	1.237	2.98059	1.26875	hypothetical protein	0.0062
CC1G_03350	500402	1335	8.04433	28.9988	1.84995	hypothetical protein	5e-05
CC1G_03339	374641	1146	21.721	1280.14	5.88106	hypothetical protein	5e-05
CC1G_03337	500405	1255	33.4629	73.0992	1.12729	cytoplasmic protein	5e-05
CC1G_03336	403889	1136	8.96666	18.6934	1.05989	hypothetical protein	5e-05
CC1G_10987	490004	850	24.469	54.5816	1.15746	hypothetical protein	5e-05
CC1G_11005	440151	1570	8.23238	1.18893	-2.79165	hypothetical protein	5e-05
CC1G_11000	440127	1110	81.4132	31.9456	-1.34965	hypothetical protein	5e-05
CC1G_10993	544656	999	133.511	274.532	1.04001	hypothetical protein	5e-05
CC1G_14058	374666	800	1183.56	411.823	-1.52303	hypothetical protein	5e-05
CC1G_05409	440153	2331	81.5132	216.248	1.40758	614/534 cytochrome P450	5e-05
CC1G_09196	440190	911	61.5081	9.53661	-2.68923	hypothetical protein	5e-05
CC1G_03064	440201	1099	2.38797	5.63937	1.23975	other/FunK1 protein kinase	0.0016
CC1G_15076	544744	843	31.2131	13.612	-1.19727	hypothetical protein	5e-05
CC1G_15077	500528	1560	15.305	6.07795	-1.33235	hypothetical protein	5e-05
CC1G_11591	500529	1179	11.4248	5.48329	-1.05906	hypothetical protein	0.0004
CC1G_15417	490115	2867	1.59171	4.37124	1.45747	glycyl-tRNA synthetase	5e-05
CC1G_11590	481269	1492	15.932	41.7411	1.38954	pyridoxamine phosphate oxidase	5e-05
CC1G_13933	72649	6552	6.44414	32.6513	2.34108	glutamate synthase	5e-05
CC1G_05107	544775	1803	38.9882	11.7195	-1.73413	hypothetical protein	5e-05
CC1G_14099	481295	2322	183.408	386.671	1.07605	hypothetical protein	5e-05
CC1G_04606	464479	1599	13.7003	89.6518	2.71012	hypothetical protein	5e-05
CC1G_10512	440363	351	51.2956	13.2922	-1.94826	hypothetical protein	5e-05
CC1G_10512	360142	450	26.9015	7.73716	-1.79781	hypothetical protein	5e-05
CC1G_10298	360155	4455	180.375	58.7131	-1.61925	transmembrane protein	5e-05
CC1G_10517	453534	1536	107.254	36.2233	-1.56605	hypothetical protein	5e-05
CC1G_13626	360343	4077	27.5153	12.5624	-1.13112	hypothetical protein	5e-05
CC1G_13624	360324	3414	104.179	18.5154	-2.49227	meiotically up-regulated 190 protein	5e-05
CC1G_11223	494899	792	1640.82	742.411	-1.14413	YOP1	5e-05
CC1G_09198	416935	2661	19.7366	8.66083	-1.1883	glycosyltransferase family 28 domain-containing protein	5e-05
CC1G_06074	464580	1253	6.9257	45.7472	2.72365	hypothetical protein	5e-05
CC1G_02522	440521	1281	83.0396	217.624	1.38996	hypothetical protein	5e-05
CC1G_02512	453611	2179	5.85179	29.3004	2.32397	hypothetical protein	5e-05
CC1G_02511	78036	3966	7.05841	16.7447	1.24629	multidrug resistance protein 1	5e-05
CC1G_02506	500620	1419	5.01161	10.5119	1.06867	O-methylsterigmatocystin oxidoreductase	0.00015
CC1G_02761	512348	985	2057.17	773.083	-1.41196	hypothetical protein	5e-05
CC1G_02759	440563	2344	216.875	482.362	1.15325	hypothetical protein	5e-05
CC1G_02752	544849	2754	1053.34	134.739	-2.96673	hypothetical protein	5e-05
CC1G_02748	440580	1156	25.7691	12.4295	-1.05187	hypothetical protein	5e-05
CC1G_02747	440575	529	23.0756	64.6682	1.48669	endoribonuclease L-PSP	5e-05
CC1G_02746	544855	993	94.7214	36.1143	-1.39112	hypothetical protein	5e-05
CC1G_06405	469025	1465	5.27154	1.62626	-1.69667	hypothetical protein	5e-05
CC1G_05824	344708	1182	6.04904	14.1472	1.22574	hypothetical protein	5e-05
CC1G_05825	453654	1473	11.1148	4.69453	-1.24343	membrane protein	5e-05
CC1G_08284	500662	2308	192.153	22.3522	-3.10376	exo-beta-1,3-glucanase	5e-05
CC1G_08292	430560	648	176.74	85.7303	-1.04375	dual specificity protein phosphatase 13	5e-05
CC1G_10166	500672	549	53.135	5.01581	-3.40511	hypothetical protein	5e-05
CC1G_10168	440653	771	361.968	140.438	-1.36593	hypothetical protein	5e-05
CC1G_10153	490265	1918	6.66885	13.8867	1.05819	hypothetical protein	5e-05
CC1G_10162	500697	877	643.438	212.853	-1.59594	ThiJ/PfpI family protein	5e-05
CC1G_10169	544915	513	24.5429	60.3545	1.29815	hypothetical protein	5e-05
CC1G_10170	464714	1485	299.774	631.387	1.07465	carboxylic acid transporter	5e-05
CC1G_09462	375404	1057	35.3047	5.10633	-2.7895	hypothetical protein	5e-05
CC1G_11844	440676	917	0.312354	10.1789	5.02626	hypothetical protein	0.0026
CC1G_15505	430758	1891	17.0634	109.616	2.68348	hypothetical protein	5e-05
CC1G_01132	440687	1075	384.394	178.085	-1.11002	hypothetical protein	5e-05
CC1G_13889	440731	2001	1.95247	3.95729	1.01922	hypothetical protein	0.00095
CC1G_01221	464859	1476	282.923	595.843	1.07452	methionine adenosyltransferase	5e-05
CC1G_01222	485698	1737	18.5577	42.4811	1.1948	amidophosphoribosyltransferase	5e-05
CC1G_01158	539670	1412	263.976	99.7336	-1.40426	hypothetical protein	5e-05
CC1G_13874	390887	1782	81.0269	27.9553	-1.53528	DUF726 domain-containing protein	5e-05
CC1G_00669	360408	2503	46.455	22.3945	-1.05269	hypothetical protein	5e-05
CC1G_08921	85332	1694	10.7652	43.5225	2.01538	hypothetical protein	5e-05
CC1G_08920	544988	1021	7.2469	14.9502	1.04473	hypothetical protein	0.00035
CC1G_08914	544989	1327	3.40236	0.636351	-2.41864	hypothetical protein	0.0046
CC1G_08913	440891	1263	6.19632	2.44305	-1.34273	hypothetical protein	0.0002
CC1G_08912	481509	1152	13.6449	5.26455	-1.37398	hypothetical protein	5e-05
CC1G_14531	464912	1602	4.29041	2.06715	-1.05347	hypothetical protein	0.003
CC1G_00819	375649	1847	166.809	80.9373	-1.04332	hypothetical protein	5e-05
CC1G_09062	440917	2250	107.251	36.8466	-1.54139	chitin deacetylase	5e-05
CC1G_09057	375733	762	184.54	46.3853	-1.99219	hypothetical protein	5e-05
CC1G_09059	464952	633	4.16833	8.65543	1.05414	hypothetical protein	0.0112
CC1G_11369	513187	1036	11.2917	34.7144	1.62027	hypothetical protein	5e-05
CC1G_11374	440959	447	90.0265	222.724	1.30683	hypothetical protein	5e-05
CC1G_11362	86696	1206	7.47542	3.66243	-1.02935	galactose-1-epimerase	0.00055
CC1G_11357	375789	1363	2.71551	1.01849	-1.41479	hypothetical protein	0.00295
CC1G_09660	87095	1149	3.18389	10.6361	1.74011	hypothetical protein	5e-05
CC1G_09661	500875	1869	8.82616	24.9722	1.50046	2OG-Fe[II] oxygenase	5e-05
CC1G_14785	87251	807	2.84147	6.91342	1.28276	hypothetical protein	0.0017
CC1G_14783	375884	2286	43.5124	13.396	-1.69962	hsp78-like protein	5e-05
CC1G_14909	500899	755	4.94764	2.07401	-1.25432	hypothetical protein	0.00715
CC1G_00058	87429	2118	58.7322	117.861	1.00487	5-aminolevulinate synthase	5e-05
CC1G_00063	375908	1844	18.4348	88.5474	2.26402	hypothetical protein	5e-05
CC1G_08030	431090	1847	37.227	110.886	1.57466	FAD binding domain-containing protein	5e-05
CC1G_08033	513409	1630	65.6436	29.1574	-1.17079	flap endonuclease-1	5e-05
CC1G_08032	405038	1349	143.687	18.3579	-2.96845	hypothetical protein	5e-05
CC1G_09607	405043	1354	38.0065	5.03891	-2.91506	hypothetical protein	5e-05
CC1G_05243	481635	4317	58.6392	16.817	-1.80194	hypothetical protein	5e-05
CC1G_05250	513568	1860	29.7547	10.7355	-1.47072	hypothetical protein	5e-05
CC1G_05267	417284	1447	32.8508	10.7948	-1.60559	cytoplasmic protein	5e-05
CC1G_15700	539727	2091	21.9732	170.559	2.95646	hypothetical protein	5e-05
CC1G_05236	476113	1617	23.2528	4.81403	-2.27209	glutamate decarboxylase	5e-05
CC1G_05246	465073	1324	1403.48	389.774	-1.8483	hypothetical protein	5e-05
CC1G_05254	513582	840	73.2561	35.9986	-1.02501	hypothetical protein	0.0037
CC1G_05282	391137	2277	121.389	57.5131	-1.07768	EstA protein	5e-05
CC1G_05293	90959	2157	84.9709	20.0168	-2.08576	ptenb protein	5e-05
CC1G_05295	465133	1770	9.19096	2.29938	-1.99897	alpha-L-arabinofuranosidase A	5e-05
CC1G_05298	417392	718	31.9047	306.77	3.26532	hypothetical protein	5e-05
CC1G_05299	485770	729	3611.34	1439.72	-1.32675	hypothetical protein	5e-05
CC1G_08750	441209	1398	1.81403	3.96165	1.1269	cytochrome P450	0.00135
CC1G_14324	50839	463	1887.03	274.543	-2.78102	hypothetical protein	5e-05
CC1G_08768	92290	855	2.47382	6.8949	1.47879	hypothetical protein	0.00075
CC1G_07822	545148	1044	8.78518	4.32304	-1.02303	hypothetical protein	0.0033
CC1G_09992	376123	948	564.614	124.39	-2.18239	hypothetical protein	5e-05
CC1G_09999	405272	1364	9.42219	3.33452	-1.49858	hypothetical protein	5e-05
CC1G_10004	431338	525	62.5489	23.2823	-1.42575	hypothetical protein	5e-05
CC1G_09993	376182	656	95.0613	33.1248	-1.52095	hypothetical protein	5e-05
CC1G_02492	405275	486	10.1148	520.693	5.68589	hypothetical protein	5e-05
CC1G_02494	376268	1254	18.3301	547.063	4.89942	hypothetical protein	5e-05
CC1G_02491	501042	2337	12.169	381.748	4.97134	L-amino acid oxidase	5e-05
CC1G_02493	376281	2294	23.9633	150.343	2.64936	DyP	5e-05
CC1G_02495	441320	2165	5.66857	25.3807	2.16267	hypothetical protein	5e-05
CC1G_11695	441323	2160	1.48399	5.03082	1.76132	glucoamylase	5e-05
CC1G_11698	441344	1086	37.4531	14.6549	-1.3537	hypothetical protein	0.00095
CC1G_14973	93925	1044	81.7061	31.9647	-1.35396	hypothetical protein	5e-05
CC1G_03411	501073	2353	41.8674	15.4827	-1.43517	asparagine-linked glycosylation protein 11	5e-05
CC1G_03423	514244	1325	1.78424	4.14034	1.21444	hypothetical protein	0.00175
CC1G_03414	545253	1188	30.5735	115.765	1.92085	geranylgeranyltransferase type I	5e-05
CC1G_12897	376392	1386	4.31542	1.62422	-1.40975	carbohydrate deacetylase	0.0003
CC1G_05433	95500	918	0.581968	4.93975	3.08543	ergot alkaloid biosynthetic protein A	0.01025
CC1G_05443	431548	2052	0.656598	1.64983	1.32924	hypothetical protein	0.0029
CC1G_05440	481802	968	212.387	72.651	-1.54764	hypothetical protein	5e-05
CC1G_09302	95697	1016	4.85504	14.8029	1.60832	hypothetical protein	5e-05
CC1G_09292	95811	1497	5.58775	1.6113	-1.79405	glucooligosaccharide oxidase	5e-05
CC1G_09291	501135	1646	83.4808	34.1204	-1.29081	hypothetical protein	5e-05
CC1G_09287	441476	2540	3.5352	17.3398	2.29422	hypothetical protein	5e-05
CC1G_10336	95982	977	307.119	130.369	-1.2362	hypothetical protein	5e-05
CC1G_10335	441494	1345	35.676	11.551	-1.62693	hypothetical protein	5e-05
CC1G_06452	385219	2139	427.747	77.8858	-2.45733	glucan 1,3-beta-glucosidase	5e-05
CC1G_06502	411452	909	6.40523	16.8265	1.39341	hypothetical protein	5e-05
CC1G_06503	354640	849	296.457	143.203	-1.04977	hypothetical protein	5e-05
CC1G_06519	98230	1115	91.8984	10.8178	-3.08663	hypothetical protein	5e-05
CC1G_07302	441612	1047	77.9105	21.9474	-1.82777	hypothetical protein	5e-05
CC1G_07315	492822	1983	7.60607	3.72043	-1.03168	salicylate hydroxylase	0.00015
CC1G_05718	385497	1069	2.05114	38.4664	4.2291	hypothetical protein	5e-05
CC1G_14882	385523	883	9.17746	18.5079	1.01197	hypothetical protein	0.00055
CC1G_14888	385555	984	562.267	40.1799	-3.80671	hypothetical protein	5e-05
CC1G_04423	454372	1026	48.1538	14.5135	-1.73025	thioesterase II	5e-05
CC1G_08625	441719	1308	46.8625	10.9373	-2.09918	hypothetical protein	5e-05
CC1G_06451	354748	3195	213.854	42.0364	-2.34692	hypothetical protein	5e-05
CC1G_04713	519767	914	41.7877	9.2251	-2.17944	NCP1	5e-05
CC1G_06484	96766	339	74.9885	8.63071	-3.11912	hypothetical protein	0.00065
CC1G_06492	354674	1134	0.769257	2.62994	1.77349	hypothetical protein	0.0063
CC1G_06509	484030	1338	123.901	20.6882	-2.58231	lanthionine synthetase C-like protein	5e-05
CC1G_07301	354841	2214	38.4879	15.8965	-1.2757	hypothetical protein	5e-05
CC1G_07304	465458	1394	190.527	52.4382	-1.86131	hypothetical protein	5e-05
CC1G_07314	385464	1272	23.1472	63.9662	1.46647	short-chain dehydrogenase/reductase SDR	5e-05
CC1G_05728	441645	1434	10.5202	30.2939	1.52587	drug transporter	5e-05
CC1G_04403	465490	1616	54.8913	14.2304	-1.9476	protein kinase subdomain-containing protein PKL/CAK/ChoK	5e-05
CC1G_04093	375467	1668	1.7403	0.545848	-1.67276	hypothetical protein	0.0017
CC1G_00707	326169	1860	62.0681	28.7128	-1.11216	hypothetical protein	5e-05
CC1G_00714	361036	1736	0.529045	2.09276	1.98394	hypothetical protein	0.00385
CC1G_00726	391313	822	58.8837	29.1688	-1.01344	NGG1 interacting factor 3	5e-05
CC1G_10103	465599	1815	19.2605	42.778	1.15122	uroporphyrin-III C-methyltransferase	5e-05
CC1G_10113	360877	573	245.302	68.7745	-1.83461	hypothetical protein	5e-05
CC1G_13785	465631	288	227.287	65.827	-1.78776	hypothetical protein	5e-05
CC1G_04108	360959	1185	54.9361	26.6089	-1.04585	hypothetical protein	5e-05
CC1G_00721	504100	657	52.6864	22.5709	-1.22297	hypothetical protein	5e-05
CC1G_00723	441790	669	81.9631	225.755	1.46171	CGL3 lectin	5e-05
CC1G_00739	539794	1566	4.83424	10.9836	1.184	hypothetical protein	5e-05
CC1G_04968	495181	1425	37.6425	17.7687	-1.08303	hypothetical protein	5e-05
CC1G_04359	376576	939	39.5979	88.0908	1.15357	hypothetical protein	5e-05
CC1G_04357	454503	1587	2.67766	5.81988	1.12001	other/HAL protein kinase	0.0001
CC1G_02162	376625	1901	56.1001	21.6338	-1.37472	hypothetical protein	5e-05
CC1G_04591	441948	3699	60.6181	21.219	-1.51439	hypothetical protein	5e-05
CC1G_14040	441975	258	35.754	147.09	2.04052	hypothetical protein	0.0007
CC1G_04898	450564	3171	2.25541	4.85515	1.10613	hypothetical protein	5e-05
CC1G_04906	501261	457	12.219	46.692	1.93405	hypothetical protein	5e-05
CC1G_08038	442002	1793	3.77449	8.31753	1.13987	614/534 cytochrome P450	5e-05
CC1G_08041	442010	1377	11.0284	31.2329	1.50184	hypothetical protein	5e-05
CC1G_08043	442015	1714	11.7557	4.81773	-1.28694	hypothetical protein	5e-05
CC1G_02227	405851	1758	1359.02	183.848	-2.88598	hypothetical protein	5e-05
CC1G_02221	454610	4512	39.5219	10.8037	-1.87113	hypothetical protein	5e-05
CC1G_02219	481955	1456	0.742211	1.81821	1.29262	hypothetical protein	0.0077
CC1G_15349	405895	577	9.62902	28.6389	1.57251	hypothetical protein	5e-05
CC1G_02208	431957	1437	99.2478	45.9073	-1.11231	hypothetical protein	5e-05
CC1G_07016	376920	1437	0.799739	1.96505	1.29697	other/FunK1 protein kinase	0.00505
CC1G_05192	460351	1650	339.016	51.0541	-2.73125	fasciclin domain family protein	5e-05
CC1G_05162	361136	1335	53.8809	16.5155	-1.70595	hypothetical protein	5e-05
CC1G_05112	495234	3064	9.34488	43.8986	2.23193	hypothetical protein	5e-05
CC1G_10480	442154	1232	2.8517	37.6709	3.72356	hypothetical protein	5e-05
CC1G_15369	502201	960	3.97987	1.5312	-1.37806	hypothetical protein	0.00415
CC1G_08416	376988	1710	13.5294	62.3528	2.20435	hypothetical protein	5e-05
CC1G_14919	111086	773	16.8538	78.578	2.22105	hypothetical protein	5e-05
CC1G_08427	432038	1379	133.828	328.897	1.29726	hypothetical protein	5e-05
CC1G_08426	111399	729	5.12014	24.9634	2.28556	hypothetical protein	5e-05
CC1G_08428	380987	512	93.631	205.596	1.13476	hypothetical protein	5e-05
CC1G_10672	545488	1135	11.3216	4.00768	-1.49824	hypothetical protein	5e-05
CC1G_07227	442195	1110	74.21	34.035	-1.12459	hypothetical protein	5e-05
CC1G_10582	377087	1440	2.25472	5.53118	1.29464	endoglucanase family 5 glycoside hydrolase	5e-05
CC1G_10585	377156	1485	82.1762	31.4889	-1.38388	hypothetical protein	5e-05
CC1G_12843	454783	489	6.41424	21.4196	1.73958	hypothetical protein	0.00185
CC1G_03045	432177	1443	10.8656	37.6219	1.7918	membrane protein	5e-05
CC1G_03047	466015	819	3.37152	18.0002	2.41654	lysozyme	5e-05
CC1G_00682	377200	4743	38.7146	100.123	1.37082	nod factor export ATP-binding protein I	5e-05
CC1G_00680	501445	2613	7.61676	20.4389	1.42407	ATP dependent DNA ligase	5e-05
CC1G_06708	454808	1017	18.6945	2.06881	-3.17574	hypothetical protein	5e-05
CC1G_06710	432263	1230	108.206	232.803	1.10533	hypothetical protein	5e-05
CC1G_06207	384086	1701	8.95187	4.40845	-1.02192	hypothetical protein	0.00035
CC1G_06219	447521	1176	83.0432	14.8285	-2.48549	hypothetical protein	5e-05
CC1G_06224	466081	2227	2.44039	9.50714	1.9619	hypothetical protein	5e-05
CC1G_06241	115138	411	23.9184	10.4492	-1.19473	hypothetical protein	0.00445
CC1G_06225	454867	1458	555.613	209.537	-1.40687	oxalate decarboxylase	5e-05
CC1G_06245	361522	2301	78.9391	196.01	1.31211	hypothetical protein	5e-05
CC1G_06249	442435	1413	8.47193	2.015	-2.07191	phosphatidylserine decarboxylase	5e-05
CC1G_13434	361342	1169	16.9468	2.97123	-2.51187	secreted protein	5e-05
CC1G_13195	545612	866	33.3792	3.28808	-3.34363	hypothetical protein	5e-05
CC1G_13194	482122	1779	74.8322	26.564	-1.49419	proline dehydrogenase	5e-05
CC1G_05527	432344	1628	39.6307	12.6161	-1.65135	hypothetical protein	5e-05
CC1G_02383	369470	628	20.6101	9.43402	-1.12741	hypothetical protein	0.0004
CC1G_14287	432406	777	42.7729	101.726	1.24992	hypothetical protein	5e-05
CC1G_02380	482144	1098	205.135	90.4263	-1.18176	iron/ascorbate oxidoreductase	5e-05
CC1G_02372	466186	1398	60.9087	25.3798	-1.26297	protein kinase subdomain-containing protein PKL/CAK/Fmp29	5e-05
CC1G_02376	501525	4230	2.64144	6.75112	1.3538	hypothetical protein	5e-05
CC1G_10183	406379	2723	3.32316	10.967	1.72254	ubiquitin carboxyl-terminal hydrolase 5	5e-05
CC1G_10182	432451	2400	26.9365	12.1867	-1.14426	hypothetical protein	5e-05
CC1G_08593	442545	1078	146.842	326.947	1.15479	hypothetical protein	5e-05
CC1G_08592	545670	834	450.891	73.0164	-2.62649	sorbose reductase SOU1	5e-05
CC1G_09641	377557	1877	22.9643	51.5564	1.16676	hypothetical protein	5e-05
CC1G_09642	118644	1455	22.6651	88.0506	1.95786	hypothetical protein	5e-05
CC1G_12127	447747	1609	3.64692	10.159	1.47801	hypothetical protein	5e-05
CC1G_12134	482207	3285	4.30743	1.45696	-1.56387	hypothetical protein	5e-05
CC1G_12131	516935	2174	24.1841	11.5586	-1.06509	hypothetical protein	5e-05
CC1G_09281	482211	1008	7.70135	3.62468	-1.08726	hypothetical protein	0.00105
CC1G_09280	377631	792	5.32204	16.5619	1.63781	hypothetical protein	5e-05
CC1G_06145	377624	1395	40.1862	9.64647	-2.05863	hypothetical protein	5e-05
CC1G_06143	501604	684	52.0243	14.3445	-1.85869	hypothetical protein	5e-05
CC1G_06139	377661	538	89.8672	181.069	1.01067	hypothetical protein	5e-05
CC1G_06133	545723	1861	3.95103	13.902	1.815	hypothetical protein	5e-05
CC1G_14013	119597	351	17.855	46.0604	1.3672	hypothetical protein	0.0007
CC1G_06835	501614	735	33.819	12.8727	-1.39352	hypothetical protein	5e-05
CC1G_14225	361750	759	1899.69	154.031	-3.62447	hypothetical protein	5e-05
CC1G_06875	495436	2199	73.4898	30.8422	-1.25264	ATP-binding cassette transporter	5e-05
CC1G_06870	361626	2256	47.3634	157.796	1.73622	methyltransferase type 11	5e-05
CC1G_06868	119838	1264	4.98483	25.1399	2.33436	glycosyl hydrolase family 16	5e-05
CC1G_06867	517049	918	89.3285	200.587	1.16703	hypothetical protein	5e-05
CC1G_06862	442673	1638	13.3482	33.0364	1.30741	hypothetical protein	5e-05
CC1G_06841	495373	1259	43.5565	16.5642	-1.39482	flavoprotein oxygenase	5e-05
CC1G_06838	120499	2202	377.219	147.28	-1.35684	phenylalanine ammonium lyase	5e-05
CC1G_04039	361541	618	231.529	104.306	-1.15037	NADH:quinone oxidoreductase	5e-05
CC1G_08903	377714	891	4.1339	1.65636	-1.31949	hypothetical protein	0.00845
CC1G_08894	501633	1208	8.15131	3.20852	-1.34513	hypothetical protein	5e-05
CC1G_08904	406636	696	36.7425	4.35537	-3.07658	hypothetical protein	5e-05
CC1G_08897	466395	579	112.751	42.0352	-1.42347	hypothetical protein	5e-05
CC1G_02861	501639	2103	14.3239	38.4997	1.42643	hypothetical protein	5e-05
CC1G_02860	501653	1738	4.54101	66.8504	3.87985	mannanase	5e-05
CC1G_08259	442792	2358	13.3219	6.47094	-1.04175	hypothetical protein	5e-05
CC1G_06131	490989	3276	107.585	25.9914	-2.04936	protein phosphatase regulator	5e-05
CC1G_06126	122920	1996	3.52693	10.3863	1.55819	hypothetical protein	5e-05
CC1G_06126	122918	1914	6.67122	20.2476	1.60173	hypothetical protein	5e-05
CC1G_08491	122918	1048	125.65	273.565	1.12247	hypothetical protein	5e-05
CC1G_03087	432792	2193	7.49922	159.878	4.41409	metalloreductase	5e-05
CC1G_03077	501710	2277	210.707	67.7952	-1.63598	mucoidy inhibitor A	5e-05
CC1G_04336	442872	874	4.35159	11.1912	1.36275	hypothetical protein	0.00015
CC1G_04344	432876	2223	130.921	53.7071	-1.28551	endoplasmic reticulum protein	5e-05
CC1G_05573	432854	865	63.5154	221.982	1.80526	hypothetical protein	5e-05
CC1G_12290	442931	3971	7.77234	16.8479	1.11615	RNA-dependent RNA polymerase	5e-05
CC1G_12295	124704	1228	413.786	116.875	-1.82392	hypothetical protein	5e-05
CC1G_12299	442940	998	9.28138	3.79554	-1.29003	hypothetical protein	0.00035
CC1G_03528	442944	1637	179.758	72.4571	-1.31085	hypothetical protein	5e-05
CC1G_03518	442955	3060	49.0381	21.9539	-1.15942	nuclear protein	5e-05
CC1G_03508	466523	1242	63.7995	27.3797	-1.22044	hypothetical protein	5e-05
CC1G_03493	361824	606	197.796	72.8527	-1.44096	hypothetical protein	5e-05
CC1G_11060	455254	1515	1.76141	3.85745	1.13091	hypothetical protein	0.0013
CC1G_11053	361786	1845	199.522	97.2578	-1.03666	hypothetical protein	5e-05
CC1G_12440	418420	1635	0.816865	1.79681	1.13727	hypothetical protein	0.00935
CC1G_12437	482356	1370	13.0351	6.14453	-1.08502	hypothetical protein	0.00015
CC1G_14495	126949	891	176.358	43.1643	-2.0306	hypothetical protein	5e-05
CC1G_14494	466616	2796	160.942	29.5086	-2.44734	hypothetical protein	5e-05
CC1G_00014	127523	1256	69.4515	28.2419	-1.29817	acyl-CoA oxidase	5e-05
CC1G_10148	443090	3781	12.3436	37.0461	1.58555	hypothetical protein	5e-05
CC1G_09084	482401	1277	3.03117	10.8108	1.83453	hypothetical protein	5e-05
CC1G_01611	128637	1200	112.776	301.461	1.41851	hypothetical protein	5e-05
CC1G_13819	129266	951	19.4644	43.8287	1.17104	hypothetical protein	5e-05
CC1G_06990	466672	1495	96.9376	44.1138	-1.13583	hypothetical protein	5e-05
CC1G_12113	130255	1575	152.308	64.0933	-1.24875	hypothetical protein	5e-05
CC1G_04957	378364	1593	53.9035	16.6998	-1.69055	hypothetical protein	5e-05
CC1G_03025	455424	4062	118.013	242.372	1.03828	multidrug resistance protein 1	5e-05
CC1G_00757	540181	870	22.1574	10.9653	-1.01484	hypothetical protein	0.0003
CC1G_02983	466739	1095	67.5125	136.395	1.01456	hypothetical protein	5e-05
CC1G_07789	378371	1090	9.33284	22.5292	1.27141	hypothetical protein	5e-05
CC1G_07790	482487	356	5.15188	19.8835	1.9484	hypothetical protein	0.0009
CC1G_07797	545978	1599	101.022	332.891	1.72039	glucose transporter	5e-05
CC1G_07804	501903	612	206.036	102.327	-1.00971	hypothetical protein	5e-05
CC1G_00690	378427	2157	2.65733	34.6007	3.70275	laccase 5	5e-05
CC1G_06648	443425	711	9.80985	3.13674	-1.64497	hypothetical protein	0.0004
CC1G_06645	501963	1353	9.17984	53.073	2.53144	hypothetical protein	5e-05
CC1G_14402	501966	1512	120.138	47.609	-1.33539	hypothetical protein	5e-05
CC1G_02721	443493	2938	1656.15	217.935	-2.92586	hypothetical protein	5e-05
CC1G_02720	433477	1406	17.6293	4.0367	-2.12673	retinol dehydrogenase 12	5e-05
CC1G_09017	482574	2445	76.3559	34.5788	-1.14285	CAP1	5e-05
CC1G_09020	495658	1716	32.2119	10.8216	-1.57368	hypothetical protein	5e-05
CC1G_00982	455640	1311	1.427	3.62633	1.34552	PQ loop repeat protein	0.00105
CC1G_08990	495606	1127	28.0179	9.3858	-1.5778	hypothetical protein	5e-05
CC1G_07839	392538	885	152.229	74.0486	-1.0397	hypothetical protein	5e-05
CC1G_05478	443610	2182	5.81674	15.8421	1.44548	hypothetical protein	0.00055
CC1G_08941	139008	768	70.4972	35.0254	-1.00916	hypothetical protein	5e-05
CC1G_08945	491291	1563	0.675863	3.9453	2.54533	cytochrome P450	0.0002
CC1G_08950	502065	1314	525.946	95.2342	-2.46536	metalloprotease	5e-05
CC1G_08962	491298	1273	7.89671	45.0536	2.51232	hypothetical protein	5e-05
CC1G_08961	407588	1350	2.58915	51.6014	4.31686	hypothetical protein	5e-05
CC1G_15752	139333	1506	7.65149	18.6716	1.28703	hypothetical protein	5e-05
CC1G_08958	482636	847	15.1619	7.09063	-1.09646	hypothetical protein	0.0003
CC1G_02714	443679	1639	0.416689	81.2944	7.60804	peroxidase TAP	0.0001
CC1G_04828	407604	1016	15.2569	84.5932	2.47108	hypothetical protein	5e-05
CC1G_04641	491323	1470	79.0062	31.4837	-1.32736	hypothetical protein	5e-05
CC1G_04640	379022	1518	69.3518	14.8579	-2.22271	hypothetical protein	5e-05
CC1G_06179	379012	4008	10.0618	4.56063	-1.14158	hypothetical protein	5e-05
CC1G_06177	495676	510	850.746	180.171	-2.23936	hypothetical protein	5e-05
CC1G_06175	362389	2223	234.106	98.4593	-1.24957	transketolase	5e-05
CC1G_10028	443762	1713	114.683	56.8589	-1.0122	hypothetical protein	5e-05
CC1G_06168	362475	1914	64.4748	153.627	1.25263	flavin-containing monooxygenase	5e-05
CC1G_10061	362377	1575	0.918764	15.3026	4.05794	hypothetical protein	5e-05
CC1G_05839	362384	1420	234.875	55.7932	-2.07373	hypothetical protein	5e-05
CC1G_05842	546172	677	49.0085	21.5292	-1.18674	hypothetical protein	5e-05
CC1G_05834	433721	1915	1.57181	6.17306	1.97356	hypothetical protein	5e-05
CC1G_13268	142396	2169	12.289	3.47423	-1.8226	other/FunK1 protein kinase	5e-05
CC1G_11776	546212	846	158.356	76.5174	-1.04931	hypothetical protein	5e-05
CC1G_11776	546211	431	53.7529	21.2708	-1.33747	hypothetical protein	0.00015
CC1G_11774	546211	708	1.56959	28.8351	4.19937	hypothetical protein	5e-05
CC1G_03119	502195	1458	1.15726	3.16604	1.45197	squalene monooxygenase	0.00075
CC1G_08572	433858	398	5206.36	1701.95	-1.61309	mismatched base pair and cruciform DNA recognition protein	5e-05
CC1G_05516	443932	2683	5.44824	2.41713	-1.1725	alpha amylase	0.00035
CC1G_13827	277380	1430	13.7616	34.708	1.33462	hypothetical protein	5e-05
CC1G_10205	443946	880	1.57024	84.1556	5.744	hypothetical protein	5e-05
CC1G_15252	443953	1569	20.8583	9.59973	-1.11956	hypothetical protein	5e-05
CC1G_07280	379280	1374	108.158	53.4505	-1.01687	vesicle-associated membrane protein 712	5e-05
CC1G_07139	407937	645	10.3312	33.015	1.67612	hypothetical protein	5e-05
CC1G_07125	362579	1131	149.158	349.243	1.22739	phospho-2-dehydro-3-deoxyheptonate aldolase	5e-05
CC1G_07128	362606	549	106.34	29.1403	-1.8676	hypothetical protein	5e-05
CC1G_07138	495744	999	4.73643	13.0129	1.45807	hypothetical protein	5e-05
CC1G_05645	392815	1769	6.85846	24.0094	1.80764	hypothetical protein	5e-05
CC1G_05652	519684	1265	20.81	65.1257	1.64595	TKL/TKL-ccin protein kinase	5e-05
CC1G_10354	482772	898	36.7986	542.575	3.8821	hypothetical protein	5e-05
CC1G_10352	444086	2012	21.9474	9.46813	-1.2129	hypothetical protein	5e-05
CC1G_15472	546285	390	64.5884	12.027	-2.425	hypothetical protein	5e-05
CC1G_05583	434032	603	2.58085	5.92901	1.19994	hypothetical protein	0.0088
CC1G_05581	502325	816	8.19412	33.4956	2.03131	hypothetical protein	5e-05
CC1G_05577	491480	695	1304.14	545.159	-1.25835	hypothetical protein	5e-05
CC1G_03363	546324	2751	21.8435	57.0409	1.3848	phospholipase	5e-05
CC1G_03366	148285	2574	7.34351	16.1537	1.13732	hypothetical protein	5e-05
CC1G_14963	474594	891	4.31616	9.88709	1.1958	hypothetical protein	0.0009
CC1G_03790	482834	1698	160.204	35.8588	-2.15952	glutamate decarboxylase	5e-05
CC1G_03833	495829	1524	0.501863	11.9127	4.56907	hypothetical protein	0.0001
CC1G_08806	476850	1938	87.2915	28.5096	-1.61439	hypothetical protein	5e-05
CC1G_08808	456165	2268	133.638	29.8549	-2.16229	hypothetical protein	5e-05
CC1G_08805	379576	2050	46.7413	20.4798	-1.1905	hypothetical protein	5e-05
CC1G_07746	151067	1097	4.12534	11.273	1.45029	hypothetical protein	5e-05
CC1G_07748	482858	2814	88.7388	34.7217	-1.35373	DUF300 domain-containing protein	5e-05
CC1G_13559	546368	772	7.24816	1.95441	-1.89088	hypothetical protein	0.00015
CC1G_05610	444311	1090	0.978608	4.5097	2.20423	hypothetical protein	0.002
CC1G_05615	520214	1040	324.585	57.8616	-2.48792	hypothetical protein	5e-05
CC1G_15634	444356	1697	18.8884	50.5418	1.41997	hypothetical protein	5e-05
CC1G_09783	446133	1510	23.7517	93.1326	1.97126	hypothetical protein	5e-05
CC1G_11566	444368	1234	20.8938	49.0107	1.23002	hypothetical protein	5e-05
CC1G_11562	444370	2013	22.6556	75.1308	1.72954	hypothetical protein	5e-05
CC1G_00366	502449	613	1452.27	577.014	-1.33164	hypothetical protein	5e-05
CC1G_14642	385907	1047	169.816	77.3185	-1.13509	hypothetical protein	5e-05
CC1G_00338	493018	1977	8.99323	1.98119	-2.18247	hypothetical protein	5e-05
CC1G_00321	156206	708	386.089	182.171	-1.08364	hypothetical protein	5e-05
CC1G_14633	355271	1581	64.429	282.035	2.13009	hypothetical protein	5e-05
CC1G_00287	467805	2928	44.492	22.055	-1.01244	cortical actin cytoskeleton protein asp1	5e-05
CC1G_00243	456365	480	242.907	67.9436	-1.83799	hypothetical protein	5e-05
CC1G_00228	537897	3660	275.175	95.4707	-1.52722	sodium transport ATPase	5e-05
CC1G_00200	474173	1271	34.7667	15.2366	-1.19017	ribonucleotide reductase small subunit	5e-05
CC1G_14641	444672	846	50.6195	25.1251	-1.01056	hypothetical protein	5e-05
CC1G_14640	467776	2490	49.0633	18.7518	-1.38762	patatin-like phospholipase domain-containing protein	5e-05
CC1G_14630	467777	495	10.4583	2.17131	-2.268	hypothetical protein	0.00645
CC1G_00288	467810	1964	17.6699	6.94131	-1.34801	long-chain-fatty-acid-CoA ligase	5e-05
CC1G_00248	444586	1461	14.7698	6.97711	-1.08195	mitochondrial protein	5e-05
CC1G_00225	412402	879	14.5098	35.3411	1.28432	hypothetical protein	5e-05
CC1G_09401	355212	2076	76.934	31.8803	-1.27096	hypothetical protein	5e-05
CC1G_15273	161785	1804	275.195	134.932	-1.02822	ubiquitin carboxyl-terminal hydrolase 6	5e-05
CC1G_01656	444724	2265	28.2243	63.433	1.16829	hypothetical protein	5e-05
CC1G_09431	363001	1665	52.9066	364.725	2.78529	cytochrome P450 78A3p	5e-05
CC1G_09430	363038	1064	6.06186	16.0278	1.40274	sirtuin	5e-05
CC1G_01663	476867	1024	383.93	75.2343	-2.35138	endoplasmic reticulum protein	5e-05
CC1G_01661	444722	3547	15.327	33.8168	1.14166	hypothetical protein	5e-05
CC1G_00950	161999	807	2.64193	6.12186	1.21238	hypothetical protein	0.0052
CC1G_08979	468021	1461	190.449	74.9798	-1.34483	HPP family protein	5e-05
CC1G_08981	444789	1582	2.94447	13.6765	2.21562	hypothetical protein	5e-05
CC1G_08439	503850	1672	1.70196	10.8948	2.67837	PKL/CAK/Fmp29-like protein kinase subdomain-containing protein	5e-05
CC1G_05923	408364	1551	60.7115	131.53	1.11535	LAP1	5e-05
CC1G_05921	379980	1524	46.5608	96.394	1.04983	hypothetical protein	5e-05
CC1G_05918	379989	1304	5.40027	10.8652	1.00861	aminopeptidase	0.00025
CC1G_05917	163961	1720	41.0127	95.0621	1.2128	aminopeptidase	5e-05
CC1G_06016	444840	1074	2.19011	5.16359	1.23737	tyrosinase central domain-containing protein	0.0006
CC1G_01618	408462	1350	18.8301	3.08664	-2.60893	alcohol dehydrogenase superfamily protein	5e-05
CC1G_01619	444850	1521	3.16459	21.6307	2.77299	cytochrome P450	5e-05
CC1G_01620	502573	2193	23.5633	55.0159	1.22331	cytochrome P450	5e-05
CC1G_01623	444852	1275	135.899	57.453	-1.24208	hypothetical protein	5e-05
CC1G_02166	502577	1140	3.71587	0.962498	-1.94884	hypothetical protein	0.00035
CC1G_02181	419431	330	106.339	482.493	2.18183	CoH1	5e-05
CC1G_02183	468107	452	1918.04	5442.47	1.50463	CoH1	5e-05
CC1G_02190	419467	2123	271.547	126.585	-1.1011	vacuole protein	5e-05
CC1G_02204	486419	2640	332.421	137.065	-1.27815	glycogen phosphorylase	5e-05
CC1G_02167	495987	934	92.3385	41.1583	-1.16575	hypothetical protein	5e-05
CC1G_03002	164498	375	649.339	206.086	-1.65572	hypothetical protein	5e-05
CC1G_03009	495992	3273	28.0165	104.08	1.89335	nonribosomal peptide synthetase 12	5e-05
CC1G_06531	468140	759	109.368	35.9475	-1.60523	hypothetical protein	5e-05
CC1G_06532	380077	4191	15.9281	32.2518	1.01781	ATP-dependent bile acid permease	5e-05
CC1G_07783	502586	1878	39.6551	16.0162	-1.30797	multidrug transporter	5e-05
CC1G_07781	502591	1062	8.353	31.0387	1.8937	hypothetical protein	5e-05
CC1G_07780	468158	2472	3.18961	16.8378	2.40025	hypothetical protein	5e-05
CC1G_12717	434532	806	1.11473	4.87293	2.12809	hypothetical protein	0.004
CC1G_12719	166751	1520	236.162	113.407	-1.05828	hypothetical protein	0.00265
CC1G_12313	166797	1536	3.82726	1.33781	-1.51644	hypothetical protein	0.00035
CC1G_15400	502619	1218	49.6366	22.4667	-1.14362	hypothetical protein	5e-05
CC1G_11518	468186	994	246.907	90.1697	-1.45325	hypothetical protein	5e-05
CC1G_11523	167510	1113	70.1047	33.0626	-1.08431	hypothetical protein	5e-05
CC1G_11525	502639	1305	3144.09	392.795	-3.00079	prenyl diphosphate phosphatase	5e-05
CC1G_12461	380219	1190	7.82461	22.6395	1.53275	hypothetical protein	5e-05
CC1G_08398	445027	1554	0.838923	2.03794	1.2805	hypothetical protein	0.00305
CC1G_04112	468224	1332	4.96396	11.1631	1.16917	hypothetical protein	5e-05
CC1G_04111	445060	1312	12.6292	64.8421	2.36017	hypothetical protein	5e-05
CC1G_04116	408694	960	46.0231	127.447	1.46947	glutathione S-transferase Gst3	5e-05
CC1G_04114	380312	3128	33.8343	12.9513	-1.3854	cytoplasmic protein	5e-05
CC1G_04790	434690	980	23.4166	4.17344	-2.48823	hypothetical protein	5e-05
CC1G_04779	445063	2619	3.6557	16.0519	2.13452	hypothetical protein	5e-05
CC1G_15798	168487	1233	86.9355	35.6675	-1.28534	metallo-beta-lactamase superfamily protein	5e-05
CC1G_04763	456752	2083	1.51995	78.0968	5.68317	hypothetical protein	5e-05
CC1G_04762	476986	1915	2.34716	32.5835	3.79515	hypothetical protein	5e-05
CC1G_04735	393477	1965	13.0254	50.0072	1.94081	hypothetical protein	5e-05
CC1G_04729	445136	699	0.434264	3.74202	3.10717	hypothetical protein	0.0056
CC1G_04741	169662	2309	75.9684	10.4227	-2.86567	TKL/TKL-ccin protein kinase	5e-05
CC1G_10192	521771	2220	59.5349	123.017	1.04705	glucan 1,3-beta-glucosidase	5e-05
CC1G_10191	169822	657	77.4263	33.6015	-1.2043	hypothetical protein	5e-05
CC1G_15125	380330	2524	15.5463	5.12472	-1.60102	other/FunK1 protein kinase	5e-05
CC1G_02398	457896	588	19.9284	219.114	3.45878	hypothetical protein	5e-05
CC1G_05932	170197	2385	33.5129	72.8065	1.11935	hypothetical protein	5e-05
CC1G_07461	170477	1013	53.6722	125.44	1.22475	hypothetical protein	5e-05
CC1G_07466	170517	750	8.96139	20.8466	1.21802	hypothetical protein	0.00045
CC1G_07467	456820	1914	14.8122	59.2099	1.99905	hypothetical protein	5e-05
CC1G_07462	170559	1882	0.769428	2.49576	1.69762	protein kinase subdomain-containing protein PKL/CAK/Fmp29	0.0002
CC1G_12388	483091	1832	181.872	402.255	1.14519	endoglucanase-4	5e-05
CC1G_09029	170751	540	79.4743	39.4757	-1.00953	hypothetical protein	5e-05
CC1G_09037	456831	729	439.41	68.5038	-2.68131	hypothetical protein	5e-05
CC1G_11778	502742	420	2.4304	231.514	6.57377	hypothetical protein	0.0026
CC1G_11786	456849	740	784.66	184.096	-2.09161	hypothetical protein	5e-05
CC1G_14729	445231	1044	3.09328	8.84003	1.51491	hypothetical protein	5e-05
CC1G_12575	522143	1581	6.73769	15.0064	1.15525	hexose transporter	5e-05
CC1G_12147	496081	1103	15.3834	67.7813	2.13951	hypothetical protein	5e-05
CC1G_07928	445367	979	7.40172	44.1922	2.57786	hypothetical protein	5e-05
CC1G_07927	445317	936	15.3717	42.034	1.45128	hypothetical protein	5e-05
CC1G_07924	445318	1130	6.55432	16.8683	1.36379	hypothetical protein	5e-05
CC1G_12151	445322	2590	1.81776	5.40857	1.57308	other/FunK1 protein kinase	5e-05
CC1G_05382	393662	669	20.8514	2.84549	-2.87339	cellulose-growth-specific protein	5e-05
CC1G_05381	380579	1047	1165.39	151.371	-2.94465	hypothetical protein	5e-05
CC1G_15188	502782	807	6.78605	18.5302	1.44924	hypothetical protein	5e-05
CC1G_07644	419850	1569	62.5323	180.783	1.53158	hexose transporter	5e-05
CC1G_07636	496145	2355	192.232	68.1905	-1.4952	copper radical oxidase variant A	5e-05
CC1G_07627	457039	1950	10.5279	21.7681	1.048	FLU1-II	5e-05
CC1G_07619	445494	1560	3.48487	7.577	1.12052	hypothetical protein	0.00035
CC1G_07673	363637	585	45.8827	17.0769	-1.42591	hypothetical protein	5e-05
CC1G_07647	363609	1227	0.640401	13.1924	4.36459	hypothetical protein	0.0001
CC1G_07631	496142	846	5.36754	11.885	1.14681	hypothetical protein	0.0004
CC1G_07119	497233	1944	158.307	30.6635	-2.36813	malate dehydrogenase	5e-05
CC1G_09039	380777	1557	36.8303	15.1452	-1.28203	hypothetical protein	5e-05
CC1G_12868	457067	851	0.29833	13.7458	5.52594	hypothetical protein	0.0026
CC1G_02564	435051	2038	328.864	148.522	-1.14681	heat shock protein	5e-05
CC1G_12854	546731	1928	119.179	25.0847	-2.24825	metallo-beta-lactamase	5e-05
CC1G_12851	435066	867	83.599	11.2261	-2.89663	DUF1264 domain-containing protein	5e-05
CC1G_01373	409075	732	312.007	130.938	-1.2527	hypothetical protein	5e-05
CC1G_01372	380844	1060	59.5397	18.0032	-1.7256	hypothetical protein	5e-05
CC1G_08834	445561	4554	2.98035	1.47254	-1.01718	hypothetical protein	0.0001
CC1G_08837	445595	1440	3.20393	6.73151	1.07109	hypothetical protein	0.00045
CC1G_13340	445604	2285	10.6535	24.803	1.21919	pyranose dehydrogenase	5e-05
CC1G_04172	469764	1471	29.9985	6.04664	-2.31069	hypothetical protein	5e-05
CC1G_09225	546783	1371	177.166	520.747	1.55548	hypothetical protein	0.00035
CC1G_09235	178147	1838	57.7994	12.6926	-2.18707	hypothetical protein	5e-05
CC1G_09238	178424	1371	3.80165	1.7766	-1.0975	phosphatidylserine decarboxylase	0.0017
CC1G_09240	457157	1762	657.204	276.196	-1.25065	phosphatidylserine decarboxylase	5e-05
CC1G_09241	178286	1350	279.655	1196.79	2.09744	phosphatidylserine decarboxylase	5e-05
CC1G_09242	496199	2154	1.54119	4.0695	1.4008	hypothetical protein	5e-05
CC1G_09248	477156	1355	29.2553	75.7903	1.37331	hypothetical protein	5e-05
CC1G_12360	178694	1673	104.636	220.779	1.07723	hypothetical protein	5e-05
CC1G_12363	445665	469	13.8673	33.3975	1.26805	hypothetical protein	0.0003
CC1G_04080	523102	411	266.753	28.1158	-3.24605	hypothetical protein	5e-05
CC1G_05949	502944	608	20.8731	8.90247	-1.22937	ankrin repeat containing protein	0.00015
CC1G_04165	179410	2035	58.681	16.141	-1.86216	cytoplasmic protein	5e-05
CC1G_10244	445701	1635	14.4657	5.85923	-1.30385	hypothetical protein	5e-05
CC1G_10245	445716	2211	285.653	80.7359	-1.82298	hypothetical protein	5e-05
CC1G_15483	435263	1946	6.91418	20.6043	1.57532	hypothetical protein	5e-05
CC1G_04069	523274	1377	3.28229	9.22905	1.49148	hypothetical protein	5e-05
CC1G_03861	502989	2238	31.1766	79.3147	1.34712	high affinity sulfate permease	5e-05
CC1G_03890	363967	2214	175.966	29.1896	-2.59177	catalase	5e-05
CC1G_03903	420157	543	58.7364	13.3346	-2.13908	hypothetical protein	5e-05
CC1G_13974	496267	1316	156.645	64.271	-1.28526	quinone oxidoreductase	5e-05
CC1G_13975	445846	1214	54.8234	19.3506	-1.50241	quinone oxidoreductase-like protein	5e-05
CC1G_03921	445848	1374	297.683	40.7658	-2.86835	hypothetical protein	5e-05
CC1G_03858	445849	888	66.4023	162.487	1.29102	sorbose reductase sou1	5e-05
CC1G_03859	363846	927	226.135	57.8823	-1.96599	hypothetical protein	5e-05
CC1G_03884	180813	1210	1.45613	4.1189	1.50012	hypothetical protein	0.00135
CC1G_02626	420143	2004	2.43291	6.11788	1.33035	hypothetical protein	5e-05
CC1G_07472	445874	2411	1.26958	3.50466	1.46493	hypothetical protein	5e-05
CC1G_10444	546877	2021	12.2639	26.889	1.1326	hypothetical protein	5e-05
CC1G_10446	546885	2100	554.727	214.69	-1.36952	mala s 12 allergen	5e-05
CC1G_05707	381351	666	5.33445	14.6171	1.45425	hypothetical protein	0.00045
CC1G_05683	445964	2523	59.7933	125.141	1.06549	hypothetical protein	5e-05
CC1G_11734	468958	1369	45.0802	18.1719	-1.31079	conjugated polyketone reductase C1	5e-05
CC1G_11726	546889	3177	267.955	98.8431	-1.43878	trehalose-phosphatase	5e-05
CC1G_05967	503099	4940	1.72711	3.97242	1.20166	hypothetical protein	5e-05
CC1G_12509	546898	965	4.745	10.1162	1.09219	hypothetical protein	0.0002
CC1G_12506	445992	951	2.50947	5.40267	1.10629	hypothetical protein	0.004
CC1G_14779	381384	1807	22.2917	281.597	3.65905	hypothetical protein	5e-05
CC1G_06953	446025	681	9.04569	4.46879	-1.01735	hypothetical protein	0.00535
CC1G_06946	477298	1311	495.409	27.5482	-4.16859	hypothetical protein	5e-05
CC1G_15545	496355	1431	45.0694	7.83178	-2.52474	hypothetical protein	5e-05
CC1G_06924	394290	2088	48.5263	103.423	1.09171	hypothetical protein	5e-05
CC1G_06912	446075	832	12.611	1.02836	-3.61627	hypothetical protein	0.00035
CC1G_06908	394357	1302	1.5858	3.3311	1.07079	hypothetical protein	0.0058
CC1G_06913	496393	1023	4.70559	2.26722	-1.05345	hypothetical protein	0.004
CC1G_08580	496388	1512	7.87343	2.13368	-1.88365	lipase I	5e-05
CC1G_08583	469133	756	5.62378	2.69561	-1.06093	hypothetical protein	0.0074
CC1G_12490	503190	2319	43.6683	88.9786	1.02687	OPT oligopeptide transporter	5e-05
CC1G_04815	496395	621	11.5731	4.28584	-1.43313	hypothetical protein	0.00145
CC1G_04797	469199	1398	1.18676	4.92466	2.053	cytochrome P450	5e-05
CC1G_06654	364305	864	2.81098	19.4597	2.79135	hypothetical protein	5e-05
CC1G_02230	381690	1116	25.3561	5.05527	-2.32647	hypothetical protein	5e-05
CC1G_10863	487400	970	435.599	157.257	-1.46988	hypothetical protein	5e-05
CC1G_10810	546971	891	71.092	32.9779	-1.10819	hypothetical protein	5e-05
CC1G_01973	503250	2214	294.239	81.2109	-1.85724	glycogen synthase	5e-05
CC1G_01959	457685	972	92.5675	40.8834	-1.17899	hypothetical protein	0.00865
CC1G_01949	493182	1491	75.9175	26.5225	-1.51722	hypothetical protein	5e-05
CC1G_11816	469299	1174	61.816	25.0721	-1.3019	D-glycerate 3-kinase	5e-05
CC1G_12093	538057	1387	14.8813	40.2998	1.43727	glycosyl hydrolase family 16	5e-05
CC1G_12089	524741	609	666.72	172.476	-1.95069	hypothetical protein	5e-05
CC1G_01956	356026	2085	17.977	40.7463	1.18052	AMP binding protein	5e-05
CC1G_01916	371011	1560	13.0195	47.072	1.85419	614/534 cytochrome P450	5e-05
CC1G_01903	355877	942	283.389	135.439	-1.06514	hypothetical protein	5e-05
CC1G_14164	355684	1096	1.7422	9.39609	2.43115	hypothetical protein	5e-05
CC1G_14163	412828	1848	13.1113	28.2647	1.10819	tyrosinase	5e-05
CC1G_09354	493277	1470	44.915	102.6	1.19176	hypothetical protein	5e-05
CC1G_09339	469425	663	493.648	130.603	-1.9183	hypothetical protein	5e-05
CC1G_09329	469441	1830	40.294	18.4513	-1.12684	CAMK/CAMKL/PASK protein kinase	5e-05
CC1G_12075	538093	930	3.48602	1.50419	-1.21259	hypothetical protein	0.006
CC1G_12164	496451	786	23.2184	66.1484	1.51044	hypothetical protein	5e-05
CC1G_02887	469497	2430	55.9184	25.9477	-1.10771	Cullin-4B	5e-05
CC1G_08824	364376	1286	485.922	75.6405	-2.68349	hypothetical protein	5e-05
CC1G_12058	486833	1494	13.1496	35.8302	1.44615	hypothetical protein	5e-05
CC1G_02886	469490	1119	273.586	85.4932	-1.67811	hypothetical protein	5e-05
CC1G_10893	469505	2015	3.65213	34.8501	3.25435	beta-lactamase	5e-05
CC1G_12265	446585	510	1193.57	221.329	-2.43102	hypothetical protein	5e-05
CC1G_12266	381859	926	1235.8	211.453	-2.54703	hypothetical protein	5e-05
CC1G_12264	483457	681	703.052	80.4468	-3.12752	hypothetical protein	5e-05
CC1G_06115	381851	2163	434.861	153.72	-1.50025	acyl-CoA synthetase	5e-05
CC1G_10656	381907	849	108.073	45.3408	-1.25312	hypothetical protein	5e-05
CC1G_10632	496499	1398	6.15814	1.08733	-2.5017	FAD binding domain-containing protein	5e-05
CC1G_08173	469608	2194	13.7057	31.8578	1.21687	hypothetical protein	5e-05
CC1G_08160	199356	2178	129.351	50.5396	-1.3558	nuclear protein	5e-05
CC1G_10303	477469	783	198.14	486.696	1.2965	hypothetical protein	5e-05
CC1G_05977	503366	2013	1.81737	4.67213	1.36223	hypothetical protein	5e-05
CC1G_10013	446736	836	82.6134	28.1335	-1.55408	hypothetical protein	5e-05
CC1G_10008	446745	405	13.0168	4.29925	-1.59822	hypothetical protein	0.01005
CC1G_10009	200136	1107	11.0294	3.72222	-1.56711	hypothetical protein	5e-05
CC1G_10150	483196	827	2.52075	227.574	6.49634	hypothetical protein	5e-05
CC1G_03536	541071	2000	14.7513	30.9392	1.06859	hypothetical protein	5e-05
CC1G_03540	446791	1014	143.754	55.4763	-1.37366	haloacid dehalogenase	5e-05
CC1G_03562	496556	1713	3.71569	31.5715	3.08692	cytochrome P450 98A3	5e-05
CC1G_03564	201523	1836	1.75146	29.5971	4.07883	cytochrome P450	5e-05
CC1G_03577	420898	2314	5.20248	17.6058	1.75878	multidrug resistance protein 4	5e-05
CC1G_03585	420930	640	11.1849	24.1911	1.11293	fungal mating-type pheromone	0.00015
CC1G_03592	446846	495	124.298	38.7585	-1.68121	hypothetical protein	5e-05
CC1G_03593	394838	192	2676.84	1229.27	-1.12273	hypothetical protein	0.0001
CC1G_03594	496605	219	462.85	69.1101	-2.74358	hypothetical protein	0.00175
CC1G_03545	364719	1551	35.1358	4.60965	-2.93022	EXS family protein/ERD1/XPR1/SYG1 family protein	5e-05
CC1G_03553	364664	2454	48.0875	20.17	-1.25345	YagE family protein	5e-05
CC1G_12008	364667	741	280.162	110.637	-1.34043	hypothetical protein	5e-05
CC1G_04160	382134	2055	34.846	6.92071	-2.332	hypothetical protein	5e-05
CC1G_02086	469769	684	27.5401	12.5526	-1.13355	hypothetical protein	5e-05
CC1G_02106	496610	954	23.992	2.65003	-3.17847	hypothetical protein	5e-05
CC1G_02113	421013	824	1.23078	3.92762	1.67409	hypothetical protein	0.00605
CC1G_02118	446936	1156	2.01437	84.1613	5.38476	hypothetical protein	5e-05
CC1G_15342	541145	1946	0.979758	21.7536	4.47269	membrane transporter	5e-05
CC1G_15343	203952	1593	2.38169	12.9101	2.43844	membrane transporter	5e-05
CC1G_02095	364886	960	542.747	45.4278	-3.57863	hypothetical protein	5e-05
CC1G_02115	469791	903	32.4	14.321	-1.17786	hypothetical protein	5e-05
CC1G_02132	203560	435	29.6421	111.996	1.91773	pheromone Phb2.2 B44	5e-05
CC1G_02143	446955	1464	21.5002	10.1239	-1.08659	hypothetical protein	5e-05
CC1G_07490	496654	819	30.2745	12.1693	-1.31486	hypothetical protein	5e-05
CC1G_05607	410020	462	36.9933	75.9982	1.0387	hypothetical protein	0.0001
CC1G_05535	458198	1163	15.8171	5.55739	-1.50901	hypothetical protein	5e-05
CC1G_15713	447008	333	885.388	270.096	-1.71284	hypothetical protein	5e-05
CC1G_11334	469939	1909	111.248	50.7712	-1.1317	hypothetical protein	5e-05
CC1G_11341	395026	1195	49.2725	22.5933	-1.12489	hypothetical protein	5e-05
CC1G_10883	205173	1931	70.6817	143.32	1.01983	hypothetical protein	5e-05
CC1G_10890	205235	605	66.7205	27.0938	-1.30017	histidinol-phosphate transaminase	5e-05
CC1G_01484	205517	1009	1.35657	15.4838	3.51272	hypothetical protein	5e-05
CC1G_03134	410069	431	27.4826	2.86203	-3.2634	hypothetical protein	0.00085
CC1G_15555	447085	2010	3.65156	0.606014	-2.59109	NA	5e-05
CC1G_10491	382440	860	14.5051	4.18464	-1.79339	hypothetical protein	5e-05
CC1G_10494	447099	1131	0.444773	3.50859	2.97975	hypothetical protein	0.0109
CC1G_10497	469992	1259	9.11142	20.4878	1.16902	hypothetical protein	5e-05
CC1G_05776	487021	1128	62.4072	8.36199	-2.89979	ycaC protein	5e-05
CC1G_05794	421260	985	6.53864	42.1147	2.68726	hypothetical protein	5e-05
CC1G_05798	395141	1824	60.5096	15.5637	-1.95897	hypothetical protein	5e-05
CC1G_05777	447153	1407	38.6115	12.0813	-1.67626	hypothetical protein	5e-05
CC1G_05778	365034	756	625.325	245.606	-1.34826	ycaC protein	5e-05
CC1G_05779	447136	1201	1.61134	12.685	2.9768	hypothetical protein	5e-05
CC1G_05806	487037	2930	4.50178	9.16316	1.02535	hypothetical protein	5e-05
CC1G_01606	447162	750	1.56133	4.82363	1.62734	hypothetical protein	0.00755
CC1G_06195	382510	1839	58.3916	17.2641	-1.75799	hypothetical protein	5e-05
CC1G_02441	458381	970	105.999	263.269	1.31249	hypothetical protein	5e-05
CC1G_02447	447242	1556	26.6805	4.34705	-2.61768	hypothetical protein	5e-05
CC1G_02460	395233	469	17.3872	4.04402	-2.10416	hypothetical protein	0.00725
CC1G_02464	421367	2118	52.6318	24.148	-1.12403	exo-beta-1,3-glucanase	5e-05
CC1G_07569	470128	5083	315.051	151.091	-1.06017	calcium-transporting ATPase	5e-05
CC1G_10757	547195	3273	143.144	67.7558	-1.07905	ATP-dependent permease	5e-05
CC1G_05052	503625	1820	19.6024	53.7483	1.45519	trichothecene 3-O-acetyltransferase	5e-05
CC1G_05048	447350	1854	6.13036	101.004	4.04229	cyclopropane-fatty-acyl-phospholipid synthase	5e-05
CC1G_05054	365330	1611	20.039	9.1232	-1.1352	hypothetical protein	5e-05
CC1G_15053	496821	1635	45.827	99.1163	1.11292	hypothetical protein	5e-05
CC1G_15052	365306	960	29.3901	72.3887	1.30043	hypothetical protein	5e-05
CC1G_05026	365363	4248	1.74561	3.6435	1.06159	hypothetical protein	5e-05
CC1G_14241	496848	1785	173.161	62.5504	-1.46902	STE/STE7 protein kinase	5e-05
CC1G_00436	503676	3171	36.5047	81.6597	1.16154	assimilatory sulfite reductase	5e-05
CC1G_00449	496856	983	82.1183	22.732	-1.85298	chaperone	5e-05
CC1G_00451	211996	646	253.414	68.5039	-1.88724	hypothetical protein	5e-05
CC1G_01264	211948	824	63.153	25.3913	-1.31452	hypothetical protein	0.00925
CC1G_00462	213255	1458	174.546	77.3014	-1.17504	hypothetical protein	5e-05
CC1G_00463	365536	1431	163.405	47.7448	-1.77504	hypothetical protein	5e-05
CC1G_14664	496885	684	47.6987	18.6962	-1.35121	hypothetical protein	5e-05
CC1G_01359	526900	2049	324.71	138.399	-1.23032	1,4-alpha-glucan branching enzyme	5e-05
CC1G_01355	365699	1923	194.364	64.2067	-1.59797	calcium activated cation channel	5e-05
CC1G_14678	421680	1809	56.1072	17.9847	-1.64141	glucosidase	5e-05
CC1G_01328	496928	523	1186.66	333.231	-1.83231	hypothetical protein	5e-05
CC1G_14670	214528	675	34.8904	8.3759	-2.05851	hypothetical protein	5e-05
CC1G_10240	365678	1747	60.3327	15.9509	-1.9193	hypothetical protein	5e-05
CC1G_10239	447609	1799	17.1616	6.41995	-1.41855	hypothetical protein	5e-05
CC1G_10238	547264	967	9.87012	4.14756	-1.25081	hypothetical protein	0.0003
CC1G_10470	547265	1433	1.41717	14.7171	3.3764	hypothetical protein	5e-05
CC1G_04911	527180	1030	4.146	1.76302	-1.23367	hypothetical protein	0.002
CC1G_02962	447616	1887	68.9093	166.817	1.27549	hypothetical protein	5e-05
CC1G_02964	458752	915	31.0267	11.5985	-1.41958	hypothetical protein	5e-05
CC1G_12127	413091	1526	9.38574	35.0051	1.89902	hypothetical protein	5e-05
CC1G_05881	482207	3504	47.5136	21.4325	-1.14854	rho guanine nucleotide exchange factor	5e-05
CC1G_08359	447756	1383	5.28576	11.4727	1.11803	hypothetical protein	5e-05
CC1G_08349	356147	915	28.2755	14.0075	-1.01336	hypothetical protein	5e-05
CC1G_02932	474503	5223	66.6931	18.7254	-1.83254	SPO14	5e-05
CC1G_05899	356178	1999	12.6405	27.322	1.11202	hypothetical protein	5e-05
CC1G_08374	386989	1000	90.1096	17.6868	-2.34901	hypothetical protein	5e-05
CC1G_08368	387038	2326	117.133	53.1633	-1.13964	sorting nexin-41	5e-05
CC1G_08364	447765	1587	18.4961	57.6327	1.63967	lanosterol 14-alpha-demethylase	5e-05
CC1G_08363	470565	628	9.08227	71.6374	2.97959	hypothetical protein	5e-05
CC1G_14894	413238	417	58.9718	26.2406	-1.16823	hypothetical protein	5e-05
CC1G_08333	413263	1727	133.417	62.4059	-1.09619	multidrug transporter	5e-05
CC1G_08328	447793	1116	318.884	113.857	-1.48581	coproporphyrinogen III oxidase	5e-05
CC1G_08675	356151	1137	63.5608	22.6444	-1.48899	hypothetical protein	5e-05
CC1G_08680	527694	2556	17.2298	70.3616	2.02988	hypothetical protein	5e-05
CC1G_09024	220737	1690	0.489087	5.13336	3.39174	hypothetical protein	5e-05
CC1G_07205	447864	680	2.44989	9.37514	1.93612	hypothetical protein	0.00055
CC1G_11387	547282	1993	6.54786	289.465	5.46622	cyclopropane-fatty-acyl-phospholipid synthase	5e-05
CC1G_12498	447925	1654	1.52414	3.25936	1.09659	cytochrome P450	0.0027
CC1G_03144	547287	1922	69.7881	23.5214	-1.56901	hypothetical protein	5e-05
CC1G_03147	395925	1347	6.38717	14.5591	1.18868	hypothetical protein	5e-05
CC1G_03185	497064	1690	1.83364	4.21255	1.19998	hypothetical protein	0.0004
CC1G_03146	448025	725	116.077	730.047	2.65291	hypothetical protein	5e-05
CC1G_03156	447968	1352	6.85973	3.13659	-1.12895	hypothetical protein	0.0002
CC1G_03158	222923	615	14.6307	95.7733	2.71063	hypothetical protein	5e-05
CC1G_03168	395952	1540	3.34566	1.11759	-1.5819	hypothetical protein	5e-05
CC1G_03181	477981	6225	7.65712	19.8622	1.37515	hypothetical protein	5e-05
CC1G_12376	366047	1041	4.87863	1.52282	-1.67973	hypothetical protein	0.00035
CC1G_11184	470843	1908	79.3324	19.4662	-2.02694	hypothetical protein	5e-05
CC1G_12375	396082	1398	34.2729	73.3179	1.0971	hypothetical protein	5e-05
CC1G_09770	366201	2199	566.462	105.569	-2.42379	mala s 12 allergen	5e-05
CC1G_10881	366283	991	12.9448	3.44458	-1.90997	protein kinase subdomain-containing protein PKL/ccin3	5e-05
CC1G_10865	541618	483	68.9259	30.4501	-1.1786	hypothetical protein	5e-05
CC1G_02245	470919	1170	35.2086	6.48769	-2.44015	hypothetical protein	5e-05
CC1G_12690	448156	2400	34.8457	15.9271	-1.1295	hypothetical protein	5e-05
CC1G_10853	225541	1126	4.45328	23.1833	2.38015	hypothetical protein	5e-05
CC1G_13275	422304	1795	1.69627	0.401534	-2.07877	hypothetical protein	0.00345
CC1G_03436	410504	1552	159.558	49.4031	-1.69141	aldo-keto reductase	5e-05
CC1G_03464	226525	2015	30.1	85.0143	1.49794	centromere binding protein B	5e-05
CC1G_03453	528616	2383	916.412	102.552	-3.15965	pyruvate decarboxylase	5e-05
CC1G_06698	422402	1190	0.620893	78.3013	6.97855	hypothetical protein	0.0001
CC1G_06692	528682	520	450.033	69.5564	-2.69378	hypothetical protein	5e-05
CC1G_06684	541708	507	12.0659	75.2176	2.64013	hypothetical protein	5e-05
CC1G_06679	422563	2064	1.50842	7.01243	2.21687	hypothetical protein	5e-05
CC1G_08955	471069	2245	0.816182	8.07815	3.30706	hypothetical protein	5e-05
CC1G_11639	228855	942	63.9918	27.6285	-1.21173	hypothetical protein	5e-05
CC1G_11630	422611	1064	3.03739	22.5508	2.89227	hypothetical protein	5e-05
CC1G_07866	422636	1026	144.201	24.9737	-2.5296	DnaJ protein	5e-05
CC1G_14364	448354	991	940.756	149.862	-2.65018	hypothetical protein	5e-05
CC1G_13274	528942	2257	43.5502	17.6504	-1.30297	hypothetical protein	5e-05
CC1G_06403	231198	1853	2.56553	5.63349	1.13477	acyl-CoA dehydrogenase	0.0002
CC1G_10970	231248	1042	146.367	63.2159	-1.21124	hypothetical protein	5e-05
CC1G_10984	396722	2708	123.29	324.909	1.39799	hypothetical protein	5e-05
CC1G_05222	233439	960	131.715	49.7949	-1.40335	hypothetical protein	5e-05
CC1G_10969	497414	1312	211.295	85.0013	-1.3137	hypothetical protein	5e-05
CC1G_15684	541839	2124	34.7713	13.4053	-1.3751	other/IKS protein kinase	5e-05
CC1G_05210	366853	1733	2.84482	7.66653	1.43024	cytochrome P450	5e-05
CC1G_07384	448488	1884	20.3914	47.0021	1.20476	amidohydrolase	5e-05
CC1G_14216	356480	1206	425.107	177.139	-1.26294	hypothetical protein	5e-05
CC1G_02032	493517	1419	55.4388	26.3214	-1.07466	amino acid permease	5e-05
CC1G_02011	356458	1742	28.346	12.378	-1.19536	triacylglycerol lipase	0.00025
CC1G_14207	474662	2184	2.84891	15.3663	2.43129	heat shock protein	5e-05
CC1G_02063	471361	1707	625.75	281.416	-1.15288	phosphoenolpyruvate carboxykinase	5e-05
CC1G_02026	493553	678	570.105	277.962	-1.03634	rho small monomeric GTPase	5e-05
CC1G_02002	471407	2022	39.7243	17.8294	-1.15576	phospholipid:diacylglycerol acyltransferase	5e-05
CC1G_02613	493617	1173	24.2918	49.1141	1.01567	hypothetical protein	5e-05
CC1G_02594	366941	1403	24.9624	2.89384	-3.1087	carbamoylphosphate synthase large subunit	5e-05
CC1G_02593	448736	395	157.201	74.8858	-1.06984	hypothetical protein	5e-05
CC1G_02605	448738	969	110.894	51.425	-1.10864	mixed-linked glucanase	5e-05
CC1G_02604	422937	1136	2.43121	5.68756	1.22614	endo-1,3[4]-beta-glucanase	0.00135
CC1G_02603	396822	1595	66.3018	32.7572	-1.01724	hypothetical protein	5e-05
CC1G_02590	541880	1191	0.387932	1.81728	2.22791	delta 12 fatty acid epoxygenase	0.0065
CC1G_02587	471478	619	337.545	16.09	-4.39084	hypothetical protein	5e-05
CC1G_02580	487630	1209	89.6725	190.75	1.08894	farnesyldiphosphatesynthetase	5e-05
CC1G_15006	459666	561	825.614	391.036	-1.07817	hypothetical protein	5e-05
CC1G_02913	367102	1011	1.35747	3.24105	1.25554	hypothetical protein	0.00815
CC1G_02897	471523	2052	80.8236	20.7901	-1.95888	hypothetical protein	5e-05
CC1G_02915	367057	2664	15.0164	32.8475	1.12924	hypothetical protein	5e-05
CC1G_10892	530020	1524	395.398	103.723	-1.93057	hypothetical protein	5e-05
CC1G_10891	504063	815	52.5981	18.5406	-1.50432	hypothetical protein	5e-05
CC1G_13124	436619	223	14.6062	116.248	2.99255	ammonium transporter	0.00675
CC1G_06639	504066	1121	13.4124	58.8261	2.13289	hypothetical protein	5e-05
CC1G_11111	397077	945	10.9047	2.49714	-2.12661	4-hydroxybenzoate polyprenyl transferase	5e-05
CC1G_06634	471585	762	30.9798	110.711	1.8374	hypothetical protein	5e-05
CC1G_02347	497531	2186	13.9907	28.3611	1.01945	hypothetical protein	5e-05
CC1G_02368	448894	1146	1.50011	4.49683	1.58384	hypothetical protein	0.00035
CC1G_02329	478454	1566	248.351	36.756	-2.75633	phthalate transporter	5e-05
CC1G_02341	367246	919	199.554	4.22806	-5.56064	small heat shock protein	5e-05
CC1G_02345	423239	1961	9.73798	2.69452	-1.85359	malate synthase	5e-05
CC1G_02365	530292	837	94.7853	190.423	1.00647	hypothetical protein	5e-05
CC1G_00647	497575	1086	7.37642	65.3255	3.14665	hypothetical protein	5e-05
CC1G_00645	459848	978	4.50636	53.9821	3.58245	hypothetical protein	5e-05
CC1G_00643	367347	798	87.2974	16.3738	-2.41455	hypothetical protein	5e-05
CC1G_00642	367403	1290	7.95742	2.24221	-1.82738	hypothetical protein	5e-05
CC1G_00628	530431	1348	1.5851	3.81671	1.26776	hypothetical protein	0.0013
CC1G_00620	397232	1469	284.205	106.909	-1.41056	myo inositol monophosphatase	5e-05
CC1G_07582	397251	870	1.89018	11.3756	2.58934	hypothetical protein	5e-05
CC1G_07581	367542	645	48.3361	6.79083	-2.83144	hypothetical protein	5e-05
CC1G_07571	367485	1753	471.34	165.059	-1.51379	alpha,alpha-trehalose-phosphate synthase [UDP-forming]t	5e-05
CC1G_07609	478544	852	14.9718	35.4205	1.24233	hypothetical protein	5e-05
CC1G_07604	343248	4790	7.42122	28.4394	1.93817	ABC transporter	5e-05
CC1G_07904	448997	1056	18.0061	39.8386	1.14568	hypothetical protein	5e-05
CC1G_02670	408747	1535	753.579	186.415	-2.01524	hypothetical protein	5e-05
CC1G_14318	247679	2136	34.7106	16.9648	-1.03284	hypothetical protein	5e-05
CC1G_02645	449084	1350	111.773	50.3008	-1.15193	peptidase M48 family protein	5e-05
CC1G_02630	248257	2147	153.837	440.128	1.51652	sugar transporter	5e-05
CC1G_02628	487841	1547	69.0035	3.58208	-4.2678	hypothetical protein	5e-05
CC1G_02675	449111	1644	4.67071	11.3889	1.28592	hypothetical protein	5e-05
CC1G_02661	423503	1341	227.647	66.7174	-1.77066	hypothetical protein	5e-05
CC1G_02634	247890	870	473.703	45.3773	-3.38394	hypothetical protein	5e-05
CC1G_00898	248435	2110	170.942	78.9584	-1.11435	hypothetical protein	5e-05
CC1G_14833	449121	246	519.435	74.616	-2.79939	hypothetical protein	5e-05
CC1G_00940	471848	1533	14.0567	5.55633	-1.33905	monooxygenase	5e-05
CC1G_00844	471871	3442	54.8095	157.608	1.52384	heme peroxidase	5e-05
CC1G_14823	423716	1890	886.815	168.714	-2.39405	R,R-butanediol dehydrogenase	5e-05
CC1G_00866	423732	1752	447.394	182.526	-1.29344	phosphoglucomutase	5e-05
CC1G_03126	483691	588	10.1412	3.06425	-1.72663	hypothetical protein	0.0027
CC1G_09480	460099	453	3.55086	28.0262	2.98054	hypothetical protein	0.00025
CC1G_09484	367957	1807	4.33284	1.90471	-1.18574	hypothetical protein	0.0005
CC1G_09488	449260	1825	1.8953	0.746146	-1.3449	hypothetical protein	0.00115
CC1G_09477	397741	2381	1.33519	3.86107	1.53196	beta-glucosidase	5e-05
CC1G_15606	542232	1647	12.3593	31.2252	1.33712	hypothetical protein	5e-05
CC1G_00562	367980	4551	31.4741	109.547	1.79931	ABC-transporter	5e-05
CC1G_00517	474705	1254	19.1961	109.925	2.51763	salicylate hydroxylase	5e-05
CC1G_00493	357054	486	51.8125	18.8661	-1.45751	hypothetical protein	5e-05
CC1G_00492	357027	1932	52.1607	19.954	-1.38629	trans-hexaprenyltranstransferase	5e-05
CC1G_00479	254738	3008	181.924	90.8976	-1.00102	heterokaryon incompatibility protein HET-C	5e-05
CC1G_00577	413970	1328	769.298	235.324	-1.7089	CMGC/MAPK protein kinase	5e-05
CC1G_13741	449305	3312	84.5372	37.5781	-1.1697	biotin/lipoyl attachment:Carbamoyl-phosphate synthase subunit L	5e-05
CC1G_00509	472012	493	31.2978	63.2755	1.01559	hypothetical protein	0.00015
CC1G_00506	449397	1044	87.1219	25.6779	-1.76251	bax Inhibitor family protein	5e-05
CC1G_06622	472061	1998	14.8446	37.9002	1.35227	hypothetical protein	5e-05
CC1G_13723	493748	1104	557.107	152.693	-1.86732	hypothetical protein	5e-05
CC1G_03941	472122	1770	26.7339	13.2215	-1.01579	pyranose dehydrogenase	5e-05
CC1G_03930	497900	726	14.8409	3.51979	-2.07602	hypothetical protein	5e-05
CC1G_10435	424071	1098	1.02587	4.50048	2.13323	hypothetical protein	0.0004
CC1G_03949	497919	1338	3.89396	45.3285	3.54111	salicylate hydroxylase	5e-05
CC1G_03937	472182	375	1.50427	27.6183	4.19849	hypothetical protein	0.0026
CC1G_03935	397943	1239	6.22555	2.41167	-1.36817	hypothetical protein	0.0002
CC1G_10428	424061	1472	34.2459	117.332	1.7766	hypothetical protein	5e-05
CC1G_15428	449563	1840	0.195514	10.186	5.70318	hypothetical protein	0.0007
CC1G_11294	449612	1889	26.4886	11.5038	-1.20326	hypothetical protein	5e-05
CC1G_11293	259470	2274	4.37397	2.05579	-1.08925	hypothetical protein	0.0002
CC1G_12661	460394	1665	32.7051	76.4111	1.22427	hypothetical protein	5e-05
CC1G_10537	472279	1380	76.1675	170.232	1.16026	d-3-phosphoglycerate dehydrogenase 2	5e-05
CC1G_08843	472299	939	1.13673	3.93339	1.79088	hypothetical protein	0.0024
CC1G_08869	478878	630	61.6459	23.262	-1.40603	hypothetical protein	5e-05
CC1G_09713	368457	1254	109.366	47.5707	-1.20102	hypothetical protein	5e-05
CC1G_09706	498062	1329	30.1512	14.2197	-1.08432	hypothetical protein	5e-05
CC1G_09704	398354	1933	189.425	30.267	-2.6458	choline-phosphate cytidylyltransferase	5e-05
CC1G_09703	398357	1539	13.785	50.8508	1.88317	high nitrogen upregulated cytochrome P450 monooxygenase 2	5e-05
CC1G_09698	368611	1775	39.1188	4.14133	-3.23969	hypothetical protein	5e-05
CC1G_09712	449764	2781	136.168	65.0479	-1.06581	hypothetical protein	5e-05
CC1G_09693	472370	3315	111.885	20.1121	-2.47588	group II decarboxylase	5e-05
CC1G_05948	368552	1758	18.3485	7.04702	-1.38058	ankyrin repeat containing protein	5e-05
CC1G_02253	332489	3428	167.387	71.9027	-1.21907	hypothetical protein	5e-05
CC1G_09122	263358	758	22.5289	119.522	2.40742	hypothetical protein	5e-05
CC1G_03724	264092	3549	110.576	37.8845	-1.54536	protein-tyrosine-phosphatase	5e-05
CC1G_02530	498153	1373	191.154	78.4127	-1.28557	hypothetical protein	5e-05
CC1G_02544	449931	1775	27.4952	65.553	1.25348	sodium-hydrogen antiporter	5e-05
CC1G_02543	449945	870	4.57227	16.7245	1.87098	hypothetical protein	5e-05
CC1G_03761	498201	1359	213.017	93.2414	-1.19193	hypothetical protein	5e-05
CC1G_01666	449925	2489	2.60577	7.28808	1.48383	hypothetical protein	5e-05
CC1G_01764	268542	1695	63.8542	28.6885	-1.15431	triacylglycerol lipase	5e-05
CC1G_13678	357302	7005	64.457	23.7093	-1.44288	dual-domain HisK/Mak2 protein kinase	5e-05
CC1G_01673	357231	816	7.99655	0.671707	-3.57347	hypothetical protein	0.0034
CC1G_01758	357315	1172	467.21	223.429	-1.06426	esterase D	5e-05
CC1G_02831	271493	687	428.678	33.6009	-3.67332	hypothetical protein	5e-05
CC1G_02830	450143	868	700.393	83.1235	-3.07484	hypothetical protein	5e-05
CC1G_13565	450144	1815	48.2267	22.9966	-1.06841	hypothetical protein	5e-05
CC1G_02832	424923	1782	61.5704	19.5735	-1.65334	hypothetical protein	5e-05
CC1G_02813	472704	1950	0.635062	10.4232	4.03675	hypothetical protein	5e-05
CC1G_02805	424891	2118	249.163	569.095	1.19158	hypothetical protein	5e-05
CC1G_07713	498252	1276	13.1536	57.3907	2.12536	flavoprotein NADH-dependent oxidoreductase	5e-05
CC1G_07710	450208	855	20.7216	41.8913	1.01551	hypothetical protein	5e-05
CC1G_07690	273741	4833	4.63005	9.75027	1.07441	ATP-dependent bile acid transporter	5e-05
CC1G_07722	479144	1170	87.2039	215.462	1.30497	NADP[H]-dependent ketose reductase	5e-05
CC1G_07718	369180	1769	257.085	78.8685	-1.70473	mannitol-1-phosphate dehydrogenase	0.00025
CC1G_07696	273601	585	181.891	40.0816	-2.18206	HHE domain-containing protein	5e-05
CC1G_07691	472767	1581	569.952	81.0204	-2.81448	NADPH dehydrogenase	5e-05
CC1G_07689	274427	1329	409.949	204.455	-1.00366	dihydrolipoamide succinyltransferase	5e-05
CC1G_05328	369183	513	3.82701	19.5533	2.35312	hypothetical protein	0.0004
CC1G_05342	488321	1897	13.6991	6.28256	-1.12466	PKL/CAK/Fmp29-like protein kinase subdomain-containing protein	5e-05
CC1G_05361	450256	924	29.9985	82.1039	1.45256	hypothetical protein	5e-05
CC1G_05362	369263	751	47.19	130.454	1.46699	hypothetical protein	5e-05
CC1G_05363	450291	1929	72.9519	187.647	1.36301	hypothetical protein	5e-05
CC1G_05349	369248	731	1345.86	625.839	-1.10467	hypothetical protein	5e-05
CC1G_05367	274808	1017	1.00562	3.61992	1.84788	hypothetical protein	0.00445
CC1G_11613	479175	1134	153.819	73.0204	-1.07487	hypothetical protein	5e-05
CC1G_15703	498332	1773	3.14155	1.51577	-1.05142	hypothetical protein	0.00265
CC1G_15706	498328	737	29.4561	126.204	2.09912	hypothetical protein	5e-05
CC1G_11612	450309	654	109.078	49.2642	-1.14675	glutathione S-transferase	5e-05
CC1G_05318	472822	477	6.00002	12.6039	1.07083	hypothetical protein	0.007
CC1G_09092	472843	1119	48.4153	134.213	1.47099	nucleoside-diphosphate-sugar epimerase	5e-05
CC1G_09093	488379	906	50.0145	218.327	2.12607	ergot alkaloid biosynthetic protein A	5e-05
CC1G_10736	369380	1277	12.6873	30.9093	1.28466	hypothetical protein	5e-05
CC1G_10751	479228	1449	1.63464	5.15548	1.65714	cytochrome P50	5e-05
CC1G_09094	369437	1155	37.8912	149.122	1.97656	arylalcohol dehydrogenase	5e-05
CC1G_12395	369425	946	60.1829	134.432	1.15945	hypothetical protein	5e-05
CC1G_12396	276202	526	9.90695	1.91881	-2.36823	hypothetical protein	0.0022
CC1G_10747	450362	1503	18.0008	42.1287	1.22674	cytochrome P450	5e-05
CC1G_10748	369363	843	7.49304	16.5719	1.14512	hypothetical protein	5e-05
CC1G_05523	369424	1458	119.502	41.9047	-1.51185	hypothetical protein	5e-05
CC1G_05520	498427	1743	2.50284	7.17931	1.52028	FAD binding domain-containing protein	5e-05
CC1G_10698	369533	894	26.4539	54.5533	1.04419	hypothetical protein	5e-05
CC1G_10081	369604	1161	136.005	377.713	1.47364	hypothetical protein	5e-05
CC1G_10083	399253	2370	32.1992	9.8063	-1.71525	hypothetical protein	5e-05
CC1G_10075	369576	2325	2.28472	11.7366	2.36093	hypothetical protein	5e-05
CC1G_10077	369594	2364	5.17477	88.3349	4.09342	hypothetical protein	5e-05
CC1G_08511	369589	2793	152.998	28.6089	-2.41898	hypothetical protein	5e-05
CC1G_08509	498467	1308	3.08952	8.67191	1.48897	hypothetical protein	5e-05
CC1G_08612	498468	1930	6.54319	22.5151	1.78283	hypothetical protein	5e-05
CC1G_08609	278642	3531	67.6912	27.0248	-1.32468	photoreceptor A	5e-05
CC1G_10705	369621	1254	139.31	59.1271	-1.23641	hypothetical protein	5e-05
CC1G_07487	472999	2781	349.685	87.5363	-1.9981	trehalose-6-phosphate phosphatase	5e-05
CC1G_07486	473004	1026	113.617	317.475	1.48247	farnesyltransferase/geranylgeranyltransferase type I alpha subunit	5e-05
CC1G_04928	473005	1963	105.398	238.594	1.1787	leucine aminopeptidase 1	5e-05
CC1G_14045	488526	1160	2.55635	0.986384	-1.37386	hypothetical protein	0.00315
CC1G_14040	376843	865	21.3639	84.5547	1.98471	hypothetical protein	5e-05
CC1G_04937	450564	1302	25.1504	52.4743	1.06103	hypothetical protein	5e-05
CC1G_04949	369807	1832	144.899	63.5167	-1.18984	hypothetical protein	5e-05
CC1G_06594	280118	1914	7.82587	16.8964	1.11039	esterase	5e-05
CC1G_06571	493918	1002	99.742	39.1455	-1.34935	elongation factor ts	5e-05
CC1G_06563	357958	1269	2.87516	23.6626	3.04089	exo-beta-1,3-glucanase	5e-05
CC1G_01877	414471	720	18.856	9.04715	-1.05949	riboflavin-specific deaminase	0.0003
CC1G_01876	493976	885	127.282	22.4973	-2.50021	oxidoreductase	5e-05
CC1G_01862	493977	1512	2.5614	6.05681	1.24163	hypothetical protein	5e-05
CC1G_01845	493990	1881	88.2329	28.7868	-1.61591	hypothetical protein	5e-05
CC1G_01824	357802	1638	118.589	50.0284	-1.24516	atypical/ABC1/ABC1-C protein kinase	5e-05
CC1G_06570	357805	1006	10.4133	4.68491	-1.15233	phytoceramidase	0.0007
CC1G_06553	388282	1876	15.6653	102.054	2.70369	DUF89 domain-containing protein	5e-05
CC1G_13709	414494	3129	84.8934	24.0771	-1.81799	hypothetical protein	5e-05
CC1G_01864	493975	1857	9.1521	19.1982	1.06879	hypothetical protein	5e-05
CC1G_01826	461236	591	2874.03	320.424	-3.16502	hypothetical protein	5e-05
CC1G_13703	475036	1120	218.008	57.9747	-1.91088	NA	5e-05
CC1G_08726	283446	1614	2.68137	6.86552	1.3564	beta-glucan synthesis-associated protein KRE6	5e-05
CC1G_11035	425605	2083	72.1993	146.575	1.02158	mitochondrial chaperone BCS1	5e-05
CC1G_08741	285312	1803	56.2682	19.477	-1.53055	high nitrogen upregulated cytochrome P450 monooxygenase 2	5e-05
CC1G_08735	473191	568	1210.91	355.039	-1.77005	hypothetical protein	5e-05
CC1G_08724	425585	2859	708.541	277.21	-1.35387	extracellular beta-glucosidase	5e-05
CC1G_01544	369876	1794	2.99958	12.1013	2.01233	pyranose dehydrogenase	5e-05
CC1G_01525	488574	1564	16.6696	39.4506	1.24283	TAL1	0.00055
CC1G_01543	542970	1539	13.1981	87.8329	2.73443	LAP1	5e-05
CC1G_05003	473230	453	2.81475	145.646	5.69331	galectin-1	0.0001
CC1G_05005	473274	629	11.9528	662.098	5.79163	galectin-2	5e-05
CC1G_04986	488611	1002	27.8286	11.1803	-1.31561	DUF636 domain-containing protein	5e-05
CC1G_05012	479441	807	17.3414	7.87621	-1.13865	hypothetical protein	0.00025
CC1G_03688	370048	1602	56.1915	27.7508	-1.01782	amino acid transporter	5e-05
CC1G_03384	356789	1233	38.4386	81.0448	1.07617	hypothetical protein	5e-05
CC1G_03399	473349	1074	20.6858	9.19637	-1.1695	hypothetical protein	5e-05
CC1G_03377	535133	1916	88.4522	27.1865	-1.70201	protoporphyrinogen oxidase	5e-05
CC1G_03366	148252	3384	14.9551	31.7862	1.08777	hypothetical protein	5e-05
CC1G_03381	541055	1844	1.72982	5.27921	1.6097	hypothetical protein	5e-05
CC1G_14294	399846	1000	5.83812	2.56547	-1.18628	hypothetical protein	0.0002
CC1G_09836	223672	2003	12.3242	6.02113	-1.03339	general amidase	5e-05
CC1G_05998	535164	1798	2.14721	15.0368	2.80796	laccase 5	5e-05
CC1G_14074	488706	579	21.6507	6.91304	-1.64702	hypothetical protein	5e-05
CC1G_06012	535237	630	16.3102	6.88732	-1.24376	hypothetical protein	0.00115
CC1G_05984	426049	935	9.72933	3.84476	-1.33945	hypothetical protein	0.0002
CC1G_10925	535277	690	48.477	23.4043	-1.05053	thioredoxin Trp26 family protein	5e-05
CC1G_10951	461529	2491	30.7846	68.9908	1.16419	hypothetical protein	5e-05
CC1G_10939	291832	1675	410.775	12.3106	-5.06038	acetate kinase	5e-05
CC1G_00787	543155	940	160.505	80.1709	-1.00146	hypothetical protein	5e-05
CC1G_09529	292047	777	78.439	441.584	2.49304	hypothetical protein	5e-05
CC1G_09530	426342	1481	57.2363	179.23	1.64681	hypothetical protein	5e-05
CC1G_09536	479688	711	78.6816	31.1067	-1.3388	hypothetical protein	5e-05
CC1G_04324	479694	669	237.656	114.511	-1.05339	hypothetical protein	5e-05
CC1G_09875	354355	5598	32.8121	15.8352	-1.0511	AMP-dependent synthetase and ligase	0.0012
CC1G_11634	396509	575	43.6726	19.7938	-1.14168	hypothetical protein	5e-05
CC1G_11450	438182	500	73.9152	12.4901	-2.56508	hypothetical protein	5e-05
CC1G_04475	438890	1806	2.00158	4.53192	1.17898	hypothetical protein	0.00025
CC1G_00836	402681	345	585.009	189.526	-1.62606	hypothetical protein	5e-05
CC1G_01163	373963	1153	169.816	76.3648	-1.15299	siroheme biosynthesis protein MET8	5e-05
CC1G_00737	441813	534	84.2601	213.533	1.34154	hypothetical protein	5e-05
CC1G_07230	441812	3111	12.9154	36.1789	1.48606	nitrate reductase	5e-05
CC1G_00675	432086	740	176.283	55.2299	-1.67437	hypothetical protein	0.00015
CC1G_15201	432230	509	156.726	71.063	-1.14107	hypothetical protein	5e-05
CC1G_03121	418288	3311	59.3447	29.3252	-1.01698	beta-mannosidase	5e-05
CC1G_15153	378803	1521	6.32276	2.50185	-1.33756	hypothetical protein	5e-05
CC1G_11558	434216	1216	85.1664	273.158	1.68138	hypothetical protein	5e-05
CC1G_07629	152439	216	4.47518	21.2786	2.24939	hypothetical protein	5e-05
CC1G_06942	363643	916	1539.48	253.065	-2.60486	hypothetical protein	5e-05
CC1G_14709	186809	3259	105.314	50.9812	-1.04667	hypothetical protein	5e-05
CC1G_10647	198808	1305	468.696	202.532	-1.2105	hypothetical protein	5e-05
CC1G_02104	446662	1390	494.128	157.448	-1.65001	peroxidase	5e-05
CC1G_15054	446928	1814	61.8404	26.3536	-1.23055	hypothetical protein	5e-05
CC1G_05908	209971	2254	506.778	47.4174	-3.41786	catalase	5e-05
CC1G_11176	413147	1117	3.9935	13.2731	1.73278	hypothetical protein	5e-05
CC1G_10862	448083	2648	19.2575	53.3316	1.46957	peptide transporter MTD1	5e-05
CC1G_12689	225784	1291	149.54	49.3936	-1.59813	hypothetical protein	5e-05
CC1G_07347	448129	1541	2158	452.01	-2.25526	DNA primase catalytic subunit	5e-05
CC1G_13755	448596	471	96.957	6.35014	-3.93249	hypothetical protein	5e-05
CC1G_00518	367417	1296	15.4066	35.3077	1.19643	hypothetical protein	5e-05
CC1G_09103	254167	2186	965.365	297.349	-1.69892	hypothetical protein	5e-05
CC1G_07716	449869	2299	3.51862	7.85346	1.15832	hypothetical protein	0.0002
CC1G_07703	450203	2042	3658.29	1682.36	-1.12069	aldehyde dehydrogenase	5e-05
CC1G_04948	450218	1987	35.7405	125.902	1.81666	LAP1	5e-05
CC1G_03371	450594	980	18.1986	8.4825	-1.10127	hypothetical protein	0.0006
CC1G_10940	450935	3039	468.869	34.2436	-3.77528	phosphoketolase	5e-05
CC1G_04265	467674	1344	152.397	61.9788	-1.29798	alpha-1,2-mannosyltransferase	5e-05
CC1G_11923	436904	2590	237.656	114.511	-1.05339	tRNA [cytosine-5-]-methyltransferase NSUN2	5e-05
CC1G_09874	385153	964	32.8121	15.8352	-1.0511	hypothetical protein	0.0012
CC1G_06411	14270	1467	43.6726	19.7938	-1.14168	hypothetical protein	5e-05
CC1G_10405	438184	1585	42.7933	19.8738	-1.10651	hypothetical protein	5e-05
CC1G_11449	507812	680	73.9152	12.4901	-2.56508	hypothetical protein	5e-05
CC1G_14126	438891	1932	2.00158	4.53192	1.17898	hypothetical protein	0.00025
CC1G_10558	480663	610	3.00656	20.9665	2.8019	hypothetical protein	5e-05
CC1G_01162	439037	1549	169.816	76.3648	-1.15299	hypothetical protein	5e-05
CC1G_00737	82352	1122	84.2601	213.533	1.34154	hypothetical protein	5e-05
CC1G_00676	441812	225	176.283	55.2299	-1.67437	hypothetical protein	0.00015
CC1G_03516	501439	4355	156.726	71.063	-1.14107	transmembrane protein	5e-05
CC1G_05477	442967	1197	68.506	4.25437	-4.00921	integral membrane protein	5e-05
CC1G_03120	467054	1017	59.3447	29.3252	-1.01698	hypothetical protein	5e-05
CC1G_09392	379191	1799	6.32276	2.50185	-1.33756	hypothetical protein	5e-05
CC1G_11559	373850	1980	85.1664	273.158	1.68138	hypothetical protein	5e-05
CC1G_07630	520278	880	4.47518	21.2786	2.24939	hypothetical protein	5e-05
CC1G_08281	445492	1441	72.8449	31.1834	-1.22405	hypothetical protein	5e-05
CC1G_06955	523533	435	45.6244	22.8056	-1.00042	inositol metabolism protein Opi10	0.0004
CC1G_06943	364133	1560	1539.48	253.065	-2.60486	hypothetical protein	5e-05
CC1G_06948	364142	1035	54.2093	189.587	1.80625	hypothetical protein	5e-05
CC1G_14710	364145	1090	105.314	50.9812	-1.04667	methionyl aminopeptidase	5e-05
CC1G_10646	525239	1647	468.696	202.532	-1.2105	delta-1-pyrroline-5-carboxylate dehydrogenase	5e-05
CC1G_02105	496509	1417	494.128	157.448	-1.65001	hypothetical protein	5e-05
CC1G_15054	209946	902	61.8404	26.3536	-1.23055	hypothetical protein	5e-05
CC1G_05907	209971	1370	506.778	47.4174	-3.41786	hypothetical protein	5e-05
CC1G_11175	527413	1539	3.9935	13.2731	1.73278	hypothetical protein	5e-05
CC1G_12689	225412	3433	149.54	49.3936	-1.59813	hypothetical protein	5e-05
CC1G_06664	448129	1054	4.25816	12.0298	1.49832	hypothetical protein	0.0001
CC1G_07346	448254	1170	2158	452.01	-2.25526	hypothetical protein	5e-05
CC1G_13754	529552	643	96.957	6.35014	-3.93249	hemerythrin HHE cation binding domain-containing protein	5e-05
CC1G_00519	448945	696	15.4066	35.3077	1.19643	acetyltransferase	5e-05
CC1G_13638	413866	1617	98.2565	38.8291	-1.33941	hypothetical protein	5e-05
CC1G_09102	460405	2369	965.365	297.349	-1.69892	hypothetical protein	5e-05
CC1G_07717	479000	1905	3.51862	7.85346	1.15832	sphingomyelin phosphodiesterase	0.0002
CC1G_07702	498265	609	3658.29	1682.36	-1.12069	hypothetical protein	5e-05
CC1G_04947	450219	5292	35.7405	125.902	1.81666	hypothetical protein	5e-05
CC1G_14964	461167	690	18.1986	8.4825	-1.10127	hypothetical protein	0.0006
CC1G_14077	498691	195	17.1017	6.04991	-1.49916	hypothetical protein	0.0089
CC1G_10941	370378	1521	468.869	34.2436	-3.77528	hypothetical protein	5e-05
CC1G_04674	498805	3086	367.667	170.462	-1.10895	hypothetical protein	5e-05
CC1G_13948	543519	2697	683.201	63.0496	-3.43775	hypothetical protein	5e-05
CC1G_02049	515919	1116	78.8401	36.0578	-1.12862	hypothetical protein	5e-05
CC1G_07824	493567	1146	177.325	66.6581	-1.41154	hypothetical protein	5e-05
CC1G_15370	465187	1054	23.6578	11.2351	-1.07431	hypothetical protein	0.00105
