# Supplementary material for: Transcriptome Analysis Reveals Mycelial and Fruiting Responses to Lithium Chloride in Coprinopsis cinerea
Source: J Fungi (Basel). 2024 Feb 9;10(2):140. doi: 10.3390/jof10020140 (PMC10890143; doi:10.3390/jof10020140)
Supplement: Supplementary file 1 [file jof-10-00140-s001.zip › Dataset S2.xlsx]

## Sheet: DEGs_in_HHKvsLM2
OK7_ID	JGI Protein ID	Length	HHK FPKM	LM2 FPKM	Log2 fold change	Okayama broad description	p_value
CC1G_12242	436751	743	5.00309	0.526221	-3.24908	hypothetical protein	0.00355
CC1G_07941	358	1137	737.116	1688.15	1.19548	hypothetical protein	5e-05
CC1G_04240	473658	1223	229.092	108.893	-1.07302	hypothetical protein	5e-05
CC1G_04312	411302	648	11.1861	45.1953	2.01446	hypothetical protein	5e-05
CC1G_04321	436970	1488	35.9439	12.2739	-1.55015	hypothetical protein	5e-05
CC1G_07949	492516	1755	7.07066	0.692275	-3.35243	hypothetical protein	5e-05
CC1G_15780	473590	667	67.2876	153.869	1.19329	hypothetical protein	5e-05
CC1G_04239	537412	1632	18.3576	6.62953	-1.4694	hypothetical protein	5e-05
CC1G_11942	354027	1488	19.7298	8.04688	-1.29387	DNA primase large subunit Spp2	5e-05
CC1G_01098	494086	939	62.8293	178.228	1.50422	arginase	5e-05
CC1G_01112	461862	1743	10.9477	28.5924	1.385	tryptophan 2,3-dioxygenase	5e-05
CC1G_01089	461884	1290	4.81502	1.74969	-1.46044	AGC/PKA protein kinase	0.00025
CC1G_01042	9990	1626	1.49187	3.37124	1.17616	hypothetical protein	0.0004
CC1G_01009	494170	717	111.71	36.2373	-1.62421	hypothetical protein	5e-05
CC1G_02285	461982	2580	1.3754	4.42651	1.68632	peptidase	5e-05
CC1G_07093	488837	744	202.609	818.048	2.01348	eukaryotic translation initiation factor 6	5e-05
CC1G_07086	462026	1101	18.9831	51.2774	1.43361	hypothetical protein	5e-05
CC1G_07094	462018	1374	10.8436	23.5858	1.12108	hypothetical protein	5e-05
CC1G_06092	437234	1668	8.57015	20.9567	1.29002	hypothetical protein	5e-05
CC1G_06086	370922	408	206.2	19.6604	-3.39068	hypothetical protein	5e-05
CC1G_06095	462051	453	18.7755	110.236	2.55366	hypothetical protein	5e-05
CC1G_06091	498952	666	16.5556	7.93117	-1.06172	hypothetical protein	0.0026
CC1G_06083	479770	1081	15.8445	1.62659	-3.28405	hypothetical protein	5e-05
CC1G_06081	543298	1673	1337.11	406.014	-1.71952	hypothetical protein	5e-05
CC1G_06080	498964	402	39.5958	15.0769	-1.393	hypothetical protein	0.0206
CC1G_01573	451526	1596	23.65	132.961	2.49109	hypothetical protein	5e-05
CC1G_01577	400480	1410	3.07864	1.2273	-1.32681	glycosyl hydrolase family 62 protein	0.0027
CC1G_01578	498983	1038	15.0996	31.5536	1.06329	glycosyl hydrolase family 62 protein	5e-05
CC1G_01580	437282	642	35.4893	331.578	3.22389	hypothetical protein	5e-05
CC1G_01566	370976	2118	23.1894	5.969	-1.95791	fatty acid activator Faa4	5e-05
CC1G_01585	370979	1503	16.7947	64.3441	1.9378	hypothetical protein	5e-05
CC1G_03612	499030	1488	49.6419	110.957	1.16037	hypothetical protein	5e-05
CC1G_03608	14629	1281	28.316	10.9249	-1.374	hypothetical protein	5e-05
CC1G_03603	371091	3276	8.52677	2.41256	-1.82143	hypothetical protein	5e-05
CC1G_03600	371073	489	122.162	43.4853	-1.49019	hypothetical protein	5e-05
CC1G_05857	371178	1392	1.76241	3.6082	1.03373	Cip2	0.0051
CC1G_05869	462172	2181	6.01072	1.99946	-1.58793	hypothetical protein	5e-05
CC1G_15390	371185	2955	204.697	54.9987	-1.89602	cytochrome P450	5e-05
CC1G_05847	437384	1980	2.05215	0.692974	-1.56626	hypothetical protein	0.0027
CC1G_14556	451649	723	12.274	4.11985	-1.57495	hypothetical protein	0.0027
CC1G_09963	371359	2028	0.803909	2.98165	1.89101	cyclin	0.00025
CC1G_09961	17387	1034	54.4502	191.169	1.81184	C-8 sterol isomerase	5e-05
CC1G_10592	499145	1161	71.2782	169.411	1.249	serine protease	5e-05
CC1G_10595	437509	1886	14.8642	4.02021	-1.8865	hypothetical protein	5e-05
CC1G_10599	489010	992	53.9404	23.5658	-1.19467	hypothetical protein	5e-05
CC1G_10602	371440	1596	17.7517	55.7079	1.64993	hypothetical protein	5e-05
CC1G_10615	18280	1487	12.0451	5.65221	-1.09156	serine protease	5e-05
CC1G_10617	437538	1056	29.3482	7.09791	-2.0478	hypothetical protein	5e-05
CC1G_15647	371377	2631	11.2407	30.2213	1.42683	hypothetical protein	5e-05
CC1G_10622	479963	835	28.5763	4.13883	-2.78753	hypothetical protein	5e-05
CC1G_10590	371421	756	2.52625	13.9535	2.46556	hypothetical protein	0.00025
CC1G_15840	400893	597	177.623	753.248	2.08431	NA	5e-05
CC1G_10616	437537	1508	43.2096	14.4447	-1.58081	hypothetical protein	5e-05
CC1G_10620	18408	1302	42.9289	109.011	1.34446	hypothetical protein	5e-05
CC1G_08152	462284	1731	175.989	86.0304	-1.03257	hypothetical protein	5e-05
CC1G_14702	475201	1082	10.2446	62.495	2.60888	oxidoreductase	5e-05
CC1G_01396	415219	1755	15.2773	36.4196	1.25332	hypothetical protein	5e-05
CC1G_08151	462285	993	33.2848	128.987	1.95429	DUF636 domain-containing protein	5e-05
CC1G_08136	462299	3606	18.1518	4.27281	-2.08686	hypothetical protein	5e-05
CC1G_01435	358430	1806	5.99939	17.5762	1.55073	tripeptidyl peptidase A	0.00175
CC1G_01430	358370	720	1.10399	5.83719	2.40254	hypothetical protein	0.00295
CC1G_01393	494270	999	48.8907	9.38396	-2.38129	hypothetical protein	5e-05
CC1G_04652	499183	660	35.2265	112.981	1.68135	hypothetical protein	5e-05
CC1G_11135	371592	1503	3.14653	1.38392	-1.185	hypothetical protein	0.00175
CC1G_12349	427210	2032	11.146	5.46957	-1.02703	hypothetical protein	5e-05
CC1G_11189	427199	1400	24.9417	7.86715	-1.66464	hypothetical protein	5e-05
CC1G_12352	371669	2178	4.29001	1.06574	-2.00912	hypothetical protein	5e-05
CC1G_04866	371700	1248	8.92602	18.4013	1.04372	hypothetical protein	5e-05
CC1G_04875	437809	793	8.00278	2.681	-1.57773	hypothetical protein	0.00795
CC1G_04878	371696	582	20.8444	46.0991	1.14508	hypothetical protein	5e-05
CC1G_04869	437803	1361	3.28189	13.1693	2.00459	hypothetical protein	5e-05
CC1G_04872	499276	642	40.7207	14.1486	-1.52511	hypothetical protein	5e-05
CC1G_04877	543592	1046	30.2211	4.47854	-2.75446	hypothetical protein	5e-05
CC1G_04880	24314	999	1.93523	4.21205	1.12202	hypothetical protein	0.01505
CC1G_04883	371744	576	14.2603	51.12	1.84188	hypothetical protein	5e-05
CC1G_04884	371733	561	14.1891	33.5292	1.24064	hypothetical protein	5e-05
CC1G_04892	371743	1719	2.84433	6.82899	1.26358	FAD binding domain-containing protein	5e-05
CC1G_04893	437827	421	702.64	259.767	-1.43557	hypothetical protein	5e-05
CC1G_07894	371811	1206	28.7716	70.1076	1.28492	hypothetical protein	5e-05
CC1G_07902	437832	918	26.4616	189.121	2.83734	hypothetical protein	5e-05
CC1G_07900	437834	960	52.1703	176.097	1.75507	hypothetical protein	5e-05
CC1G_07897	24490	1859	2.35128	0.866195	-1.44068	cytochrome P450 11B1	0.0005
CC1G_00035	451918	2940	22.2083	9.51583	-1.22269	kinesin motor protein	5e-05
CC1G_12224	371895	975	5.75667	2.58328	-1.15603	hypothetical protein	0.0094
CC1G_12219	401354	941	97.1389	409.698	2.07644	hypothetical protein	5e-05
CC1G_12221	451934	1065	6.99855	18.2576	1.38337	hypothetical protein	5e-05
CC1G_15062	437893	2062	23.3787	2.37611	-3.29852	hypothetical protein	0.0023
CC1G_07238	437911	911	8.68551	1.33258	-2.70439	hypothetical protein	0.00025
CC1G_07245	507195	1431	8.11855	2.74759	-1.56306	hypothetical protein	5e-05
CC1G_07239	543677	2239	9.13517	2.66641	-1.77653	hypothetical protein	5e-05
CC1G_11010	371925	1659	2.13167	0.860073	-1.30946	hypothetical protein	0.002
CC1G_01500	437942	1317	0.909029	34.7368	5.25599	hypothetical protein	5e-05
CC1G_13808	480189	2069	16.46	43.5643	1.40418	hypothetical protein	5e-05
CC1G_11426	437970	1368	12.3347	4.55301	-1.43783	hypothetical protein	5e-05
CC1G_08823	452002	1707	8.16804	16.9651	1.05451	hypothetical protein	5e-05
CC1G_08820	27198	845	1045.2	501.042	-1.06078	hypothetical protein	5e-05
CC1G_08822	452003	975	166.239	22.2662	-2.90033	hypothetical protein	5e-05
CC1G_08817	372085	909	9.3415	61.2576	2.71316	hypothetical protein	5e-05
CC1G_08816	499429	963	41.9628	148.654	1.82478	hypothetical protein	5e-05
CC1G_09573	499440	1998	24.5667	12.1316	-1.01794	high-affinity methionine permease	5e-05
CC1G_09566	372095	606	6.40273	41.988	2.71322	hypothetical protein	5e-05
CC1G_09569	438000	1032	106.55	50.3489	-1.0815	hypothetical protein	5e-05
CC1G_09580	27642	1940	3.95998	0.372769	-3.40914	hypothetical protein	0.00045
CC1G_09584	372143	603	8.30425	16.6782	1.00604	hypothetical protein	0.00565
CC1G_09588	427679	852	74.845	23.7996	-1.65297	hypothetical protein	5e-05
CC1G_07078	538972	4142	17.8267	8.28761	-1.10501	other/BUB protein kinase	0.00405
CC1G_12572	494314	1002	67.7008	237.622	1.81143	fatty acid hydroxylase	5e-05
CC1G_06441	30510	1485	8.84704	2.82044	-1.64927	hypothetical protein	5e-05
CC1G_06438	485202	1546	266.25	541.889	1.02522	homocitrate synthase	5e-05
CC1G_06430	438148	1148	16.9423	41.6969	1.29931	glycosyl-hydrolase	5e-05
CC1G_07067	438053	2164	16.2089	35.8748	1.14618	hypothetical protein	5e-05
CC1G_12420	452078	1926	123.636	39.8104	-1.63488	hypothetical protein	5e-05
CC1G_13448	462752	1383	2.77899	9.98789	1.84562	cellobiohydrolase I-II	5e-05
CC1G_14423	438121	572	6.91777	15.677	1.18027	hypothetical protein	0.01655
CC1G_06413	475384	1642	48.104	23.7438	-1.01861	hypothetical protein	5e-05
CC1G_10391	499464	1296	4.39409	0.212805	-4.36796	hypothetical protein	0.0091
CC1G_10397	31906	1105	22.8864	2.63862	-3.11664	hypothetical protein	5e-05
CC1G_10409	32225	2045	11.2709	448.251	5.31363	oxidoreductase A;oxidoreductase/cytochrome P450 monooxygenase	5e-05
CC1G_12161	401602	1554	3.60266	10.1474	1.49397	cytochrome P450	5e-05
CC1G_10384	372220	1422	22.0427	187.02	3.08482	O-methylsterigmatocystin oxidoreductase	5e-05
CC1G_08199	462854	990	143.322	321.329	1.16479	hypothetical protein	5e-05
CC1G_08198	32766	1532	10.3209	85.695	3.05365	hypothetical protein	5e-05
CC1G_08204	462849	717	32.0084	67.7681	1.08216	hypothetical protein	5e-05
CC1G_08197	401726	1475	15.7383	38.5356	1.29191	hypothetical protein	5e-05
CC1G_09439	33597	1363	14.4495	105.032	2.86175	hypothetical protein	5e-05
CC1G_15277	499548	1140	5.26957	12.9111	1.29286	hypothetical protein	5e-05
CC1G_11020	543822	511	131.753	338.473	1.36121	hypothetical protein	5e-05
CC1G_11016	445355	762	20.5403	225.509	3.45665	hypothetical protein	5e-05
CC1G_09438	372344	711	0.56502	2.70603	2.2598	hypothetical protein	0.0176
CC1G_15736	372414	3075	28.5461	60.7687	1.09004	NAD-dependent epimerase/dehydratase	5e-05
CC1G_05469	489330	1238	7.21307	3.44829	-1.06473	hypothetical protein	0.0001
CC1G_05456	480323	837	1.32779	5.92032	2.15665	hypothetical protein	0.00785
CC1G_05457	372406	1932	1.06025	19.0981	4.17095	hypothetical protein	5e-05
CC1G_05464	372404	999	6.10604	2.11139	-1.53204	hypothetical protein	0.00345
CC1G_02311	508076	627	210.782	5.42265	-5.28061	hypothetical protein	5e-05
CC1G_02299	438368	1629	89.0157	232.522	1.38524	diphosphomevalonate decarboxylase	5e-05
CC1G_04386	438392	700	161.084	35.5815	-2.17861	hypothetical protein	5e-05
CC1G_04379	543897	2336	14.9073	6.22809	-1.25916	hypothetical protein	0.00255
CC1G_04390	372502	1026	220.66	475.324	1.10709	hypothetical protein	5e-05
CC1G_04378	428031	720	852.879	277.841	-1.61808	hypothetical protein	5e-05
CC1G_09790	499623	1812	2.79981	6.57987	1.23273	aryl-alcohol oxidase	5e-05
CC1G_09798	401986	612	15.0761	281.067	4.22058	hypothetical protein	5e-05
CC1G_09800	438441	3062	13.4416	4.09294	-1.71549	hypothetical protein	5e-05
CC1G_09806	480399	1902	0.75468	3.39665	2.17017	mitochondrial chaperone BCS1	5e-05
CC1G_09791	428057	3691	10.3037	3.76685	-1.45174	hypothetical protein	5e-05
CC1G_09805	428080	1563	6.05564	2.70895	-1.16055	hypothetical protein	0.0001
CC1G_09811	35967	1106	4.78454	19.341	2.01521	hypothetical protein	5e-05
CC1G_09814	438459	1722	10.9954	114.423	3.37941	elongation factor-2 kinase	5e-05
CC1G_04706	463000	966	11.6415	28.3904	1.28613	hypothetical protein	5e-05
CC1G_07980	428168	765	15.6996	6.43529	-1.28665	hypothetical protein	5e-05
CC1G_04707	428110	778	1.76079	18.6331	3.40357	hypothetical protein	0.00055
CC1G_07985	438486	2302	131.806	457.146	1.79424	hypothetical protein	5e-05
CC1G_15585	543966	1020	3.85869	0.743124	-2.37643	DUF636 domain-containing protein	0.00145
CC1G_11974	489418	618	6.42853	27.8276	2.11395	hypothetical protein	5e-05
CC1G_11982	463032	1032	28.8156	205.603	2.83494	hypothetical protein	5e-05
CC1G_11212	428241	1602	18.5737	7.79171	-1.25325	hypothetical protein	5e-05
CC1G_11718	463061	1089	2.80982	17.9666	2.67677	hypothetical protein	5e-05
CC1G_03854	37640	1823	30.642	104.304	1.76722	hypothetical protein	5e-05
CC1G_11711	402167	1335	85.747	254.175	1.56766	serine/threonine protein kinase	5e-05
CC1G_03243	415641	1279	107.002	281.017	1.39302	hypothetical protein	5e-05
CC1G_03247	539116	474	263.108	88.5796	-1.57061	hypothetical protein	0.00025
CC1G_03279	39881	1012	5.53019	16.9575	1.61652	hypothetical protein	5e-05
CC1G_03280	438676	780	42.7952	92.0768	1.10539	acyl-protein thioesterase 1	5e-05
CC1G_03309	485314	1662	3.96769	1.48355	-1.41925	hypothetical protein	5e-05
CC1G_03314	438723	1282	30.3328	241.82	2.99499	hypothetical protein	5e-05
CC1G_03315	415810	1174	19.5455	205.428	3.39373	hypothetical protein	5e-05
CC1G_03207	415544	1713	90.6719	227.042	1.32423	allantoicase	5e-05
CC1G_03226	452378	1176	562.93	1199.88	1.09186	formate dehydrogenase	5e-05
CC1G_03260	438656	2258	4.06983	1.22041	-1.73761	hypothetical protein	5e-05
CC1G_03282	39973	1364	103.246	5.1122	-4.33599	hypothetical protein	5e-05
CC1G_06884	508801	873	141.69	60.9742	-1.21646	hypothetical protein	5e-05
CC1G_14239	372884	4431	46.5388	19.3967	-1.26263	hypothetical protein	5e-05
CC1G_06885	41230	980	13.1744	5.77659	-1.18945	hypothetical protein	0.0114
CC1G_06891	41081	1178	42.5865	99.0188	1.21731	metalloprotease	0.00125
CC1G_15453	463240	1002	15.3871	38.7095	1.33097	abhydrolase domain-containing protein 12	5e-05
CC1G_15449	42446	564	34.8068	8.58021	-2.02028	hypothetical protein	0.00015
CC1G_07317	480537	1971	223.811	51.6024	-2.11677	sodium:inorganic phosphate symporter	5e-05
CC1G_11897	42776	1302	10.1806	29.5471	1.5372	chitin deacetylase	5e-05
CC1G_11894	428431	1576	53.4202	193.741	1.85867	hypothetical protein	5e-05
CC1G_11888	372988	1035	3.11653	30.4948	3.29055	hypothetical protein	5e-05
CC1G_11887	43093	1311	50.817	145.897	1.52156	hypothetical protein	5e-05
CC1G_03982	402412	866	104.295	393.513	1.91574	hypothetical protein	5e-05
CC1G_03981	428490	1454	256.925	127.248	-1.0137	hypothetical protein	5e-05
CC1G_03975	438844	2672	11.828	2.01065	-2.55647	hypothetical protein	5e-05
CC1G_03991	463268	1119	24.6303	59.0745	1.2621	hypothetical protein	5e-05
CC1G_11460	438877	480	989.418	461.467	-1.10035	hypothetical protein	5e-05
CC1G_11455	463307	1569	24.1304	49.9177	1.0487	cytochrome P450	5e-05
CC1G_11440	373147	375	82.9191	185.483	1.16151	hypothetical protein	0.00015
CC1G_08773	44621	1335	69.1985	144.811	1.06536	hypothetical protein	5e-05
CC1G_13023	438934	1741	26.5329	5.62331	-2.23829	hypothetical protein	5e-05
CC1G_10825	373206	1143	15.5892	6.40465	-1.28336	replication factor C	5e-05
CC1G_10844	499867	546	19.7323	9.04952	-1.12465	hypothetical protein	0.00965
CC1G_10834	463358	474	649.143	321.119	-1.01543	hypothetical protein	5e-05
CC1G_10826	402634	2819	27.4974	12.1626	-1.17684	CoCAF-1	5e-05
CC1G_04464	428727	1044	13.0854	5.34439	-1.29186	hypothetical protein	5e-05
CC1G_04479	373301	843	8.17413	19.0955	1.2241	basic transcription factor 2.35KD subunit	5e-05
CC1G_04469	438997	1510	26.7994	378.482	3.81995	hypothetical protein	5e-05
CC1G_10568	499916	819	42.2123	21.0297	-1.00523	hypothetical protein	5e-05
CC1G_10565	544192	1551	154.162	65.6038	-1.23259	hypothetical protein	5e-05
CC1G_10564	499922	1413	13.7579	6.7264	-1.03235	hypothetical protein	5e-05
CC1G_10556	46726	1888	14.4144	32.8535	1.18854	hypothetical protein	5e-05
CC1G_09158	47183	492	57.5934	8.02675	-2.84301	hypothetical protein	0.001
CC1G_09156	402776	1260	2.12261	0.52216	-2.02328	hypothetical protein	0.0032
CC1G_09154	439071	857	100.973	298.765	1.56504	snodprot1	5e-05
CC1G_09151	373406	3117	5.2895	12.7457	1.26881	Na+/K+ ATPase alpha subunit isoform 3	5e-05
CC1G_09149	428867	1381	540.539	133.289	-2.01985	hypothetical protein	5e-05
CC1G_13989	373426	747	8.27307	2.09759	-1.97969	hypothetical protein	0.0049
CC1G_04530	463517	1197	2.59138	11.2889	2.12311	epoxide hydrolase domain-containing protein	5e-05
CC1G_04503	439189	2839	12.4094	4.679	-1.40716	replication control protein 1	5e-05
CC1G_09311	389672	1321	1.69524	8.82122	2.37949	hypothetical protein	5e-05
CC1G_04545	452701	2760	18.9634	8.81892	-1.10455	hypothetical protein	5e-05
CC1G_04539	359386	939	16.1532	4.06461	-1.99063	hypothetical protein	5e-05
CC1G_04513	359262	2208	238.473	666.769	1.48336	hypothetical protein	5e-05
CC1G_04512	49522	1698	15.3751	6.69848	-1.1987	hypothetical protein	5e-05
CC1G_04496	359180	3081	10.2568	2.85279	-1.84613	chitin synthase	5e-05
CC1G_02684	499958	1236	4.87216	26.1872	2.42623	hypothetical protein	5e-05
CC1G_02706	428944	1115	0.468626	5.18256	3.46716	short-chain dehydrogenase	0.0004
CC1G_02688	544231	1235	42.7599	100.22	1.22884	hypothetical protein	5e-05
CC1G_02692	439222	1204	8.0268	2.88853	-1.47449	hypothetical protein	5e-05
CC1G_09974	402905	1702	1.73727	0.677234	-1.3591	protein kinase subdomain-containing protein PKL/ccin4	0.00315
CC1G_11916	428994	1044	12.3548	5.45958	-1.17821	protein kinase subdomain-containing protein PKL/ccin3	5e-05
CC1G_11917	480765	898	24.9658	3.08943	-3.01454	hypothetical protein	5e-05
CC1G_11914	439276	1974	2.46895	0.950981	-1.37641	protein kinase subdomain-containing protein PKL/ccin4	0.00045
CC1G_11911	439278	711	33.5403	15.7345	-1.09196	hypothetical protein	5e-05
CC1G_09617	51416	1412	53.1741	171.722	1.69128	hypothetical protein	5e-05
CC1G_15638	463623	1197	1.42395	13.8941	3.2865	hypothetical protein	5e-05
CC1G_12031	429038	797	6.8098	1.41967	-2.26206	hypothetical protein	0.00125
CC1G_13264	51690	905	4.32621	14.0598	1.70041	hypothetical protein	5e-05
CC1G_13242	402985	1420	2.27485	0.746949	-1.60669	hypothetical protein	0.01355
CC1G_07738	373659	522	174.461	54.1686	-1.68737	hypothetical protein	5e-05
CC1G_07736	439328	2009	15.8701	6.07478	-1.38541	RAD52 DNA repair protein RADC	5e-05
CC1G_07728	373683	1050	135.846	353.784	1.3809	delta-sterol C-methyltransferase	5e-05
CC1G_08015	52671	2015	40.2059	100.384	1.32005	hypothetical protein	5e-05
CC1G_07496	53677	1624	46.4507	93.3969	1.00767	hypothetical protein	5e-05
CC1G_07495	500084	513	6.18914	38.2303	2.62691	hypothetical protein	0.00065
CC1G_07437	403152	2562	16.2063	5.47518	-1.56558	other/PLK protein kinase	5e-05
CC1G_07537	480871	1538	4.82265	10.351	1.10188	hypothetical protein	5e-05
CC1G_15600	429272	927	87.9679	1431.62	4.02453	NADP-dependent mannitol dehydrogenase	5e-05
CC1G_07544	489780	2108	193.234	76.458	-1.33761	DUF89 domain-containing protein	5e-05
CC1G_15601	463751	1611	22.2248	10.4982	-1.08203	hypothetical protein	5e-05
CC1G_00842	500128	1971	23.9454	121.045	2.33772	mitochondrial chaperone bcs1	5e-05
CC1G_00820	373942	1983	3.74673	131.677	5.13523	mitochondrial chaperone bcs1	5e-05
CC1G_00147	390027	1383	25.4111	87.2412	1.77955	phosphatase	0.0004
CC1G_00143	485436	1030	4.25039	9.05177	1.09061	hypothetical protein	0.0003
CC1G_00128	439609	1447	4.79754	0.816096	-2.55548	metalloprotease	0.0099
CC1G_00119	475682	1152	19.8422	54.8209	1.46615	hypothetical protein	5e-05
CC1G_00069	439682	1017	0.564524	1.9841	1.81338	C factor cell-cell signaling protein	0.0104
CC1G_00179	463819	591	135.802	310.35	1.19239	vacuolar protein sorting protein 46	5e-05
CC1G_00152	539314	537	39.073	80.4579	1.04206	hypothetical protein	5e-05
CC1G_00121	494668	1695	52.3132	193.443	1.88666	hypothetical protein	5e-05
CC1G_00112	359429	1197	14.3763	34.846	1.2773	TKL/TKL-ccin protein kinase	5e-05
CC1G_00075	416358	694	26.2185	59.3146	1.1778	riboflavin kinase	0.0008
CC1G_00068	359748	1353	1.21926	42.2212	5.11389	hypothetical protein	5e-05
CC1G_05633	374046	801	58.3917	26.0926	-1.16212	PCNA	5e-05
CC1G_05630	374032	1374	29.0207	10.4757	-1.47003	CMGC/SRPK protein kinase	5e-05
CC1G_05631	439709	2097	66.1392	19.3341	-1.77436	hypothetical protein	5e-05
CC1G_05084	374133	720	26.5318	92.1532	1.79631	hypothetical protein	0.0014
CC1G_04675	60290	966	124.573	52.9496	-1.2343	hypothetical protein	5e-05
CC1G_04676	403434	893	6.76505	15.1506	1.1632	hypothetical protein	5e-05
CC1G_04691	60674	2358	33.902	68.1376	1.00708	hypothetical protein	5e-05
CC1G_04694	374162	945	5.94592	17.8918	1.58933	hypothetical protein	5e-05
CC1G_06311	439779	847	5.38758	33.3104	2.62826	hypothetical protein	5e-05
CC1G_08233	374260	1827	26.7485	10.5438	-1.34306	cytochrome P450 monooxygenase pc-3	5e-05
CC1G_08239	481022	614	65.8576	4.04923	-4.02363	hypothetical protein	5e-05
CC1G_08231	544511	2256	0.163424	3.25684	4.31678	hypothetical protein	0.0001
CC1G_06975	500297	3201	35.2494	10.5644	-1.73838	hypothetical protein	5e-05
CC1G_13664	439869	1564	7.91885	16.0836	1.02223	glycosyl transferase	0.00085
CC1G_04626	453208	801	32.8858	9.28828	-1.82398	hypothetical protein	5e-05
CC1G_04617	403755	1045	13.1627	3.74109	-1.81492	hypothetical protein	5e-05
CC1G_04616	544591	1219	149.774	71.2066	-1.07271	hypothetical protein	5e-05
CC1G_04615	403759	952	7.23542	2.89187	-1.32307	hypothetical protein	0.0011
CC1G_14107	464115	636	2.50662	5.80521	1.2116	hypothetical protein	0.01925
CC1G_02410	481114	797	3.41245	7.35002	1.10694	hypothetical protein	0.01615
CC1G_00897	374546	1383	13.0034	6.41583	-1.01918	hypothetical protein	5e-05
CC1G_00893	544612	1629	67.1253	139.615	1.05653	hypothetical protein	5e-05
CC1G_06733	440006	1120	183.017	51.1214	-1.83998	hypothetical protein	5e-05
CC1G_06766	539462	1195	6.5473	1.66601	-1.97451	hypothetical protein	5e-05
CC1G_06807	464275	1737	22.0271	5.67507	-1.95657	hypothetical protein	5e-05
CC1G_06809	494836	1713	28.464	64.0839	1.17082	hypothetical protein	5e-05
CC1G_06714	359956	1731	7.47229	3.68805	-1.01869	integral membrane protein	0.00155
CC1G_06726	359990	999	9.79221	3.65917	-1.42012	hypothetical protein	5e-05
CC1G_06730	511209	1310	20.3074	3.44889	-2.5578	hypothetical protein	5e-05
CC1G_13657	67935	1063	5.01347	12.7158	1.34274	regucalcin	5e-05
CC1G_06791	539485	2358	29.7963	11.3915	-1.38718	hypothetical protein	5e-05
CC1G_06795	494823	2004	15.1945	7.49698	-1.01917	hypothetical protein	5e-05
CC1G_03354	69185	1081	16.947	211.011	3.63822	DJ-1/PfpI family protein	5e-05
CC1G_03346	374632	1014	12.8842	5.53447	-1.21909	hypothetical protein	5e-05
CC1G_03344	481141	1150	0.646112	2.1828	1.75632	hypothetical protein	0.00555
CC1G_03336	490004	1136	2.58518	17.8481	2.78743	hypothetical protein	5e-05
CC1G_10993	544656	998	34.7877	81.3962	1.22638	hypothetical protein	5e-05
CC1G_11008	403897	1828	6.65951	14.0986	1.08206	hypothetical protein	5e-05
CC1G_11005	440127	1570	8.75699	2.12942	-2.03998	hypothetical protein	5e-05
CC1G_11000	374679	1110	22.9537	7.95105	-1.52951	hypothetical protein	5e-05
CC1G_10993	374666	999	61.6036	183.961	1.57831	hypothetical protein	5e-05
CC1G_10989	374658	936	4.04857	10.729	1.40603	hypothetical protein	5e-05
CC1G_14058	440153	800	231.162	13.5588	-4.09161	hypothetical protein	5e-05
CC1G_09628	544665	670	17.8477	8.65404	-1.04429	hypothetical protein	0.00145
CC1G_09632	464328	1938	28.7403	94.2301	1.71311	hypothetical protein	5e-05
CC1G_05962	440168	1800	6.88837	217.76	4.98243	monooxygenase	5e-05
CC1G_05421	374758	1260	36.9259	9.85469	-1.90575	other/AUR protein kinase	5e-05
CC1G_05417	464348	780	29.6081	188.696	2.672	hypothetical protein	5e-05
CC1G_05419	374792	2010	18.2911	7.782	-1.23293	hypothetical protein	5e-05
CC1G_05409	440190	2331	38.711	1298.46	5.06792	614/534 cytochrome P450	5e-05
CC1G_09190	440206	939	2.87165	0.619657	-2.21234	hypothetical protein	0.0118
CC1G_09189	404033	651	585.865	217.238	-1.43129	hydrophobin-315	5e-05
CC1G_09182	374824	366	200.783	640.859	1.67437	hypothetical protein	5e-05
CC1G_09196	440201	911	35.4887	8.36823	-2.08437	hypothetical protein	5e-05
CC1G_01589	440254	2066	4.57339	20.7658	2.18288	hypothetical protein	5e-05
CC1G_15267	490081	1455	2.20854	0.589803	-1.90479	metalloprotease 1	0.0165
CC1G_01596	374867	2631	106.808	33.1736	-1.68692	hypothetical protein	5e-05
CC1G_15264	464395	906	4.74485	11.1527	1.23296	hypothetical protein	0.0001
CC1G_03057	464403	4377	11.4744	4.46317	-1.36228	hypothetical protein	5e-05
CC1G_03065	404139	1316	4.85373	0.847865	-2.51719	hypothetical protein	5e-05
CC1G_03064	544744	1099	12.0003	4.05505	-1.56527	other/FunK1 protein kinase	5e-05
CC1G_03066	440286	2306	20.0891	41.4518	1.04502	mucoidy inhibitor A	5e-05
CC1G_03074	404166	2815	12.4547	5.1474	-1.27477	hypothetical protein	5e-05
CC1G_11591	490115	1179	34.2261	13.4881	-1.34341	hypothetical protein	5e-05
CC1G_15417	481269	2867	0.610298	3.21877	2.39892	glycyl-tRNA synthetase	5e-05
CC1G_05095	500550	2070	12.7435	4.5982	-1.47062	cell division control protein 45	5e-05
CC1G_05099	374995	756	10.1002	20.6998	1.03524	hypothetical protein	5e-05
CC1G_14099	464479	2322	58.9675	471.509	2.99929	hypothetical protein	5e-05
CC1G_14098	500579	1809	3.47571	7.43336	1.09671	protein kinase subdomain-containing protein PKL/ccin9	5e-05
CC1G_10294	74935	3948	10.336	2.75914	-1.90538	hypothetical protein	5e-05
CC1G_11230	464561	783	21.5374	1.04016	-4.37197	hypothetical protein	0.00265
CC1G_11228	360271	1746	7.80218	17.2634	1.14577	hypothetical protein	5e-05
CC1G_11221	360199	1332	88.9053	21.0432	-2.07892	hypothetical protein	5e-05
CC1G_13213	464503	1023	8.51204	2.91397	-1.54652	glycerophosphoryl diester phosphodiesterase	5e-05
CC1G_10297	440409	840	12.3687	5.52155	-1.16355	methylase	0.00075
CC1G_10296	360249	990	6.3729	2.20742	-1.52959	uracil-DNA glycosylase	0.00045
CC1G_13623	494902	387	70.4074	145.277	1.04501	hypothetical protein	0.0004
CC1G_11217	539581	6961	63.0175	29.9742	-1.07203	hypothetical protein	5e-05
CC1G_06057	464582	1044	50.2627	23.5746	-1.09225	PER1	5e-05
CC1G_06058	375126	414	162.204	433.111	1.41692	endoribonuclease L-psp family protein	5e-05
CC1G_06074	440521	1253	24.3999	107.859	2.1442	hypothetical protein	5e-05
CC1G_02514	464614	2007	36.8179	16.9401	-1.11996	other/FunK1 protein kinase	5e-05
CC1G_02507	375207	1539	14.8176	31.7478	1.09935	O-methylsterigmatocystin oxidoreductase	5e-05
CC1G_02506	512348	1419	3.33006	17.5243	2.39574	O-methylsterigmatocystin oxidoreductase	5e-05
CC1G_02761	440563	985	1165.04	219.399	-2.40874	hypothetical protein	5e-05
CC1G_02747	544855	529	4.89809	116.94	4.5774	endoribonuclease L-PSP	5e-05
CC1G_02745	481379	750	964.614	405.923	-1.24875	hypothetical protein	5e-05
CC1G_02748	440580	1141	4.04275	1.04443	-1.95262	hypothetical protein	0.00265
CC1G_05809	78464	2054	72.4779	22.4478	-1.69097	hypothetical protein	5e-05
CC1G_05817	500655	1389	4.30069	1.24356	-1.79009	salicylate 1-monooxygenase	0.0001
CC1G_05819	464658	582	174.192	497.866	1.51508	hypothetical protein	5e-05
CC1G_05820	404475	926	9.08347	22.885	1.33309	hypothetical protein	5e-05
CC1G_05821	544872	723	2.93806	7.23721	1.30057	hypothetical protein	0.00635
CC1G_05824	453654	1182	854.072	74.6389	-3.51636	hypothetical protein	5e-05
CC1G_02842	464681	804	69.9108	29.9711	-1.22194	hypothetical protein	5e-05
CC1G_02853	430632	1126	26.0285	76.3089	1.55176	adenosine deaminase-like protein	5e-05
CC1G_07758	490258	2315	19.9313	6.73659	-1.56495	hypothetical protein	5e-05
CC1G_10153	500697	1918	34.443	9.71289	-1.82624	hypothetical protein	5e-05
CC1G_05602	500699	3495	10.1362	3.89347	-1.38039	hypothetical protein	5e-05
CC1G_10169	464714	513	13.9434	81.1404	2.54084	hypothetical protein	5e-05
CC1G_09468	440666	1983	11.8378	4.5131	-1.39121	hypothetical protein	5e-05
CC1G_09462	440676	1057	33.7718	8.66134	-1.96316	hypothetical protein	5e-05
CC1G_11857	464759	1491	3.3233	1.16853	-1.50793	hypothetical protein	0.0007
CC1G_11844	430758	917	61.4605	20.4123	-1.59022	hypothetical protein	5e-05
CC1G_15502	544958	1375	44.1199	10.9429	-2.01144	hypothetical protein	5e-05
CC1G_01221	485698	1476	235.382	528.044	1.16565	methionine adenosyltransferase	5e-05
CC1G_13873	82389	1194	35.8853	7.94653	-2.175	hypothetical protein	5e-05
CC1G_00651	440860	4279	17.3702	6.11418	-1.50638	hypothetical protein	5e-05
CC1G_08912	464912	1152	2.81826	0.985202	-1.51631	hypothetical protein	0.0184
CC1G_09057	464952	762	70.3589	31.2997	-1.16858	hypothetical protein	5e-05
CC1G_14336	453889	2328	41.3582	126.683	1.61498	NA	5e-05
CC1G_09060	375708	1518	15.931	73.4179	2.20429	hypothetical protein	5e-05
CC1G_11367	464965	1137	4.51154	1.62544	-1.47279	hypothetical protein	0.00235
CC1G_11374	86696	513	18.4409	3.23412	-2.51146	hypothetical protein	0.01835
CC1G_11371	500855	906	6.61959	2.786	-1.24855	hypothetical protein	0.00415
CC1G_11355	87116	2157	21.1047	157.306	2.89793	FAD binding domain-containing protein	5e-05
CC1G_15663	404921	3191	6.22865	1.77875	-1.80806	2OG-Fe[II] oxygenase	5e-05
CC1G_09674	545067	3239	34.1111	9.81841	-1.79668	hypothetical protein	5e-05
CC1G_09666	464990	1284	3.96993	10.5883	1.41528	hypothetical protein	5e-05
CC1G_09669	440986	1331	5.09496	0.451376	-3.49667	hypothetical protein	0.0048
CC1G_09671	545063	1973	15.8165	34.0723	1.10717	hypothetical protein	5e-05
CC1G_04005	431038	1248	0.203481	39.8385	7.61312	hypothetical protein	0.0026
CC1G_00054	431070	2038	6.60058	1.55805	-2.08285	cell division cycle protein cdt2	0.0007
CC1G_00058	375908	2118	99.6547	208.754	1.06679	5-aminolevulinate synthase	5e-05
CC1G_00063	431090	1844	4.40946	51.0838	3.53419	hypothetical protein	5e-05
CC1G_08018	500945	888	6.70563	1.2654	-2.40578	hypothetical protein	0.00015
CC1G_09607	481635	1354	38.0145	7.05635	-2.42956	hypothetical protein	5e-05
CC1G_09595	453986	2988	3.74933	8.8399	1.2374	hypothetical protein	5e-05
CC1G_05239	360868	2004	25.1978	56.1021	1.15476	hypothetical protein	5e-05
CC1G_05267	539727	1447	27.0976	13.4401	-1.01162	cytoplasmic protein	5e-05
CC1G_05269	391177	999	8.49338	51.94	2.61243	hypothetical protein	5e-05
CC1G_05277	90822	2096	74.0758	160.69	1.1172	hypothetical protein	5e-05
CC1G_05290	441197	1445	8.11773	16.3105	1.00665	hypothetical protein	5e-05
CC1G_15700	476113	2091	68.2932	488.99	2.83999	hypothetical protein	5e-05
CC1G_05236	465073	1617	8.28479	3.07781	-1.42856	glutamate decarboxylase	5e-05
CC1G_05248	476055	2799	4.93491	1.14383	-2.10915	hypothetical protein	5e-05
CC1G_05259	90133	1950	81.0789	29.9698	-1.43582	hypothetical protein	5e-05
CC1G_15693	441181	1029	24.1016	125.827	2.38424	hypothetical protein	5e-05
CC1G_15697	91028	3946	26.5265	70.8375	1.41708	shuttle craft protein	5e-05
CC1G_05295	417392	1770	1.18009	5.69215	2.27008	alpha-L-arabinofuranosidase A	5e-05
CC1G_05298	485770	718	309.39	1053.12	1.76717	hypothetical protein	5e-05
CC1G_05304	360717	1563	2.36356	0.594386	-1.99149	rhamnogalacturonase B	0.00425
CC1G_08757	91683	938	51.7343	214.237	2.05002	hypothetical protein	5e-05
CC1G_08759	454076	324	3001.68	1480.12	-1.02006	hypothetical protein	5e-05
CC1G_08760	465163	462	47.4523	9.90291	-2.26055	hypothetical protein	0.0011
CC1G_08761	91997	2195	30.0517	10.4068	-1.52992	hypothetical protein	5e-05
CC1G_08768	545148	855	2.23427	6.47858	1.53587	hypothetical protein	0.0015
CC1G_08769	441242	992	21.1685	398.326	4.23396	hypothetical protein	5e-05
CC1G_07835	92341	1747	3.13386	0.872403	-1.84488	hypothetical protein	0.00025
CC1G_07832	481668	1761	14.7778	35.1756	1.25115	hypothetical protein	5e-05
CC1G_14863	376154	2649	6.27636	3.03229	-1.04952	hypothetical protein	5e-05
CC1G_09996	454129	651	9.20207	4.23573	-1.11935	hypothetical protein	0.01155
CC1G_09999	431338	1364	8.11623	2.80867	-1.53092	hypothetical protein	5e-05
CC1G_10005	490490	1221	14.572	6.84895	-1.08925	hypothetical protein	5e-05
CC1G_07224	376208	3828	12.8808	6.39663	-1.00984	hypothetical protein	5e-05
CC1G_09991	501026	540	63.5343	138.177	1.12091	hypothetical protein	5e-05
CC1G_11695	441344	2160	27.7419	3.20793	-3.11235	glucoamylase	5e-05
CC1G_11689	490518	1421	2.58528	0.890867	-1.53704	hypothetical protein	0.0079
CC1G_03423	545253	1325	1.51797	4.37309	1.52651	hypothetical protein	0.0023
CC1G_12899	376417	1242	4.17228	8.39363	1.00846	hypothetical protein	0.0001
CC1G_05440	95697	968	158.789	30.5726	-2.3768	hypothetical protein	5e-05
CC1G_09302	95811	1016	5.3097	18.8732	1.82964	hypothetical protein	5e-05
CC1G_14307	465337	1323	11.6065	27.2408	1.23084	hypothetical protein	5e-05
CC1G_09288	545300	1216	0.652839	2.1423	1.71436	monooxygenase	0.01905
CC1G_09286	441482	1367	18.7979	9.26267	-1.02107	hypothetical protein	5e-05
CC1G_10332	354569	585	5.38054	26.895	2.32152	hypothetical protein	0.0005
CC1G_06454	473786	1728	3.69033	1.64162	-1.16863	hypothetical protein	0.0005
CC1G_06458	441540	1070	7.42878	1.19342	-2.63803	GDSL lipase/acylhydrolase	5e-05
CC1G_06464	465387	1974	3.16254	1.51583	-1.06098	hypothetical protein	0.00565
CC1G_06502	354640	909	3.88239	21.2843	2.45477	hypothetical protein	5e-05
CC1G_06513	441597	1170	365.427	98.544	-1.89074	Gpr1 family protein	5e-05
CC1G_06519	441612	1115	4.93544	37.4317	2.92301	hypothetical protein	5e-05
CC1G_14879	99259	2119	9.62102	4.49047	-1.09932	carboxypeptidase s	5e-05
CC1G_04422	354495	777	258.194	93.4637	-1.46598	hypothetical protein	5e-05
CC1G_08625	354748	1308	30.0102	14.086	-1.09119	hypothetical protein	5e-05
CC1G_15580	537513	1345	3.02088	1.35251	-1.15933	D-lactaldehyde dehydrogenase	0.0128
CC1G_10327	537526	2303	3.49897	0.583501	-2.58413	Drp1p	5e-05
CC1G_06526	98755	1108	750.431	350.102	-1.09994	hypothetical protein	5e-05
CC1G_07296	385449	1838	12.5526	5.63406	-1.15573	hypothetical protein	5e-05
CC1G_07300	537610	1455	16.8367	1.53232	-3.45782	hypothetical protein	5e-05
CC1G_07313	454337	933	160.342	77.4647	-1.04954	glucan 1,3-beta-glucosidase	5e-05
CC1G_07314	441645	1272	11.9686	32.4972	1.44106	short-chain dehydrogenase/reductase SDR	5e-05
CC1G_05722	441663	4452	18.4809	8.15638	-1.18003	DNA polymerase alpha catalytic subunit	5e-05
CC1G_05727	465489	1521	0.601816	2.51671	2.06414	drug transporter	0.00125
CC1G_05741	537653	6174	9.35242	2.8048	-1.73744	hypothetical protein	5e-05
CC1G_05754	411775	1747	1.12527	2.64666	1.2339	endopeptidase	0.0015
CC1G_04396	492876	282	518.452	196.972	-1.39622	histone 3	5e-05
CC1G_00716	417466	2248	5.06001	1.72413	-1.55327	hypothetical protein	5e-05
CC1G_00714	391313	1736	2.34819	7.30758	1.63785	hypothetical protein	5e-05
CC1G_10113	465631	573	63.7159	26.3405	-1.27437	hypothetical protein	5e-05
CC1G_00718	465586	477	71.1507	18.9691	-1.90722	hypothetical protein	5e-05
CC1G_00723	539794	669	7305.4	2008.69	-1.86271	CGL3 lectin	5e-05
CC1G_10109	441837	2094	4.31822	2.01234	-1.10156	hypothetical protein	5e-05
CC1G_04980	465637	1638	2.07095	0.833501	-1.31304	hypothetical protein	0.01165
CC1G_04973	490594	1809	13.2449	56.0649	2.08166	hypothetical protein	5e-05
CC1G_04362	441882	661	49.9999	5.90305	-3.08239	hypothetical protein	5e-05
CC1G_15810	454515	900	7.38104	3.18121	-1.21425	NA	0.00115
CC1G_00596	376674	675	16.84	6.83021	-1.30189	hypothetical protein	0.0002
CC1G_13671	376687	2415	3.26707	8.41354	1.36471	cellulose-binding beta-glucosidase	5e-05
CC1G_03713	501218	471	33.3991	6.26	-2.41557	hypothetical protein	0.0173
CC1G_04581	501256	1047	8.26164	1.23292	-2.74435	hypothetical protein	5e-05
CC1G_04898	501261	3171	4.94058	18.9435	1.93895	hypothetical protein	5e-05
CC1G_04906	442002	457	12.9587	35.8882	1.46959	hypothetical protein	0.00685
CC1G_08041	442015	1377	11.8029	49.4381	2.06648	hypothetical protein	5e-05
CC1G_08053	490697	1157	2.4119	19.0847	2.98417	hypothetical protein	5e-05
CC1G_08037	501273	1722	47.4778	112.34	1.24255	hypothetical protein	5e-05
CC1G_08047	376888	870	3.02548	42.002	3.79522	NmrA family protein	5e-05
CC1G_02221	481955	4512	131.23	46.44	-1.49866	hypothetical protein	5e-05
CC1G_15350	376916	927	41.8274	11.3632	-1.88007	metalloprotease	5e-05
CC1G_15349	431957	577	17.3555	3.48156	-2.31759	hypothetical protein	0.00605
CC1G_02211	442042	1241	168.293	342.979	1.02714	oxidoreductase	5e-05
CC1G_07009	545454	2439	6.38787	2.37503	-1.42739	other/FunK1 protein kinase	5e-05
CC1G_05174	515752	2129	10.0895	4.64827	-1.11809	hypothetical protein	0.0019
CC1G_05127	442128	2113	13.7548	5.76529	-1.25447	Rad21 protein	5e-05
CC1G_05123	442131	1334	515.028	255.55	-1.01105	hypothetical protein	5e-05
CC1G_05184	539847	1215	7.63313	23.5735	1.62682	RTC domain containing 1	5e-05
CC1G_05165	417682	986	45.6712	113.578	1.31433	hypothetical protein	5e-05
CC1G_05144	495249	1581	28.3408	13.6365	-1.05541	alpha-amylase	5e-05
CC1G_05142	454684	1026	20.0072	9.74212	-1.03821	mitochondrial nuclease	5e-05
CC1G_10480	405959	1232	7.99673	38.7609	2.27712	hypothetical protein	5e-05
CC1G_15369	376988	960	38.1986	15.0341	-1.34528	hypothetical protein	5e-05
CC1G_08415	501340	1497	5.83751	2.5186	-1.21273	hypothetical protein	5e-05
CC1G_08419	481994	987	1.56869	4.26172	1.44187	hypothetical protein	0.0072
CC1G_08428	545488	512	275.441	65.8885	-2.06364	hypothetical protein	5e-05
CC1G_10672	442195	1135	4.42628	1.21746	-1.86222	hypothetical protein	0.00195
CC1G_10683	432064	2508	5.53394	1.32893	-2.05804	hypothetical protein	5e-05
CC1G_07233	545505	2289	4.35365	1.98959	-1.12976	hypothetical protein	5e-05
CC1G_14789	377134	1110	15.3912	2.93844	-2.38898	hypothetical protein	5e-05
CC1G_04026	406096	1094	45.7392	22.7049	-1.01043	hypothetical protein	5e-05
CC1G_10582	377156	1440	14.6223	3.80453	-1.94238	endoglucanase family 5 glycoside hydrolase	5e-05
CC1G_03048	112927	2194	5.36755	2.47006	-1.11972	hypothetical protein	5e-05
CC1G_03045	466015	1443	6.56383	94.8106	3.85244	membrane protein	5e-05
CC1G_03041	501431	1257	11.6418	25.4396	1.12777	hypothetical protein	5e-05
CC1G_03054	442281	1769	29.8804	60.8666	1.02645	hypothetical protein	5e-05
CC1G_03050	545558	1540	4.36625	1.38341	-1.65817	hypothetical protein	5e-05
CC1G_13761	377260	4113	79.4736	37.3702	-1.08859	hypothetical protein	5e-05
CC1G_00680	454808	2613	5.9743	32.6204	2.44893	ATP dependent DNA ligase	5e-05
CC1G_13763	516390	3004	27.2978	12.858	-1.08612	hypothetical protein	5e-05
CC1G_13764	377250	1713	19.3418	7.59007	-1.34954	smc4 chromosome structural maintenance 4-like protein	5e-05
CC1G_06710	442333	1230	20.2679	83.9303	2.05	hypothetical protein	5e-05
CC1G_08880	113931	885	79.8066	205.448	1.3642	hypothetical protein	5e-05
CC1G_06207	466066	1701	2.43547	0.645412	-1.91591	hypothetical protein	0.0013
CC1G_06218	361482	2478	0.667089	3.18818	2.25678	hypothetical protein	5e-05
CC1G_08058	495335	1257	160.504	327.021	1.02677	macrofage activating glycoprotein	5e-05
CC1G_08059	361327	1590	11.4678	3.09212	-1.89093	hypothetical protein	5e-05
CC1G_08064	442457	1286	7.72755	2.52182	-1.61555	hypothetical protein	5e-05
CC1G_08067	116146	1857	24.4747	6.79873	-1.84795	macrofage activating glycoprotein	5e-05
CC1G_08072	116364	2038	3.85378	1.67499	-1.20212	hypothetical protein	5e-05
CC1G_06225	361522	1458	21.1589	135.825	2.68242	oxalate decarboxylase	5e-05
CC1G_06245	442435	2301	56.7065	712.213	3.65072	hypothetical protein	5e-05
CC1G_06249	361342	1413	207.274	25.021	-3.05032	phosphatidylserine decarboxylase	5e-05
CC1G_14477	442447	1650	65.7354	30.8246	-1.09259	lysozyme	5e-05
CC1G_08066	361505	1278	55.4328	4.75236	-3.54402	macrofage activating glycoprotein	5e-05
CC1G_08068	116193	772	60.5877	5.95723	-3.34631	hypothetical protein	5e-05
CC1G_13219	116663	967	41.9675	18.6712	-1.16846	hypothetical protein	5e-05
CC1G_13434	545612	1169	131.178	9.76223	-3.74818	secreted protein	5e-05
CC1G_13195	482122	866	37.6099	2.42243	-3.95658	hypothetical protein	5e-05
CC1G_08651	377371	387	21.6559	59.4598	1.45715	hypothetical protein	0.01155
CC1G_05532	545631	1153	5.58528	1.66609	-1.74517	hypothetical protein	0.00015
CC1G_02238	117152	1420	127.299	48.7637	-1.38434	metalloprotease	5e-05
CC1G_02385	501514	960	50.1983	24.1251	-1.0571	hypothetical protein	5e-05
CC1G_14287	482144	777	203.752	473.912	1.21781	hypothetical protein	5e-05
CC1G_02374	490873	1681	1.66274	0.626761	-1.40757	hypothetical protein	0.0203
CC1G_02376	406379	4230	1.93068	15.8103	3.03368	hypothetical protein	5e-05
CC1G_10183	432451	2723	12.2716	29.1891	1.25011	ubiquitin carboxyl-terminal hydrolase 5	5e-05
CC1G_08584	442552	2278	38.5663	13.3039	-1.53549	hypothetical protein	5e-05
CC1G_08593	545670	1078	50.5554	12.6297	-2.00104	hypothetical protein	5e-05
CC1G_09641	118644	1877	13.7978	44.867	1.70121	hypothetical protein	5e-05
CC1G_09647	490908	1105	10.2426	2.54489	-2.00891	hypothetical protein	5e-05
CC1G_12127	482207	1609	11.1731	37.3074	1.73943	hypothetical protein	5e-05
CC1G_06149	432595	1182	5.386	40.4302	2.90815	sterol 24-C-methyltransferase	5e-05
CC1G_06143	377661	684	10.3281	2.6425	-1.9666	hypothetical protein	0.00495
CC1G_06139	545723	538	199.682	68.849	-1.5362	hypothetical protein	5e-05
CC1G_06133	119597	1861	5.09127	21.4466	2.07465	hypothetical protein	5e-05
CC1G_14013	501614	351	51.7547	12.4646	-2.05385	hypothetical protein	0.00555
CC1G_06825	361584	2172	133.144	298.664	1.16554	FAD linked oxidase domain-containing protein	5e-05
CC1G_11541	540056	3187	15.7756	6.27232	-1.33062	endo-1,3[4]-Beta-Glucanase chain A	0.01125
CC1G_06876	466289	735	79.0506	321.47	2.02384	hypothetical protein	5e-05
CC1G_06870	119838	2256	76.4593	158.175	1.04876	methyltransferase type 11	5e-05
CC1G_06868	517049	1264	3.72306	34.5704	3.21498	glycosyl hydrolase family 16	5e-05
CC1G_06867	442673	918	83.2356	234.733	1.49575	hypothetical protein	5e-05
CC1G_06859	120094	1943	9.08672	22.8954	1.33322	kyphoscoliosis peptidase	0.0027
CC1G_06849	442697	1979	32.6388	66.3556	1.02363	hypothetical protein	5e-05
CC1G_11550	442738	2549	17.9252	8.40106	-1.09335	hypothetical protein	0.0007
CC1G_11547	418208	1588	6.93768	1.93271	-1.84383	hypothetical protein	5e-05
CC1G_08894	406636	1208	5.35229	1.23146	-2.11979	hypothetical protein	5e-05
CC1G_08904	466395	696	10.2247	1.32361	-2.9495	hypothetical protein	0.011
CC1G_08897	501639	579	50.5452	21.4838	-1.23432	hypothetical protein	5e-05
CC1G_02861	501653	2103	90.9313	28.8917	-1.65412	hypothetical protein	5e-05
CC1G_02864	455126	1170	1.48696	3.34692	1.17046	hypothetical protein	0.01225
CC1G_02860	442792	1738	126.93	21.4646	-2.564	mannanase	5e-05
CC1G_08265	432746	736	7.14227	2.31231	-1.62704	hypothetical protein	0.01275
CC1G_06129	432760	1700	7.9742	3.83833	-1.05486	hypothetical protein	5e-05
CC1G_06126	122920	1996	5.05541	28.9722	2.51877	hypothetical protein	5e-05
CC1G_06126	122918	1914	18.0407	45.5448	1.33603	hypothetical protein	5e-05
CC1G_08484	545797	4193	10.3475	5.02146	-1.0431	ich1 protein	5e-05
CC1G_08490	377865	1764	1.77676	7.5258	2.0826	aryl-alcohol oxidase	5e-05
CC1G_08491	432792	1048	155.486	858.075	2.46432	hypothetical protein	5e-05
CC1G_03087	501710	2193	206.44	96.2083	-1.10149	metalloreductase	5e-05
CC1G_03089	501712	285	840.325	208.128	-2.01348	hypothetical protein	5e-05
CC1G_03081	377914	672	12.8758	4.67776	-1.46077	hypothetical protein	0.00185
CC1G_03088	377901	801	14.9709	4.96862	-1.59124	hypothetical protein	5e-05
CC1G_03092	482323	1571	3.57078	0.442081	-3.01386	hypothetical protein	0.0008
CC1G_04337	482332	836	27.2151	65.6475	1.27033	hypothetical protein	5e-05
CC1G_04336	432876	874	20.251	53.2426	1.39459	hypothetical protein	5e-05
CC1G_04342	501720	1932	7.72155	3.69738	-1.06239	hypothetical protein	5e-05
CC1G_15759	466486	5973	3.57339	1.19175	-1.58422	hypothetical protein	5e-05
CC1G_05573	442931	865	77.3213	545.517	2.81868	hypothetical protein	5e-05
CC1G_05574	442932	1122	27.4602	291.792	3.40953	hydrolase	5e-05
CC1G_05561	377981	1761	4.95347	1.81073	-1.45186	hypothetical protein	5e-05
CC1G_12299	442944	998	7.93436	2.7928	-1.5064	hypothetical protein	5e-05
CC1G_15200	361787	735	2.4264	0.53625	-2.17784	hypothetical protein	0.00625
CC1G_03477	126040	1984	11.4462	4.42613	-1.37075	hypothetical protein	5e-05
CC1G_11068	495511	1428	9.95233	189.4	4.25026	hypothetical protein	5e-05
CC1G_11067	466576	1686	2.00369	4.81268	1.26418	alpha-mannosidase 1	5e-05
CC1G_03517	442966	3799	3.09772	6.61091	1.09364	plasma membrane H[+]-ATPase 1	5e-05
CC1G_03512	442977	590	172.261	434.044	1.33324	hypothetical protein	5e-05
CC1G_03496	442991	1808	22.7365	140.866	2.63124	NADH:flavin oxidoreductase/NADH oxidase	5e-05
CC1G_03493	455254	606	628.57	168.334	-1.90075	hypothetical protein	5e-05
CC1G_12446	482360	1575	2.33573	0.614348	-1.92675	hypothetical protein	0.00535
CC1G_12261	378065	1779	1.44843	3.75226	1.37327	pyranose dehydrogenase	0.0002
CC1G_04066	127303	720	7.1015	3.06638	-1.21159	hypothetical protein	0.01745
CC1G_04061	482370	852	121.172	3.07712	-5.29933	hypothetical protein	5e-05
CC1G_09081	378186	3924	5.47472	1.93482	-1.50058	hypothetical protein	5e-05
CC1G_09088	433064	1722	703.247	69.7573	-3.33362	mannoprotein	5e-05
CC1G_08310	433115	728	14.9569	39.4723	1.40002	hypothetical protein	5e-05
CC1G_08641	129746	1110	23.6784	11.0804	-1.09556	ATP-dependent Clp protease proteolytic subunit	0.001
CC1G_06987	501856	2499	11.5111	56.1843	2.28715	hypothetical protein	5e-05
CC1G_12115	545958	1824	24.9411	10.4787	-1.25107	WD repeat-containing protein slp1	5e-05
CC1G_04961	418465	747	43.5308	88.2209	1.01909	hypothetical protein	5e-05
CC1G_03033	466770	3018	22.5614	10.6142	-1.08786	other/TTK protein kinase	5e-05
CC1G_03025	540181	4062	167.971	687.199	2.03252	multidrug resistance protein 1	5e-05
CC1G_00748	362054	978	8.65145	2.32945	-1.89295	hypothetical protein	0.00035
CC1G_00753	443258	1258	20.6736	5.03222	-2.03853	hypothetical protein	5e-05
CC1G_00759	495538	906	10.4276	3.39519	-1.61884	hypothetical protein	5e-05
CC1G_03016	466786	2070	1.76702	0.554224	-1.67278	SEC14 cytosolic factor	0.0036
CC1G_02983	378371	1095	27.918	71.0847	1.34834	hypothetical protein	5e-05
CC1G_07789	482487	1090	2.22819	79.899	5.16424	hypothetical protein	5e-05
CC1G_07790	545978	356	48.4807	167.843	1.79163	hypothetical protein	0.0002
CC1G_07792	518209	1186	5.32746	1.35377	-1.97646	serine proteinase	0.00015
CC1G_07797	501903	1599	353.954	739.492	1.06297	glucose transporter	5e-05
CC1G_07799	443382	2751	1.8979	6.41644	1.75737	hypothetical protein	5e-05
CC1G_07806	501911	1002	12.5295	40.6428	1.69767	lariat debranching enzyme	5e-05
CC1G_15468	133073	2989	37.8085	16.2587	-1.2175	hypothetical protein	5e-05
CC1G_07800	378406	672	35.8202	87.1003	1.2819	hypothetical protein	5e-05
CC1G_07759	518260	1784	7.28741	1.79089	-2.02473	hypothetical protein	5e-05
CC1G_15462	378489	1932	12.7895	4.08163	-1.64775	hypothetical protein	5e-05
CC1G_00697	378537	2268	4.8586	0.821614	-2.56401	pumilio-family RNA binding repeat protein	5e-05
CC1G_00690	443425	2157	2.53522	314.53	6.95494	laccase 5	5e-05
CC1G_00692	546013	1526	2.10382	5.33276	1.34187	hypothetical protein	5e-05
CC1G_06645	501966	1353	13.4046	164.604	3.6182	hypothetical protein	5e-05
CC1G_04854	378628	720	9.41025	36.8571	1.96964	hypothetical protein	5e-05
CC1G_04855	378617	3852	7.70952	23.3283	1.59737	multidrug resistance protein 1	5e-05
CC1G_04857	134710	678	3.53396	0.689032	-2.35865	hypothetical protein	0.01225
CC1G_02718	501998	3081	5.83859	2.44605	-1.25517	hypothetical protein	5e-05
CC1G_02719	433472	1513	3.04061	7.92952	1.38287	CMGC/SRPK protein kinase	5e-05
CC1G_00958	455574	1143	73.5647	30.836	-1.2544	hypothetical protein	5e-05
CC1G_00984	455597	1563	26.2051	9.00029	-1.5418	hst3 protein	5e-05
CC1G_00998	136858	814	18.1003	4.74184	-1.93249	hypothetical protein	5e-05
CC1G_09018	362183	2001	12.0463	5.82892	-1.04729	hypothetical protein	5e-05
CC1G_00967	466933	1116	28.3586	123.985	2.12831	hypothetical protein	5e-05
CC1G_07841	378714	1485	4.41555	2.15855	-1.03253	hypothetical protein	0.00145
CC1G_07839	443610	885	110.651	268.08	1.27664	hypothetical protein	5e-05
CC1G_03200	433532	1098	37.2227	85.1663	1.1941	hypothetical protein	5e-05
CC1G_05478	139008	2182	17.8733	37.6332	1.0742	hypothetical protein	5e-05
CC1G_08940	455699	1482	1.39113	3.10912	1.16025	hypothetical protein	0.0022
CC1G_08941	491291	768	21.3421	8.51004	-1.32646	hypothetical protein	5e-05
CC1G_08945	502065	1563	1.1985	69.417	5.85599	cytochrome P450	5e-05
CC1G_08950	491298	1314	49.267	169.04	1.77868	metalloprotease	5e-05
CC1G_08962	407588	1273	19.6846	66.1602	1.74889	hypothetical protein	5e-05
CC1G_08961	139333	1350	7.48456	33.3531	2.15583	hypothetical protein	5e-05
CC1G_15751	467082	1152	1.4264	5.21654	1.87072	hypothetical protein	0.0011
CC1G_15752	482636	1506	17.058	3.09302	-2.46336	hypothetical protein	5e-05
CC1G_08966	502078	1761	3.54955	1.54686	-1.1983	hypothetical protein	0.00045
CC1G_08965	378870	855	0.972148	16.2828	4.06603	HPP family protein	0.0028
CC1G_02714	407604	1639	2.42095	460.208	7.57057	peroxidase TAP	5e-05
CC1G_02707	139620	884	28.8882	3.23919	-3.15678	hypothetical protein	5e-05
CC1G_04828	491323	1016	8.73624	141.668	4.01935	hypothetical protein	5e-05
CC1G_09045	379027	1311	3.92979	1.33221	-1.56063	hypothetical protein	0.00055
CC1G_04641	379022	1470	26.1125	59.4443	1.1868	hypothetical protein	5e-05
CC1G_04640	379012	1518	39.9727	94.6184	1.24311	hypothetical protein	5e-05
CC1G_14334	482673	1714	7.11196	3.39668	-1.06612	hypothetical protein	5e-05
CC1G_06176	443761	1309	16.7807	61.3848	1.87108	hypothetical protein	5e-05
CC1G_06174	362480	1497	35.067	123.912	1.82113	homogentisate 1,2-dioxygenase	5e-05
CC1G_10060	467187	1245	11.2438	38.0416	1.75845	hypothetical protein	5e-05
CC1G_10058	362439	816	222.53	110.209	-1.01375	hypothetical protein	5e-05
CC1G_10038	476698	1114	62.8413	28.8466	-1.12331	B-[1-6] glucan synthase	5e-05
CC1G_10035	362482	1674	1.70418	3.44174	1.01406	hypothetical protein	0.00095
CC1G_06169	362412	1242	27.8499	10.3194	-1.43231	hypothetical protein	5e-05
CC1G_10069	362515	663	40.7387	84.3068	1.04925	hypothetical protein	5e-05
CC1G_10068	476668	1717	23.9055	50.7368	1.08569	hypothetical protein	5e-05
CC1G_10061	362384	1575	66.2317	20.0101	-1.72679	hypothetical protein	5e-05
CC1G_10053	495707	924	2.52146	5.4181	1.10353	hypothetical protein	0.0108
CC1G_10044	495715	1377	58.0508	7.61065	-2.93123	hypothetical protein	5e-05
CC1G_05839	546172	1420	34.9733	9.3938	-1.89647	hypothetical protein	5e-05
CC1G_05834	142396	1915	20.1373	9.62031	-1.06572	hypothetical protein	5e-05
CC1G_05832	443845	2580	2.30961	0.833791	-1.46989	hypothetical protein	5e-05
CC1G_07425	546202	3263	2.45118	0.909068	-1.43102	other/FunK1 protein kinase	5e-05
CC1G_12700	433823	2334	4.81961	1.60542	-1.58597	protein kinase subdomain-containing protein PKL	5e-05
CC1G_11777	443899	1288	47.7578	194.928	2.02914	NAD-binding Rossmann fold oxidoreductase	5e-05
CC1G_11776	546212	846	140.332	371.459	1.40436	hypothetical protein	5e-05
CC1G_11776	546211	431	55.3654	8.83863	-2.64709	hypothetical protein	0.00285
CC1G_11775	443904	1184	0.530013	5.94573	3.48776	hypothetical protein	0.00525
CC1G_03119	433858	1458	4.54619	1.70485	-1.41501	squalene monooxygenase	5e-05
CC1G_08561	443942	1648	78.4408	4.98981	-3.97455	hypothetical protein	5e-05
CC1G_08560	502224	1689	81.2279	234.822	1.53152	RNA binding protein	5e-05
CC1G_10198	546245	1344	18.9726	7.6841	-1.30397	hypothetical protein	5e-05
CC1G_10206	407897	785	8.22161	1.57795	-2.38137	hypothetical protein	0.0147
CC1G_13827	443946	1430	10.4139	26.7625	1.36171	hypothetical protein	5e-05
CC1G_10202	379250	1233	206.972	64.5659	-1.68059	hypothetical protein	5e-05
CC1G_10205	443953	880	2.88881	13.0053	2.17055	hypothetical protein	5e-05
CC1G_01557	502247	1116	2.26292	0.71796	-1.65621	hypothetical protein	0.0203
CC1G_01562	379266	3381	2.53888	0.749843	-1.75953	hypothetical protein	5e-05
CC1G_01561	144023	1450	8.46421	3.89954	-1.11807	hypothetical protein	5e-05
CC1G_01554	433946	1007	1.41326	4.04626	1.51757	hypothetical protein	0.014
CC1G_07137	467343	1605	5.40459	1.26619	-2.09369	hypothetical protein	5e-05
CC1G_07139	362579	645	10.3714	47.2979	2.18916	hypothetical protein	5e-05
CC1G_07170	444033	1148	3.31974	15.5475	2.22754	hypothetical protein	5e-05
CC1G_07125	362606	1131	97.1091	342.102	1.81675	phospho-2-dehydro-3-deoxyheptonate aldolase	5e-05
CC1G_07128	495744	549	56.4679	128.706	1.18858	hypothetical protein	5e-05
CC1G_14981	467336	2721	2.10441	7.23501	1.78158	DNA mismatch repair protein Msh5	5e-05
CC1G_07138	392815	999	2.51024	21.9397	3.12765	hypothetical protein	5e-05
CC1G_07167	444029	1110	132.934	47.3689	-1.48869	Cu/Zn superoxide dismutase	5e-05
CC1G_07171	467377	1275	16.9474	35.3045	1.05879	quinone oxidoreductase	5e-05
CC1G_07198	392967	973	7.03281	14.3561	1.02949	hypothetical protein	5e-05
CC1G_05652	482772	1265	7.75156	0.586749	-3.72367	TKL/TKL-ccin protein kinase	0.00035
CC1G_10354	444086	898	2920.21	1121.35	-1.38083	hypothetical protein	5e-05
CC1G_14751	503887	2514	4.32501	1.61498	-1.42119	other/FunK1 protein kinase	5e-05
CC1G_15472	434032	390	80.2462	194.868	1.27999	hypothetical protein	5e-05
CC1G_12603	147126	899	41.8883	88.9412	1.0863	hypothetical protein	5e-05
CC1G_04714	502321	1764	289.456	99.9003	-1.53478	hypothetical protein	5e-05
CC1G_04713	519767	2846	115.122	45.8195	-1.32913	NCP1	5e-05
CC1G_05581	491480	816	1.66983	66.1882	5.3088	hypothetical protein	0.0001
CC1G_14963	482834	891	4.00796	26.6407	2.73269	hypothetical protein	5e-05
CC1G_03359	148382	1545	5.36153	12.8174	1.25739	hypothetical protein	5e-05
CC1G_03788	467535	1143	20.9575	43.4512	1.05193	hypothetical protein	5e-05
CC1G_03807	444242	2096	33.5818	8.19642	-2.03461	hypothetical protein	5e-05
CC1G_03828	495868	735	130.605	53.2409	-1.2946	hypothetical protein	5e-05
CC1G_03786	467533	1209	144.432	337.556	1.22474	chaperone dnaJ 3	5e-05
CC1G_03791	467538	912	21.8261	9.16642	-1.25162	hypothetical protein	5e-05
CC1G_03810	467558	849	23.9872	4.35387	-2.46189	hypothetical protein	5e-05
CC1G_03833	476850	1524	0.584897	40.4891	6.11321	hypothetical protein	0.0001
CC1G_08805	151067	2050	58.7776	26.2748	-1.16159	hypothetical protein	5e-05
CC1G_08807	456166	1125	38.2302	98.7256	1.36871	hypothetical protein	5e-05
CC1G_07746	482858	1097	2.53692	7.08294	1.48127	hypothetical protein	0.0001
CC1G_06106	546385	1555	3.77957	1.122	-1.75215	hypothetical protein	0.0001
CC1G_12282	408219	2032	1.67701	0.614305	-1.44886	hypothetical protein	0.0028
CC1G_12283	546392	1924	4.49493	0.849173	-2.40417	hypothetical protein	5e-05
CC1G_11243	444333	3332	8.02184	17.9737	1.16389	ankyrin containing protein	0.00075
CC1G_05614	444355	1084	14.8041	79.6928	2.42845	hypothetical protein	5e-05
CC1G_05610	520214	1090	1.38907	13.7406	3.30625	hypothetical protein	5e-05
CC1G_09783	444368	1510	97.1809	256.867	1.40228	hypothetical protein	5e-05
CC1G_11566	444370	1234	60.4922	29.6316	-1.02961	hypothetical protein	5e-05
CC1G_11562	502449	2013	7.56354	57.7003	2.93145	hypothetical protein	5e-05
CC1G_11560	408278	1495	164.106	81.3846	-1.0118	hypothetical protein	5e-05
CC1G_09616	152667	921	15.3855	1.21612	-3.66122	hypothetical protein	0.00035
CC1G_00411	411963	2181	39.887	79.9363	1.00293	meiotically up-regulated 71 protein	0.00385
CC1G_00373	355234	2694	18.8444	40.4018	1.10028	argonaute family member	5e-05
CC1G_00336	355506	1296	55.0262	119.03	1.11313	hypothetical protein	5e-05
CC1G_00269	493094	585	7.71277	2.00703	-1.94219	rheb small monomeric GTPase RhbA	0.0082
CC1G_00200	444672	1271	27.2839	63.3075	1.21432	ribonucleotide reductase small subunit	5e-05
CC1G_00422	444409	1151	9.48875	4.55224	-1.05964	hypothetical protein	5e-05
CC1G_00420	537729	1479	7.58708	3.7054	-1.03392	hypothetical protein	5e-05
CC1G_00407	467706	747	56.1179	9.64745	-2.54024	hypothetical protein	5e-05
CC1G_00268	493095	2583	48.5662	24.0294	-1.01515	beta-mannosidase	5e-05
CC1G_00266	493098	1029	11.588	3.30671	-1.80916	hypothetical protein	5e-05
CC1G_00255	467871	1626	8.54019	3.9551	-1.11055	hypothetical protein	5e-05
CC1G_00241	467883	2667	3.09044	6.28586	1.0243	hypothetical protein	5e-05
CC1G_00201	386329	1634	260.966	68.808	-1.92321	ribonucleotide reductase small subunit	5e-05
CC1G_01656	363001	2265	23.4696	56.5897	1.26975	hypothetical protein	5e-05
CC1G_01654	540499	2047	11.4107	4.5235	-1.33488	hypothetical protein	5e-05
CC1G_01642	162486	1480	3.38971	1.07692	-1.65425	hypothetical protein	0.00085
CC1G_09431	363038	1665	6.85427	435.629	5.98995	cytochrome P450 78A3p	5e-05
CC1G_09430	476867	1064	2.13147	11.1139	2.38245	sirtuin	5e-05
CC1G_09424	521062	2394	4.79367	1.18366	-2.01788	hypothetical protein	5e-05
CC1G_09412	393199	2417	11.7008	3.84434	-1.6058	cell division cycle 20 family protein	5e-05
CC1G_09404	467961	1650	83.3013	16.3353	-2.35034	hypothetical protein	5e-05
CC1G_01661	161999	3547	15.831	35.6384	1.17068	hypothetical protein	5e-05
CC1G_01648	467979	756	23.2397	5.02385	-2.20973	G-X-X-X-Q-X-W domain-containing protein	5e-05
CC1G_08981	163161	1582	3.83029	37.4994	3.29134	hypothetical protein	5e-05
CC1G_08982	546454	1688	23.5002	7.40486	-1.66613	hypothetical protein	5e-05
CC1G_08439	408364	1672	0.422929	12.6565	4.90332	PKL/CAK/Fmp29-like protein kinase subdomain-containing protein	0.0001
CC1G_15404	338033	300	65.9636	138.335	1.06842	hypothetical protein	0.01465
CC1G_08445	163332	973	1.36952	4.75165	1.79475	hypothetical protein	0.00735
CC1G_11474	379954	3420	4.37534	1.10578	-1.98433	DNA replication helicase dna2	5e-05
CC1G_06022	482968	1187	9.43809	4.684	-1.01075	hypothetical protein	0.00015
CC1G_06019	502564	1602	3.58499	1.1575	-1.63095	laccase 5	0.0003
CC1G_01617	164203	2519	26.2384	10.8958	-1.26791	hypothetical protein	5e-05
CC1G_01618	444850	1350	384.049	82.9416	-2.21112	alcohol dehydrogenase superfamily protein	5e-05
CC1G_01619	502573	1521	2.07818	9.19559	2.14562	cytochrome P450	5e-05
CC1G_01623	502577	1275	123.887	248.035	1.00152	hypothetical protein	5e-05
CC1G_02181	468107	330	27.9247	284.203	3.34731	CoH1	0.0007
CC1G_02185	468111	333	132.666	8.0491	-4.04283	CoH2	0.00265
CC1G_02204	495987	2640	655.052	289.341	-1.17884	glycogen phosphorylase	5e-05
CC1G_03011	444937	1135	27.0543	77.4294	1.51703	hypothetical protein	5e-05
CC1G_15022	521489	1888	10.0878	4.31128	-1.22643	hypothetical protein	5e-05
CC1G_03009	468140	3273	23.775	61.8338	1.37895	nonribosomal peptide synthetase 12	5e-05
CC1G_06532	502586	4191	12.2175	121.57	3.31477	ATP-dependent bile acid permease	5e-05
CC1G_07781	468158	1062	3.63945	58.8005	4.01403	hypothetical protein	5e-05
CC1G_07780	434532	2472	6.16277	23.9238	1.95679	hypothetical protein	5e-05
CC1G_11724	546523	1888	1.99224	0.91057	-1.12955	hypothetical protein	0.0034
CC1G_15399	456684	3480	4.70124	1.30319	-1.851	histone-lysine N-methyltransferase	5e-05
CC1G_12302	491685	3584	2.24958	0.86211	-1.38371	hypothetical protein	5e-05
CC1G_12313	502619	1536	1.88796	0.476881	-1.98512	hypothetical protein	0.0142
CC1G_15401	380181	1626	6.0604	1.9327	-1.64879	hypothetical protein	5e-05
CC1G_11524	468204	999	48.4349	130.022	1.42464	lipid phosphate phosphatase 1	5e-05
CC1G_12455	408655	958	0.656406	2.05208	1.64443	hypothetical protein	0.01865
CC1G_12461	445027	1190	1.40733	17.0564	3.59928	hypothetical protein	5e-05
CC1G_12459	434649	1027	21.2962	70.6952	1.73102	hypothetical protein	5e-05
CC1G_12458	445030	1204	1.43645	6.44957	2.16669	hypothetical protein	5e-05
CC1G_12454	445037	1097	42.9917	246.32	2.5184	hypothetical protein	5e-05
CC1G_08398	468224	1554	2.4415	8.73381	1.83884	hypothetical protein	5e-05
CC1G_04790	445063	980	117.306	7.69627	-3.92997	hypothetical protein	5e-05
CC1G_04786	363282	1515	12.9718	5.94977	-1.12447	hypothetical protein	5e-05
CC1G_04783	476967	1942	0.48467	1.97016	2.02323	hypothetical protein	0.0038
CC1G_04779	168487	2619	11.8194	37.466	1.66442	hypothetical protein	5e-05
CC1G_04763	476986	2083	3.41353	220.26	6.0118	hypothetical protein	5e-05
CC1G_04762	393477	1915	13.5313	83.3632	2.62311	hypothetical protein	5e-05
CC1G_04735	445136	1965	7.69142	129.537	4.07397	hypothetical protein	5e-05
CC1G_04788	363313	2898	32.2722	79.8715	1.30739	QDE2 protein	5e-05
CC1G_04778	445079	3160	73.5917	35.285	-1.06049	hypothetical protein	5e-05
CC1G_15792	363228	906	1.95714	10.2895	2.39435	alpha/beta hydrolase domain-containing protein	0.00025
CC1G_04751	496042	1989	5.88646	19.2847	1.71198	hypothetical protein	5e-05
CC1G_04736	169515	2178	8.86653	23.8977	1.43043	purine transporter	5e-05
CC1G_04734	419688	1166	1165.76	108.924	-3.41988	hypothetical protein	5e-05
CC1G_04730	468305	612	26.5882	5.19146	-2.35657	Cys 2 peroxiredoxin	0.0001
CC1G_10192	169822	2220	56.5243	14.6715	-1.94585	glucan 1,3-beta-glucosidase	5e-05
CC1G_10189	445156	601	211.273	39.3072	-2.42624	hypothetical protein	5e-05
CC1G_10188	380326	348	147.413	22.1703	-2.73317	hypothetical protein	0.0021
CC1G_10193	380322	2703	92.3256	36.0221	-1.35785	hypothetical protein	5e-05
CC1G_07432	434732	2450	2.69044	1.21003	-1.1528	other/FunK1 protein kinase	0.00015
CC1G_02394	502698	2748	2.06729	7.67359	1.89216	hypothetical protein	5e-05
CC1G_07461	170517	1013	19.028	173.132	3.18568	hypothetical protein	5e-05
CC1G_07466	456820	750	8.61082	55.3319	2.68389	hypothetical protein	5e-05
CC1G_15137	502718	2049	1.67283	0.835915	-1.00086	other/FunK1 protein kinase	0.00605
CC1G_12389	445202	1374	17.6283	5.74127	-1.61845	hypothetical protein	5e-05
CC1G_12391	456826	1752	2.68451	1.2362	-1.11874	O-methylsterigmatocystin oxidoreductase	0.00175
CC1G_11787	434842	1530	0.33261	6.82466	4.35885	hypothetical protein	0.0026
CC1G_11784	408843	718	3.62887	213.74	5.8802	hypothetical protein	5e-05
CC1G_11778	502742	408	277.413	42.7761	-2.69716	hypothetical protein	5e-05
CC1G_11783	408845	1659	121.208	33.1873	-1.86879	oxidoreductase	5e-05
CC1G_08083	468371	1449	6.29754	1.39371	-2.17586	hypothetical protein	5e-05
CC1G_07915	445275	2153	6.06675	1.8961	-1.67788	hypothetical protein	5e-05
CC1G_07918	419716	349	356.106	824.089	1.21049	hypothetical protein	5e-05
CC1G_14729	522143	1044	2.09153	9.80297	2.22866	hypothetical protein	5e-05
CC1G_12998	522245	1387	8.39118	2.90877	-1.52846	hypothetical protein	5e-05
CC1G_11016	480302	1170	1.41432	14.2833	3.33614	hypothetical protein	5e-05
CC1G_07928	445317	979	10.5998	78.3834	2.88651	hypothetical protein	5e-05
CC1G_07927	445318	936	5.0177	74.7376	3.89674	hypothetical protein	5e-05
CC1G_07924	445322	1130	1.4221	3.17419	1.15837	hypothetical protein	0.0064
CC1G_12140	540661	2011	2.18608	0.448751	-2.28436	hypothetical protein	0.00165
CC1G_12151	393662	2590	2.07906	4.3427	1.06266	other/FunK1 protein kinase	5e-05
CC1G_07448	173502	4090	14.4079	4.78076	-1.59155	DNA helicase	5e-05
CC1G_07449	502804	1368	4.26682	1.00277	-2.08917	hypothetical protein	0.0005
CC1G_07290	445411	1247	194.031	408.348	1.07351	dicarboxylic acid transporter	5e-05
CC1G_07459	468502	726	34.7806	213.262	2.61628	hypothetical protein	5e-05
CC1G_09854	380734	942	20.4122	64.3184	1.6558	hypothetical protein	5e-05
CC1G_07665	363571	1512	96.6751	269.14	1.47714	RNAse L inhibitor-type ATP binding cassette protein	5e-05
CC1G_07657	175000	4177	22.7134	10.9861	-1.04786	DNA mismatch repair protein msh6	5e-05
CC1G_07655	457022	1749	16.9397	6.57565	-1.3652	hypothetical protein	5e-05
CC1G_07644	496145	1569	833.235	325.592	-1.35566	hexose transporter	5e-05
CC1G_07635	363541	465	13.7081	40.0621	1.54721	hypothetical protein	0.00525
CC1G_07624	445501	1077	1.90498	4.12717	1.11538	hypothetical protein	0.0103
CC1G_07664	477080	1575	1.79688	0.583082	-1.62372	hypothetical protein	0.0131
CC1G_07659	457019	1830	73.4815	172.651	1.2324	hypothetical protein	5e-05
CC1G_07640	363625	408	413.91	65.0953	-2.66869	histone H2A	5e-05
CC1G_12854	435066	1928	96.8321	38.2395	-1.34042	metallo-beta-lactamase	5e-05
CC1G_12851	409075	867	74.2643	31.2877	-1.24707	DUF1264 domain-containing protein	5e-05
CC1G_00803	380877	3900	12.7469	5.85213	-1.12311	hypothetical protein	5e-05
CC1G_08833	445594	2530	7.33626	3.14393	-1.22248	other/CDC7 protein kinase	5e-05
CC1G_09225	178147	1371	104.544	210.336	1.00859	hypothetical protein	0.0011
CC1G_09235	178424	1838	819.581	63.0836	-3.69955	hypothetical protein	5e-05
CC1G_09236	496196	1770	1.72648	0.57055	-1.59741	hypothetical protein	0.00555
CC1G_09238	457157	1371	38.823	1.43307	-4.75973	phosphatidylserine decarboxylase	5e-05
CC1G_09240	178286	1762	3077.27	694.732	-2.14712	phosphatidylserine decarboxylase	5e-05
CC1G_09241	496199	1350	27.987	122.544	2.13047	phosphatidylserine decarboxylase	5e-05
CC1G_09242	468688	2154	4.67417	1.12926	-2.04933	hypothetical protein	5e-05
CC1G_09243	468689	2016	6.24924	1.93838	-1.68883	hypothetical protein	5e-05
CC1G_12362	468709	3333	6.40613	18.883	1.55956	ankyrin repeat domain-containing protein 50	5e-05
CC1G_12363	523102	469	7.682	31.4506	2.03353	hypothetical protein	0.0011
CC1G_09214	363733	1809	1.81195	0.370974	-2.28815	hypothetical protein	0.0071
CC1G_09217	468666	1908	13.6531	1.74735	-2.96599	extracellular elastinolytic metalloproteinase	5e-05
CC1G_09226	445635	821	278.426	883.611	1.66612	hypothetical protein	5e-05
CC1G_09229	540743	1127	3.86186	0.984104	-1.97241	hypothetical protein	0.0046
CC1G_09237	468685	1317	6.04051	0.520095	-3.53782	phosphatidylserine decarboxylase	0.0039
CC1G_09248	477156	1009	39.997	13.7511	-1.54034	hypothetical protein	5e-05
CC1G_12358	363728	1152	19.5045	41.9004	1.10316	hypothetical protein	5e-05
CC1G_04074	468714	1332	7.07713	19.1289	1.43452	high affinity methionine permease	5e-05
CC1G_04077	445686	600	21.4489	7.51377	-1.5133	hypothetical protein	5e-05
CC1G_04080	502944	411	150.388	26.1204	-2.52544	hypothetical protein	5e-05
CC1G_04230	380995	1617	17.9966	5.67892	-1.66403	kinesin heavy chain	5e-05
CC1G_04168	381022	1140	9.01258	2.33103	-1.95097	acetyl xylan esterase	5e-05
CC1G_11666	381055	1653	4.30067	24.1913	2.49186	hypothetical protein	5e-05
CC1G_10244	445716	1635	6.66868	2.80277	-1.25055	hypothetical protein	5e-05
CC1G_15483	523274	1946	1.96012	27.5071	3.81079	hypothetical protein	5e-05
CC1G_04069	502989	1377	24.13	3.75401	-2.68432	hypothetical protein	5e-05
CC1G_13050	435301	1273	2.86736	5.76981	1.0088	actin alpha 1 skeletal muscle protein	0.0007
CC1G_13054	180289	1589	20.2815	7.47284	-1.44043	hypothetical protein	5e-05
CC1G_13049	502995	792	2.1146	14.7822	2.8054	hypothetical protein	5e-05
CC1G_12848	445752	1834	210.359	58.7832	-1.83938	hexose transporter	5e-05
CC1G_05766	503008	273	786.848	304.563	-1.36934	histone H3	5e-05
CC1G_13972	182362	884	63.0066	27.261	-1.20866	hypothetical protein	5e-05
CC1G_03913	182474	2601	24.9724	7.35129	-1.76426	tyrosine phosphatase	5e-05
CC1G_03881	363888	342	466.36	970.089	1.05667	eukaryotic translation initiation factor 1	5e-05
CC1G_03884	420143	1210	2.39501	0.667329	-1.84356	hypothetical protein	0.0199
CC1G_08277	546855	1362	2.32987	0.181759	-3.68015	cellobiohydrolase II-I	0.00925
CC1G_11805	546868	1283	683.294	30.7222	-4.47515	hypothetical protein	5e-05
CC1G_02623	503053	2607	18.0418	6.76404	-1.41538	hypothetical protein	5e-05
CC1G_07471	468897	2265	24.2497	7.97211	-1.60494	hypothetical protein	5e-05
CC1G_07472	546877	2411	0.869279	3.04575	1.80891	hypothetical protein	5e-05
CC1G_07474	445883	1608	97.5896	35.4138	-1.46242	hypothetical protein	5e-05
CC1G_05681	468955	978	35.4254	84.9745	1.26225	cytosolic Fe-S cluster assembling factor NBP35	5e-05
CC1G_05707	445964	666	52.6926	20.6726	-1.34988	hypothetical protein	5e-05
CC1G_05665	445918	1534	90.9756	302.918	1.73537	hypothetical protein	5e-05
CC1G_05673	394172	1212	7.44419	2.23485	-1.73593	hypothetical protein	5e-05
CC1G_05689	496322	2739	15.7855	103.24	2.70933	cytoplasmic protein	5e-05
CC1G_05699	364090	2550	23.3591	10.9462	-1.09355	condensin complex component cnd2	5e-05
CC1G_05969	381376	648	239.186	533.424	1.15715	hypothetical protein	5e-05
CC1G_05967	546898	4940	2.34002	5.01055	1.09845	hypothetical protein	5e-05
CC1G_12510	523818	1907	62.5126	412.428	2.72192	carotenoid ester lipase	5e-05
CC1G_12509	445992	965	3.68517	9.35495	1.344	hypothetical protein	0.0001
CC1G_05602	409498	3691	15.4976	7.30709	-1.08467	hypothetical protein	5e-05
CC1G_05598	435498	2058	11.0897	3.32122	-1.73944	hypothetical protein	5e-05
CC1G_14779	446025	1807	15.5449	442.503	4.83118	hypothetical protein	5e-05
CC1G_06947	446046	2918	2.28789	0.961002	-1.25141	copper amine oxidase	5e-05
CC1G_06923	469096	2232	23.3179	9.40527	-1.3099	hypothetical protein	5e-05
CC1G_06912	394357	832	36.9153	14.4431	-1.35384	hypothetical protein	5e-05
CC1G_06908	496393	1302	2.26871	1.04889	-1.113	hypothetical protein	0.00995
CC1G_15547	496348	2526	47.7964	100.34	1.06992	hypothetical protein	5e-05
CC1G_06941	186828	1989	16.3969	5.63583	-1.54072	dynein intermediate chain	0.00105
CC1G_06937	469081	669	10.4997	3.9455	-1.41206	hypothetical protein	0.01365
CC1G_06913	496388	1023	5.02114	1.74451	-1.52519	hypothetical protein	0.0024
CC1G_09782	381558	1575	225.496	79.1076	-1.51121	cytochrome P450	5e-05
CC1G_09786	492040	1693	5.58618	1.51622	-1.88138	hypothetical protein	5e-05
CC1G_02784	188422	2653	60.1376	29.9557	-1.00544	hypothetical protein	5e-05
CC1G_02782	446152	1505	3.54382	1.70612	-1.05458	hypothetical protein	0.00195
CC1G_02779	435608	625	62.727	22.3911	-1.48616	hypothetical protein	5e-05
CC1G_12490	496395	2319	123.053	37.6735	-1.70766	OPT oligopeptide transporter	5e-05
CC1G_12488	188631	1964	4.32397	1.25922	-1.77983	hypothetical protein	5e-05
CC1G_15806	188589	3944	16.6778	6.61651	-1.33379	alpha-aminoadipic semialdehyde synthase	5e-05
CC1G_12331	496411	1440	22.297	5.3598	-2.0566	endo-1,4-beta-glucanase	5e-05
CC1G_04814	364293	993	4.60252	1.64753	-1.48212	hypothetical protein	0.00965
CC1G_12491	394368	3819	23.6457	8.85894	-1.41637	nuclear condensin complex protein	5e-05
CC1G_15804	394394	1000	5.49955	1.53505	-1.84103	hypothetical protein	0.00225
CC1G_15803	540942	3252	7.01439	17.6242	1.32916	hypothetical protein	5e-05
CC1G_12336	188782	1665	6.62639	2.12736	-1.63916	hypothetical protein	5e-05
CC1G_04798	496435	5571	32.841	11.1014	-1.56476	hypothetical protein	5e-05
CC1G_04797	364305	1398	16.5623	5.91081	-1.48647	cytochrome P450	5e-05
CC1G_14543	446208	2076	27.1532	11.1676	-1.2818	cytochrome P450 monooxygenase pc-2	5e-05
CC1G_06654	381690	864	3.46819	21.6018	2.6389	hypothetical protein	5e-05
CC1G_10802	503234	2040	0.666764	1.84077	1.46506	ABC transporter	0.00545
CC1G_10863	546971	970	38.8028	16.076	-1.27125	hypothetical protein	5e-05
CC1G_04334	189663	1081	18.5525	2.63174	-2.81752	hypothetical protein	5e-05
CC1G_04330	469241	2472	2.36021	7.44514	1.65738	hypothetical protein	5e-05
CC1G_10812	381746	759	8.89438	34.8936	1.972	B2-aldehyde-forming enzyme	5e-05
CC1G_01923	493218	1068	21.6564	49.2587	1.18559	aryl-alcohol dehydrogenase	5e-05
CC1G_01883	538026	1301	9.83882	37.6472	1.93598	hypothetical protein	5e-05
CC1G_14159	469398	585	72.1617	190.781	1.40262	hypothetical protein	5e-05
CC1G_12099	446412	1398	240.562	798.489	1.73086	alternative cyclin Pcl12	5e-05
CC1G_12093	524741	1387	6.9165	59.7998	3.11203	glycosyl hydrolase family 16	5e-05
CC1G_12088	355726	621	7.40441	18.2496	1.30141	hypothetical protein	0.0033
CC1G_12086	195080	1990	177.268	38.7226	-2.19469	sodium:inorganic phosphate symporter	5e-05
CC1G_09336	412954	1308	399.901	195.22	-1.03454	basic leucine zipper and W2 domain-containing protein 2	5e-05
CC1G_01963	446272	1887	31.3885	68.4032	1.12383	hypothetical protein	5e-05
CC1G_01962	355613	2061	156.127	66.9421	-1.22173	hypothetical protein	5e-05
CC1G_01961	493180	3333	23.6731	6.12445	-1.9506	other/WEE protein kinase	5e-05
CC1G_01947	355621	1500	92.654	22.6103	-2.03488	hypothetical protein	5e-05
CC1G_01909	446335	1195	52.5427	172.302	1.71338	hypothetical protein	5e-05
CC1G_01903	355684	942	275.341	137.313	-1.00375	hypothetical protein	5e-05
CC1G_01879	193545	2877	7.40178	1.42099	-2.38097	hypothetical protein	5e-05
CC1G_11832	446391	1614	33.2694	13.1672	-1.33725	hypothetical protein	5e-05
CC1G_14164	412828	1096	7.96151	24.1093	1.59847	hypothetical protein	5e-05
CC1G_14161	386671	2667	46.7477	287.151	2.61884	phenylalanine ammonium lyase	5e-05
CC1G_14150	493329	1167	9.88364	27.5003	1.47633	hypothetical protein	5e-05
CC1G_12164	469497	786	31.7787	84.3553	1.40842	hypothetical protein	5e-05
CC1G_08824	486833	1286	35.1512	75.4144	1.10127	hypothetical protein	5e-05
CC1G_12058	469490	1494	6.03485	15.2863	1.34085	hypothetical protein	5e-05
CC1G_04363	394549	1514	1.92757	0.592649	-1.70153	hypothetical protein	0.00465
CC1G_02885	446554	596	48.1276	108.453	1.17213	hypothetical protein	5e-05
CC1G_10894	492096	1880	4.42418	1.41146	-1.64822	hypothetical protein	5e-05
CC1G_10893	446585	2015	13.2345	198.793	3.90889	beta-lactamase	5e-05
CC1G_04051	381870	1158	35.9919	3.79637	-3.24498	glycosyl hydrolase family 16	5e-05
CC1G_08118	446592	1121	63.9467	30.6264	-1.06209	hypothetical protein	5e-05
CC1G_06114	409790	761	59.2153	24.108	-1.29646	hypothetical protein	5e-05
CC1G_15120	547025	2315	7.13463	3.03667	-1.23235	other/FunK1 protein kinase	5e-05
CC1G_10637	469603	1953	0.668412	2.90331	2.11889	hypothetical protein	0.00035
CC1G_14708	477452	4996	1.9425	4.12904	1.08789	hypothetical protein	5e-05
CC1G_08181	496528	591	36.9029	155.114	2.07152	inosine triphosphate pyrophosphatase	5e-05
CC1G_08161	364517	1521	53.6711	140.404	1.38736	hypothetical protein	5e-05
CC1G_10656	496499	849	19.5971	46.9894	1.2617	hypothetical protein	5e-05
CC1G_10305	199884	1310	39.9197	19.4073	-1.0405	hypothetical protein	5e-05
CC1G_05972	409847	1993	19.4996	6.5738	-1.56864	laccase 4	5e-05
CC1G_10009	457999	1107	10.3685	4.7883	-1.11462	hypothetical protein	0.0001
CC1G_07683	469668	981	12.9082	45.7908	1.82677	hypothetical protein	5e-05
CC1G_10310	200537	1851	21.4815	8.50342	-1.33698	hypothetical protein	5e-05
CC1G_03540	496556	1014	64.1928	163.5	1.34881	haloacid dehalogenase	5e-05
CC1G_03562	201523	1713	7.86298	85.4329	3.44164	cytochrome P450 98A3	5e-05
CC1G_03564	420898	1836	3.57795	115.253	5.00953	cytochrome P450	5e-05
CC1G_03565	541099	3182	22.17	9.54269	-1.21614	dehydrogenase E1 and transketolase domain-containing protein 1	5e-05
CC1G_03577	420930	2314	1.49043	49.787	5.06197	multidrug resistance protein 4	5e-05
CC1G_03578	446840	1131	25.3847	651.583	4.68192	ThiJ/PfpI	5e-05
CC1G_03585	446846	640	56.8529	15.1501	-1.9079	fungal mating-type pheromone	5e-05
CC1G_03563	394772	1112	0.531245	92.4873	7.44374	hypothetical protein	0.0026
CC1G_03568	469722	1830	1.00949	2.38944	1.24305	metalloreductase	0.0044
CC1G_03571	469725	1407	21.5323	9.17354	-1.23095	other/BUB protein kinase	5e-05
CC1G_08456	446878	1720	83.1465	253.892	1.61049	hypothetical protein	5e-05
CC1G_04174	382197	753	17.8599	6.2505	-1.51468	hypothetical protein	5e-05
CC1G_04175	435970	2535	23.6813	7.49274	-1.66018	other/NEK protein kinase	5e-05
CC1G_04160	469769	2055	7.96907	18.3447	1.20288	hypothetical protein	5e-05
CC1G_02096	469792	1521	1.24823	2.71754	1.12242	hypothetical protein	0.00245
CC1G_02106	421013	954	4.66329	0.291016	-4.00218	hypothetical protein	0.00355
CC1G_02118	541145	1156	0.858396	85.2739	6.63432	hypothetical protein	0.0001
CC1G_02122	421037	1015	14.7327	35.295	1.26045	GTP-binding protein ypt7	5e-05
CC1G_02130	446952	462	28.6034	8.54854	-1.74244	fungal mating-type pheromone	0.0193
CC1G_15340	477568	728	36.5237	16.9637	-1.10638	fungal mating-type pheromone	5e-05
CC1G_02084	364901	1305	72.5796	395.424	2.44576	hypothetical protein	5e-05
CC1G_02095	469791	960	394.491	178.591	-1.14333	hypothetical protein	5e-05
CC1G_02101	446922	2635	9.32853	3.35244	-1.47644	other/FunK1 protein kinase	5e-05
CC1G_02132	446955	435	8.20986	22.4649	1.45224	pheromone Phb2.2 B44	0.0153
CC1G_07494	382241	978	9.38893	3.93603	-1.25422	hypothetical protein	0.0003
CC1G_03954	547121	1331	201.173	784.179	1.96275	selenocysteine lyase	5e-05
CC1G_05608	446988	3773	47.0676	95.0644	1.01417	hypothetical protein	5e-05
CC1G_13246	436043	821	9.31664	55.5761	2.57658	hypothetical protein	5e-05
CC1G_05535	447008	1163	52.5052	21.6068	-1.28098	hypothetical protein	5e-05
CC1G_11327	541188	1232	64.2034	27.8223	-1.20641	hypothetical protein	5e-05
CC1G_11338	487004	1762	1.98331	5.04642	1.34735	hypothetical protein	5e-05
CC1G_05540	364931	657	49.1271	122.693	1.32046	hypothetical protein	5e-05
CC1G_11340	364950	2616	32.5966	102.377	1.65109	hypothetical protein	5e-05
CC1G_11341	205173	1195	55.7276	25.2847	-1.14013	hypothetical protein	5e-05
CC1G_03134	447085	431	67.3983	14.053	-2.26183	hypothetical protein	0.0003
CC1G_15555	382440	2010	8.54586	3.42241	-1.32021	NA	5e-05
CC1G_10495	206012	1455	1.73946	48.5927	4.80403	hypothetical protein	5e-05
CC1G_05776	541226	1128	1708.86	593.722	-1.52517	ycaC protein	5e-05
CC1G_05791	206554	1402	7.12015	1.78445	-1.99643	hypothetical protein	5e-05
CC1G_05798	447153	1824	24.8073	6.9945	-1.82647	hypothetical protein	5e-05
CC1G_15375	470000	438	11.1349	35.1856	1.65989	hypothetical protein	0.0035
CC1G_05781	421232	2106	136.671	68.3045	-1.00066	OrdA protein	5e-05
CC1G_05799	365060	756	2.56678	6.45891	1.33133	metalloprotease	0.01485
CC1G_05803	421286	1705	9.57494	4.27973	-1.16174	enoyl-CoA hydratase/isomerase	5e-05
CC1G_05806	447162	2930	26.3109	5.51938	-2.25308	hypothetical protein	5e-05
CC1G_05372	410146	3041	23.5277	5.95832	-1.98138	kinesin	5e-05
CC1G_02426	458409	927	16.1617	33.6157	1.05656	hypothetical protein	5e-05
CC1G_02440	470109	453	5.01179	27.2331	2.44196	hypothetical protein	0.00275
CC1G_02445	365197	621	30.2801	3.74095	-3.0169	hypothetical protein	0.00015
CC1G_02465	365195	2691	109.835	53.8545	-1.02821	potassium:hydrogen antiporter	5e-05
CC1G_02425	447218	1924	27.8956	60.2193	1.11019	hypothetical protein	5e-05
CC1G_02427	421305	1910	4.17386	1.48427	-1.49163	hypothetical protein	5e-05
CC1G_02432	365194	1653	8.65853	21.466	1.30986	cytochrome P450	5e-05
CC1G_02433	365259	2493	54.35	25.7105	-1.07992	hypothetical protein	5e-05
CC1G_02447	395233	1556	29.6423	59.3225	1.00092	hypothetical protein	5e-05
CC1G_02460	421367	469	85.4715	14.8211	-2.52779	hypothetical protein	5e-05
CC1G_05397	447294	1530	8.50368	22.7035	1.41675	hypothetical protein	5e-05
CC1G_05398	503618	1014	10.5172	25.0827	1.25395	3-methyl-2-oxobutanoate hydroxymethyltransferase PanB	5e-05
CC1G_10759	547204	1564	10.5882	2.43535	-2.12025	hypothetical protein	5e-05
CC1G_05052	447350	1820	19.8384	208.314	3.3924	trichothecene 3-O-acetyltransferase	5e-05
CC1G_05048	365330	1854	15.3656	7.01125	-1.13196	cyclopropane-fatty-acyl-phospholipid synthase	5e-05
CC1G_05068	447320	3609	19.9763	7.22059	-1.4681	hypothetical protein	5e-05
CC1G_05040	541323	5626	16.3104	3.37571	-2.27253	hypothetical protein	5e-05
CC1G_05039	496836	423	6.20332	22.6187	1.8664	hypothetical protein	0.0103
CC1G_06039	503649	726	124.438	23.7774	-2.38776	hypothetical protein	5e-05
CC1G_00442	421528	1898	1.86307	64.7341	5.11877	cytoplasmic protein	5e-05
CC1G_00467	365535	453	67.4918	143.464	1.08791	hypothetical protein	5e-05
CC1G_15788	365455	1824	5.16596	15.2395	1.56071	multidrug resistance protein	5e-05
CC1G_05845	547248	2026	10.0469	2.35014	-2.09593	hypothetical protein	5e-05
CC1G_08382	410350	437	8.29673	124.228	3.9043	hypothetical protein	0.0027
CC1G_01353	365598	2508	18.7079	5.94647	-1.65355	other/Haspin protein kinase	5e-05
CC1G_01350	365708	1704	5.38606	2.27631	-1.24254	hypothetical protein	5e-05
CC1G_01321	365725	2019	32.0569	11.744	-1.44871	hypothetical protein	5e-05
CC1G_01310	487223	1646	0.943163	2.5049	1.40917	FAD binding domain-containing protein	0.001
CC1G_10239	547264	1799	71.111	34.7727	-1.03212	hypothetical protein	5e-05
CC1G_10470	527180	1433	1.85801	11.8171	2.66904	hypothetical protein	5e-05
CC1G_04909	383035	4266	4.21827	1.47867	-1.51236	hypothetical protein	5e-05
CC1G_02954	356192	810	12.9152	6.21076	-1.05623	hypothetical protein	0.0005
CC1G_02961	447658	4679	23.1681	10.1724	-1.18748	hypothetical protein	5e-05
CC1G_02962	458752	1887	212.942	83.8017	-1.34541	hypothetical protein	5e-05
CC1G_15012	413057	2407	138.397	351.354	1.34411	cytochrome P450 oxidoreductase	5e-05
CC1G_02953	356207	714	36.8526	18.0052	-1.03335	hypothetical protein	5e-05
CC1G_05906	356391	2388	66.8031	192.734	1.52863	hypothetical protein	5e-05
CC1G_08376	218869	2120	4.84069	13.0081	1.42613	other/FunK1 protein kinase	5e-05
CC1G_08364	470565	1587	5.64156	29.821	2.40216	lanosterol 14-alpha-demethylase	5e-05
CC1G_08355	493449	1485	28.467	6.75352	-2.07558	hypothetical protein	5e-05
CC1G_08350	219393	1171	28.6375	2.70553	-3.40392	hypothetical protein	5e-05
CC1G_08348	356223	2991	12.0596	4.45579	-1.43643	hypothetical protein	5e-05
CC1G_08667	365852	2109	10.2638	22.4731	1.13064	hypothetical protein	5e-05
CC1G_08669	421842	1767	11.5065	4.98609	-1.20647	nuclear protein localization	5e-05
CC1G_15528	470622	8568	5.70071	2.39595	-1.25054	hypothetical protein	5e-05
CC1G_08677	496981	627	29.2705	292.782	3.3223	hypothetical protein	5e-05
CC1G_08680	220737	2556	2.46139	228.224	6.53483	hypothetical protein	5e-05
CC1G_15533	470649	837	37.6383	6.58953	-2.51396	hypothetical protein	5e-05
CC1G_09024	447864	1690	55.9256	8.40696	-2.73385	hypothetical protein	5e-05
CC1G_07205	547282	680	32.6101	5.78956	-2.49379	hypothetical protein	5e-05
CC1G_09948	447878	3003	5.35491	0.89917	-2.5742	hypothetical protein	5e-05
CC1G_06262	470689	1602	37.0002	96.4573	1.38236	hypothetical protein	5e-05
CC1G_09946	447892	1234	510.102	243.633	-1.06608	hypothetical protein	5e-05
CC1G_11400	497032	768	15.8267	2.59385	-2.6092	hypothetical protein	5e-05
CC1G_09200	447953	622	12.7802	72.785	2.50973	hypothetical protein	5e-05
CC1G_09868	447960	1618	65.1223	175.041	1.42647	lipase	5e-05
CC1G_03149	477965	820	33.244	7.43555	-2.16058	hypothetical protein	5e-05
CC1G_03183	365997	1773	5.46089	1.35532	-2.01051	hypothetical protein	5e-05
CC1G_03185	448025	1690	30.4776	5.2855	-2.52764	hypothetical protein	5e-05
CC1G_03156	222923	1352	29.3024	2.68512	-3.44796	hypothetical protein	5e-05
CC1G_03158	395952	615	10.1322	167.44	4.04663	hypothetical protein	5e-05
CC1G_03170	223186	2256	47.1128	17.9573	-1.39155	phosphate transporter	5e-05
CC1G_07025	547302	2325	2.57527	1.14943	-1.16381	other/FunK1 protein kinase	0.0001
CC1G_14294	223672	920	4.31761	1.82885	-1.2393	hypothetical protein	0.0091
CC1G_11184	396082	1908	207.782	56.8441	-1.86999	hypothetical protein	5e-05
CC1G_13535	422163	1722	15.2576	34.6935	1.18514	DnaJ protein	5e-05
CC1G_12373	422178	1611	56.5058	127.729	1.17662	CRAL/TRIO domain-containing protein	5e-05
CC1G_11183	224349	1178	4.08368	1.31867	-1.63079	hypothetical protein	0.00475
CC1G_14751	456025	2283	4.28097	1.24805	-1.77826	other/FunK1 protein kinase	5e-05
CC1G_10865	470919	483	60.0331	13.0586	-2.20076	hypothetical protein	5e-05
CC1G_02245	448156	1170	925.96	163.838	-2.49868	hypothetical protein	5e-05
CC1G_10869	366259	2721	6.8593	1.92608	-1.8324	hypothetical protein	5e-05
CC1G_10848	541641	1290	20.0176	7.03543	-1.50856	hypothetical protein	5e-05
CC1G_02243	448158	973	1.76875	4.05894	1.19837	other/FunK1 protein kinase	0.01635
CC1G_08810	470942	1068	1.2098	3.71504	1.61861	hypothetical protein	0.00255
CC1G_03438	497197	2073	0.826168	3.35901	2.02353	hypothetical protein	5e-05
CC1G_03443	226837	1666	17.3455	6.6106	-1.39171	hypothetical protein	5e-05
CC1G_03463	448206	1874	36.6644	180.759	2.30161	mitochondrial alternative oxidase	5e-05
CC1G_03465	487439	2274	58.0263	142.863	1.29985	hypothetical protein	5e-05
CC1G_07808	383455	1716	2.57288	1.15605	-1.15418	hypothetical protein	0.00225
CC1G_06698	528682	1190	1.5665	472.429	8.23641	hypothetical protein	5e-05
CC1G_06697	487457	1642	28.5794	80.7409	1.49832	hypothetical protein	5e-05
CC1G_06672	448266	1714	11.7671	27.4457	1.22182	hypothetical protein	5e-05
CC1G_06686	487485	697	6.47419	0.631459	-3.35794	hypothetical protein	0.00325
CC1G_03964	497277	1020	27.7644	12.2342	-1.18232	hypothetical protein	5e-05
CC1G_03961	366562	678	88.3946	19.6732	-2.16773	hypothetical protein	5e-05
CC1G_06663	497255	2427	33.0666	73.414	1.15068	cytoplasmic protein	5e-05
CC1G_08955	228855	2245	23.913	10.1005	-1.24338	hypothetical protein	5e-05
CC1G_02793	383530	1023	5.97058	12.5846	1.07571	hypothetical protein	0.00855
CC1G_07856	459362	1164	3.90912	1.08894	-1.84391	Rds1 protein	0.00175
CC1G_11639	422611	942	17.4709	4.73871	-1.88239	hypothetical protein	5e-05
CC1G_07862	366605	1812	303.445	731.139	1.26871	alcohol oxidase AOX1	5e-05
CC1G_14347	383559	1416	0.366852	4.4101	3.58754	O-methylsterigmatocystin oxidoreductase	0.00435
CC1G_06397	471179	1518	29.0809	6.83402	-2.08926	cyclin	5e-05
CC1G_06391	497345	2118	18.4947	5.7546	-1.68433	hypothetical protein	5e-05
CC1G_06385	366692	2172	119.18	58.9346	-1.01595	hypothetical protein	5e-05
CC1G_13144	383623	2712	15.3678	6.56281	-1.22753	endopeptidase	5e-05
CC1G_10972	487583	1727	30.9517	5.70868	-2.43879	hypothetical protein	5e-05
CC1G_10979	497396	5856	63.031	28.3482	-1.1528	hypothetical protein	5e-05
CC1G_05213	459478	1203	12.2037	2.42605	-2.33064	glycosyl hydrolase family 88	5e-05
CC1G_05221	541864	3406	20.5461	4.60778	-2.15672	DNA mismatch repair protein MSH2	5e-05
CC1G_14217	493516	3168	7.18593	1.85109	-1.9568	RAD54B protein	5e-05
CC1G_14194	471416	1812	37.0639	116.689	1.65459	DUF323 domain-containing protein	5e-05
CC1G_07395	356637	1437	52.2822	19.1464	-1.44925	RCB1	5e-05
CC1G_07381	474563	2517	2.02244	0.677265	-1.5783	hypothetical protein	5e-05
CC1G_07365	471341	786	23.9721	53.4169	1.15594	hypothetical protein	5e-05
CC1G_14207	471361	2184	3.51827	160.127	5.50821	heat shock protein	5e-05
CC1G_02015	356538	3321	11.052	3.12964	-1.82025	hypothetical protein	5e-05
CC1G_02008	239049	947	88.0559	209.726	1.25201	hypothetical protein	5e-05
CC1G_02004	529780	2123	2.80829	0.821553	-1.77327	FAD binding domain-containing protein	5e-05
CC1G_14317	448707	2565	2.64681	0.864248	-1.61474	other/FunK1 protein kinase	5e-05
CC1G_02613	366941	1173	9.58378	68.9814	2.84754	hypothetical protein	5e-05
CC1G_02599	497434	1140	10.5368	2.51744	-2.06541	hypothetical protein	5e-05
CC1G_02606	459642	1002	10.1971	1.10032	-3.21217	glycosyl hydrolase family 16	0.0001
CC1G_02603	541880	1595	14.1663	1.64225	-3.10871	hypothetical protein	5e-05
CC1G_02591	240283	1229	128.732	47.9036	-1.42617	hypothetical protein	5e-05
CC1G_02590	471478	1191	1.09272	4.81414	2.13936	delta 12 fatty acid epoxygenase	0.0006
CC1G_02586	366954	1089	13.25	1.83933	-2.84874	hypothetical protein	5e-05
CC1G_02584	497447	1041	6.70553	1.35199	-2.31026	hypothetical protein	0.00025
CC1G_02580	459666	1209	108.493	230.62	1.08792	farnesyldiphosphatesynthetase	5e-05
CC1G_02572	240518	1853	33.0445	96.4271	1.54503	cystathionine gamma-lyase	5e-05
CC1G_15006	367102	561	1266.5	483.575	-1.38903	hypothetical protein	5e-05
CC1G_02900	448807	4138	29.9914	11.9819	-1.3237	CAMK/CAMKL/MARK protein kinase	5e-05
CC1G_02897	367057	2052	69.3629	23.1004	-1.58625	hypothetical protein	5e-05
CC1G_06632	243330	1330	22.0959	47.2993	1.09804	glutamine amidotransferase subunit pdxT	5e-05
CC1G_06638	497535	1158	28.868	100.97	1.80638	hypothetical protein	5e-05
CC1G_06639	397077	1121	151.886	304.376	1.00286	hypothetical protein	5e-05
CC1G_06640	497537	1689	40.2345	19.9568	-1.01155	hypothetical protein	5e-05
CC1G_11094	541950	1015	5.7856	1.77091	-1.70797	hypothetical protein	0.00055
CC1G_06633	397065	1180	9.80107	42.9553	2.13183	hypothetical protein	5e-05
CC1G_06634	497531	762	131.125	309.577	1.23935	hypothetical protein	5e-05
CC1G_02368	478454	1146	3.36978	10.7536	1.67409	hypothetical protein	5e-05
CC1G_02369	244667	1846	71.8466	33.3025	-1.10929	polysaccharide synthase Cps1p	5e-05
CC1G_02333	448884	3298	10.3915	3.50818	-1.5666	hypothetical protein	5e-05
CC1G_02341	423239	919	58.1531	8.06667	-2.84981	small heat shock protein	5e-05
CC1G_02345	530292	1961	9.59332	4.66552	-1.03999	malate synthase	5e-05
CC1G_07035	547387	2438	1.94422	0.679387	-1.51688	other/FunK1 protein kinase	0.0001
CC1G_13758	438848	912	17.2778	6.33461	-1.4476	hypothetical protein	5e-05
CC1G_00647	459848	1086	8.56148	38.617	2.1733	hypothetical protein	5e-05
CC1G_00645	367347	978	10.4929	256.464	4.61127	hypothetical protein	5e-05
CC1G_00632	245232	2374	34.1807	12.6379	-1.43543	HlyB/MsbA family ABC transporter	5e-05
CC1G_00628	397232	1348	1.84135	4.9809	1.43564	hypothetical protein	0.0003
CC1G_00622	497612	408	453.642	198.563	-1.19196	translation initiation inhibitor	5e-05
CC1G_00618	542051	1521	2.53504	0.821485	-1.6257	hypothetical protein	0.0025
CC1G_00612	497620	1038	38.3158	14.1365	-1.43851	hypothetical protein	5e-05
CC1G_13750	245968	669	2.12964	10.9932	2.36793	hypothetical protein	0.0059
CC1G_00609	367382	882	5.97924	42.9689	2.84526	hypothetical protein	5e-05
CC1G_13072	448984	700	849.753	29.8843	-4.82958	hypothetical protein	5e-05
CC1G_07601	471732	1947	32.4738	10.0519	-1.69181	hypothetical protein	5e-05
CC1G_07581	367485	645	41.4233	3.50093	-3.56463	hypothetical protein	5e-05
CC1G_07604	448997	4790	11.2143	126.616	3.49705	ABC transporter	5e-05
CC1G_14447	497637	366	20.7023	83.4768	2.01159	hypothetical protein	0.00385
CC1G_14446	471736	729	43.2673	119.847	1.46985	hypothetical protein	5e-05
CC1G_02648	367554	660	14.094	49.3625	1.80833	hypothetical protein	5e-05
CC1G_02642	423575	932	5.93174	25.4566	2.10151	hypothetical protein	5e-05
CC1G_02635	423589	1090	82.8804	28.67	-1.53149	hypothetical protein	0.0004
CC1G_02630	487841	2147	116.732	314.561	1.43014	sugar transporter	5e-05
CC1G_02669	497673	1446	18.3267	4.06354	-2.17314	hypothetical protein	5e-05
CC1G_02636	248409	1314	64.2165	17.0121	-1.91638	hypothetical protein	5e-05
CC1G_00910	460017	1860	18.1699	7.5288	-1.27106	hypothetical protein	5e-05
CC1G_00922	249370	2570	30.9661	11.5663	-1.42076	hypothetical protein	5e-05
CC1G_00931	249655	1906	11.5663	23.6502	1.03193	receptor	5e-05
CC1G_00938	449161	1265	21.0642	50.8547	1.27159	choline-phosphate cytidylyltransferase	5e-05
CC1G_08116	504146	915	62.6712	17.0943	-1.87429	hypothetical protein	5e-05
CC1G_00862	250685	659	17.6158	4.2759	-2.04257	DNA repair and recombination protein pif1	0.0002
CC1G_14827	250770	1364	6.39608	19.5811	1.6142	hypothetical protein	5e-05
CC1G_00877	471912	1044	22.4943	8.62903	-1.38229	DNA replication factor	5e-05
CC1G_00872	367776	6552	26.9094	11.3677	-1.24318	DNA repair protein rad8	5e-05
CC1G_00878	367840	1770	3.08192	23.1832	2.91117	hypothetical protein	5e-05
CC1G_11511	384105	1335	109.324	253.423	1.21294	glucuronyl hydrolase	5e-05
CC1G_09480	367957	453	77.6779	32.9219	-1.23845	hypothetical protein	0.00015
CC1G_09486	367919	1572	10.7081	3.14045	-1.76966	hypothetical protein	5e-05
CC1G_11263	449267	1346	6.41023	2.21329	-1.53418	hypothetical protein	5e-05
CC1G_09477	542232	2381	2.31361	0.895996	-1.36858	beta-glucosidase	5e-05
CC1G_11274	367951	1251	10.0332	23.9371	1.25447	hypothetical protein	5e-05
CC1G_00562	474705	4551	46.3462	441.699	3.25254	ABC-transporter	5e-05
CC1G_00517	357054	1254	11.6654	78.4727	2.74995	salicylate hydroxylase	5e-05
CC1G_00510	387721	1896	2.59776	9.79097	1.91418	hypothetical protein	5e-05
CC1G_06614	256103	482	44.1525	90.0781	1.02868	hypothetical protein	0.00015
CC1G_06608	414030	580	29.7812	181.024	2.6037	hypothetical protein	5e-05
CC1G_00563	413757	1547	1122.86	392.168	-1.51764	glycosyl hydrolase 53 domain-containing protein	5e-05
CC1G_00512	449390	1118	120.814	247.017	1.03182	hypothetical protein	5e-05
CC1G_00509	449397	493	8.93663	26.4281	1.56427	hypothetical protein	0.00335
CC1G_00499	472068	1125	41.7811	175.225	2.06829	hypothetical protein	5e-05
CC1G_03936	368135	1554	37.6401	152.65	2.01988	laccase 2	5e-05
CC1G_10435	497919	1098	0.841085	3.33614	1.98786	hypothetical protein	0.01235
CC1G_03940	449549	1933	27.5438	9.13647	-1.59202	laccase	5e-05
CC1G_03937	397943	375	35.0425	586.612	4.06523	hypothetical protein	5e-05
CC1G_10427	497911	4968	4.14028	9.36759	1.17795	hypothetical protein	5e-05
CC1G_10428	449563	1472	10.4709	143.038	3.77194	hypothetical protein	5e-05
CC1G_10437	497921	2154	23.1473	9.49786	-1.28517	other/FunK1 protein kinase	5e-05
CC1G_10439	542340	1738	1.75241	0.799888	-1.13147	other/FunK1 protein kinase	0.0083
CC1G_09909	449605	6861	11.4473	3.87776	-1.56171	DNA polymerase epsilon catalytic subunit A	5e-05
CC1G_11798	547414	1779	2.8588	1.22567	-1.22184	hypothetical protein	0.0006
CC1G_08843	478878	939	0.919034	5.09567	2.47108	hypothetical protein	0.0131
CC1G_08861	542441	880	183.493	370.82	1.01499	maternal g10 transcript	5e-05
CC1G_08841	449677	1639	155.682	314.376	1.01389	stomatin family protein	5e-05
CC1G_09727	424407	876	243.588	25.7243	-3.24324	hypothetical protein	5e-05
CC1G_07903	504255	771	35.8356	375.183	3.38813	hypothetical protein	5e-05
CC1G_05948	332489	1758	20.4592	8.26775	-1.30719	ankyrin repeat containing protein	5e-05
CC1G_02251	472409	690	337.789	1198.46	1.82699	hypothetical protein	5e-05
CC1G_03328	263790	1367	6.48793	2.4959	-1.3782	hypothetical protein	5e-05
CC1G_03322	532328	1752	11.7489	1.22217	-3.26501	hypothetical protein	5e-05
CC1G_14263	498112	1758	4.22512	1.59346	-1.40683	hypothetical protein	5e-05
CC1G_14262	263948	1917	4.36776	1.00924	-2.11362	hypothetical protein	5e-05
CC1G_02261	478944	2274	3.63051	1.48482	-1.28989	hypothetical protein	5e-05
CC1G_02250	368707	657	81.3353	460.478	2.50118	hypothetical protein	5e-05
CC1G_03326	498104	3174	15.8983	5.41231	-1.55456	hypothetical protein	5e-05
CC1G_03323	498107	2016	22.1716	7.83032	-1.50157	Cdc6B protein	5e-05
CC1G_09122	264092	758	15.5658	371.231	4.57587	hypothetical protein	5e-05
CC1G_09112	449862	4393	31.7579	9.82914	-1.69198	hypothetical protein	5e-05
CC1G_15297	424634	2079	29.4598	14.6783	-1.00506	CID1p	5e-05
CC1G_03728	449886	1179	222.532	614.655	1.46577	hypothetical protein	5e-05
CC1G_03733	498161	1527	502.945	226.835	-1.14876	hypothetical protein	5e-05
CC1G_02544	449945	1775	23.0423	92.0181	1.99763	sodium-hydrogen antiporter	5e-05
CC1G_02553	498210	1920	35.6207	12.3281	-1.53076	hypothetical protein	5e-05
CC1G_02543	498201	870	3.86861	25.4188	2.71601	hypothetical protein	5e-05
CC1G_01665	449999	1782	89.1958	208.443	1.22461	endo-1,3[4]-beta-glucanase	5e-05
CC1G_01666	268542	2489	4.70794	34.2959	2.86487	hypothetical protein	5e-05
CC1G_01676	357468	1467	23.547	55.0643	1.22557	ammonium transporter	5e-05
CC1G_01729	474886	1105	95.2822	214.14	1.16828	hypothetical protein	5e-05
CC1G_01771	357329	2325	47.6483	12.8371	-1.89211	hypothetical protein	5e-05
CC1G_03771	449989	2953	27.071	65.1385	1.26676	von Willebrand domain-containing protein	5e-05
CC1G_13686	269452	1492	7.9634	19.4022	1.28477	hypothetical protein	5e-05
CC1G_13699	533228	1982	2.21158	9.38193	2.08481	phenylacetyl-CoA ligase	5e-05
CC1G_01789	357316	495	76.1284	36.8198	-1.04795	hypothetical protein	0.0001
CC1G_02836	498221	1416	31.2232	14.0884	-1.14812	hypothetical protein	5e-05
CC1G_02829	472708	570	13.21	4.85099	-1.44528	hypothetical protein	0.0196
CC1G_02817	472717	915	10.3173	21.5222	1.06077	mitochondrial protein	5e-05
CC1G_02802	542645	1654	12.2151	33.4705	1.45423	hypothetical protein	5e-05
CC1G_13566	398785	1417	3.92533	1.75291	-1.16306	CMGC/SRPK protein kinase	0.0011
CC1G_02813	424891	1950	1.33784	41.8911	4.96867	hypothetical protein	5e-05
CC1G_02805	498252	2118	129.27	867.418	2.74634	hypothetical protein	5e-05
CC1G_07713	450208	1276	16.9171	248.736	3.87806	flavoprotein NADH-dependent oxidoreductase	5e-05
CC1G_07710	273741	855	38.1385	88.444	1.21352	hypothetical protein	5e-05
CC1G_07697	498282	1479	103.179	41.6468	-1.30888	hypothetical protein	5e-05
CC1G_07718	273601	1769	463.01	192.976	-1.26263	mannitol-1-phosphate dehydrogenase	5e-05
CC1G_07699	369155	4794	26.5479	88.2472	1.73296	ATP-binding cassette transporter	5e-05
CC1G_07696	472767	585	454.377	135.975	-1.74055	HHE domain-containing protein	5e-05
CC1G_05353	472797	1059	7.47407	75.4233	3.33504	hypothetical protein	5e-05
CC1G_14930	488324	1273	151.838	62.3606	-1.28383	alcohol dehydrogenase	5e-05
CC1G_05087	274633	2193	15.4728	46.3256	1.58207	D-lactate dehydrogenase cytochrome oxidoreductase	5e-05
CC1G_05343	450257	1946	2.75345	0.423732	-2.70002	protein kinase subdomain-containing protein PKL/ccin9	0.0003
CC1G_05356	450279	1715	8.43622	26.0652	1.62746	alginate lyase	5e-05
CC1G_05357	498314	3522	7.12895	1.03269	-2.78728	Na+/H+ exchanger AnNHA1	5e-05
CC1G_05366	450296	2531	33.2217	69.8587	1.07231	hypothetical protein	5e-05
CC1G_11604	369322	810	15.0137	5.46841	-1.45708	hypothetical protein	5e-05
CC1G_11603	275652	847	11.0497	22.4623	1.02349	hypothetical protein	5e-05
CC1G_12969	472834	2124	45.1178	12.2667	-1.87894	hypothetical protein	5e-05
CC1G_15706	450309	737	16.4544	573.643	5.12361	hypothetical protein	5e-05
CC1G_11606	450322	2492	27.9391	13.3952	-1.06056	hypothetical protein	5e-05
CC1G_05320	533614	2224	65.2978	25.6548	-1.34781	g2/mitotic-specific cyclin cdc13	5e-05
CC1G_09092	488379	1119	7.6246	241.965	4.98799	nucleoside-diphosphate-sugar epimerase	5e-05
CC1G_09093	369380	906	25.8307	616.13	4.57607	ergot alkaloid biosynthetic protein A	5e-05
CC1G_10736	479228	1277	8.25839	26.1284	1.66169	hypothetical protein	5e-05
CC1G_10739	460984	951	11.8642	5.10949	-1.21537	hypothetical protein	0.0001
CC1G_10742	542765	1147	35.7888	85.5359	1.25702	glutathione S-transferase	5e-05
CC1G_10743	450380	1432	31.3559	83.331	1.41012	chitin deacetylase	5e-05
CC1G_10750	472886	648	52.1974	8.17539	-2.67462	glutathione S-transferase	5e-05
CC1G_10751	369437	1449	5.72412	2.16231	-1.40448	cytochrome P50	5e-05
CC1G_09094	369425	1155	16.1563	147.461	3.19017	arylalcohol dehydrogenase	5e-05
CC1G_10745	276554	1761	14.0189	35.8064	1.35284	hypothetical protein	5e-05
CC1G_10747	369363	1503	8.97279	20.7258	1.2078	cytochrome P450	5e-05
CC1G_10748	369424	843	6.35756	21.309	1.74492	hypothetical protein	5e-05
CC1G_05519	277435	856	194.004	536.368	1.46713	hypothetical protein	5e-05
CC1G_05509	369481	1506	4.92534	27.0636	2.45806	C-14 sterol reductase	5e-05
CC1G_05520	369533	1743	1.77405	11.2021	2.65865	FAD binding domain-containing protein	5e-05
CC1G_05521	369541	777	28.2254	156.539	2.47145	hypothetical protein	5e-05
CC1G_05525	399209	1569	109.25	52.8858	-1.04668	hypothetical protein	5e-05
CC1G_10695	399221	1095	1.76641	12.8477	2.86262	alternative oxidase	0.00295
CC1G_10077	369589	2364	41.1843	110.215	1.42016	hypothetical protein	5e-05
CC1G_04827	410789	798	7.83761	28.3443	1.85457	hypothetical protein	5e-05
CC1G_08512	461080	858	12.4185	6.07394	-1.03178	hypothetical protein	0.00075
CC1G_08509	498468	1308	11.7799	4.74754	-1.31107	hypothetical protein	5e-05
CC1G_08500	450503	1818	14.8297	6.89102	-1.1057	hypothetical protein	5e-05
CC1G_08612	278642	1930	134.689	22.4728	-2.58338	hypothetical protein	5e-05
CC1G_15213	498486	1761	1.23019	3.79366	1.62471	hypothetical protein	5e-05
CC1G_08523	461075	2688	19.0207	8.086	-1.23408	microtubule motor	5e-05
CC1G_07479	279486	880	10.3043	3.12413	-1.72171	endoglucanase II	0.00025
CC1G_07477	498515	3246	11.8801	3.73286	-1.6702	hypothetical protein	5e-05
CC1G_04916	473020	1491	0.384795	3.04717	2.98531	hypothetical protein	0.01055
CC1G_04921	473023	1242	6.6472	2.42215	-1.45646	hypothetical protein	5e-05
CC1G_04923	399432	2021	1.43849	11.4457	2.99218	FAD/FMN-containing protein	5e-05
CC1G_04937	369807	1302	19.4325	42.3425	1.12363	hypothetical protein	5e-05
CC1G_06563	414471	1269	83.9902	31.6512	-1.40796	exo-beta-1,3-glucanase	5e-05
CC1G_06552	493959	4332	23.398	9.91525	-1.23867	hypothetical protein	5e-05
CC1G_01862	493990	1512	20.4205	7.34719	-1.47475	hypothetical protein	5e-05
CC1G_01847	450685	1053	141.2	371.35	1.39504	E2 ubiquitin-conjugating enzyme	5e-05
CC1G_06589	473048	870	22.5576	59.8403	1.40751	hypothetical protein	5e-05
CC1G_06579	493933	768	5.64789	73.6499	3.7049	acyl-CoA desaturase 1	5e-05
CC1G_06567	474965	2781	10.4456	4.52587	-1.20663	hypothetical protein	5e-05
CC1G_06553	414494	1876	22.2647	111.683	2.32658	DUF89 domain-containing protein	5e-05
CC1G_08739	473193	432	81.1714	169.125	1.05904	hypothetical protein	5e-05
CC1G_08726	425605	1614	0.287521	3.78226	3.71751	beta-glucan synthesis-associated protein KRE6	0.0038
CC1G_08717	488558	2199	2.8843	1.09745	-1.39406	carboxylesterase	0.0001
CC1G_11036	285278	1968	3.27696	16.7071	2.35004	mitochondrial chaperone BCS1	5e-05
CC1G_11035	285312	2083	40.6351	277.896	2.77375	mitochondrial chaperone BCS1	5e-05
CC1G_01527	286075	1356	7.06652	63.3367	3.16397	hypothetical protein	5e-05
CC1G_01525	542970	1564	5.99952	42.0067	2.8077	TAL1	5e-05
CC1G_01523	286131	904	1.378	6.68327	2.27797	hypothetical protein	0.00075
CC1G_01548	425649	2085	2.40822	5.72459	1.2492	pyranose dehydrogenase	5e-05
CC1G_01542	488576	2394	23.7129	50.6607	1.09519	aryl-alcohol oxidase	5e-05
CC1G_01540	450807	1910	0.77985	2.4677	1.6619	pyranose dehydrogenase	0.0026
CC1G_04990	370035	1224	4.86862	1.30045	-1.9045	tetraspanin Tsp2	0.00025
CC1G_05006	473276	1179	53.8391	7.83376	-2.78088	aryl-alcohol dehydrogenase	5e-05
CC1G_03664	473322	819	10.6415	4.8975	-1.11959	hypothetical protein	0.00045
CC1G_03375	479518	1746	8.91627	18.4728	1.05089	hypothetical protein	5e-05
CC1G_03399	535133	1074	14.7699	2.87879	-2.35912	hypothetical protein	5e-05
CC1G_06024	384611	768	18.5036	5.61781	-1.71973	alternative cyclin Pcl12	5e-05
CC1G_09850	498719	390	33.5609	97.8491	1.54378	hypothetical protein	0.0002
CC1G_09837	461475	5289	6.58776	1.67531	-1.97536	hypothetical protein	5e-05
CC1G_05998	488706	1798	1.97993	56.4292	4.83292	laccase 5	5e-05
CC1G_14074	535237	579	40.0183	13.2455	-1.59516	hypothetical protein	5e-05
CC1G_05988	426102	1626	1.97656	0.783954	-1.33415	hypothetical protein	0.00855
CC1G_05981	426118	908	72.0466	35.8239	-1.00801	hypothetical protein	5e-05
CC1G_06007	451005	505	12.655	30.0412	1.24724	hypothetical protein	0.0031
CC1G_06006	461496	1206	7.54115	2.39254	-1.65624	hypothetical protein	5e-05
CC1G_05995	426087	1977	4.41571	0.971997	-2.18362	carboxylesterase	5e-05
CC1G_14811	451104	1212	35.7176	72.5622	1.02259	hypothetical protein	5e-05
CC1G_14809	400163	2020	0.805151	1.64592	1.03156	FAD binding domain-containing protein	0.00495
CC1G_00777	292223	2800	10.028	3.25464	-1.62347	hypothetical protein	5e-05
CC1G_00771	479662	885	228.148	100.678	-1.18022	hypothetical protein	5e-05
CC1G_00769	498847	2637	10.7008	4.23603	-1.33694	origin recognition complex subunit 4	5e-05
CC1G_15732	323571	267	6.96345	22.7956	1.71088	cytochrome P450 monooxygenase pc-1	0.0001
CC1G_11118	437769	1595	10.1982	20.6858	1.02033	hypothetical protein	5e-05
CC1G_15245	371931	171	3.57824	11.5525	1.69088	hypothetical protein	5e-05
CC1G_15245	371911	267	1.33091	3.18739	1.25996	hypothetical protein	0.01245
CC1G_15239	372008	279	15.881	4.21251	-1.91455	hypothetical protein	5e-05
CC1G_07055	28769	930	19.394	45.1437	1.21891	glutathione peroxidase	5e-05
CC1G_06890	41252	1257	75.7622	445.287	2.55518	hypothetical protein	5e-05
CC1G_13759	43563	927	2.46612	20.1993	3.03399	hypothetical protein	5e-05
CC1G_11450	438890	500	309.302	87.5014	-1.82164	hypothetical protein	5e-05
CC1G_14945	374749	885	124.911	48.6472	-1.36047	phosphopantothenoylcysteine decarboxylase	5e-05
CC1G_15614	404624	5132	24.8619	11.6183	-1.09753	p-glycoprotein	5e-05
CC1G_00812	440912	2019	32.3868	11.774	-1.4598	hypothetical protein	5e-05
CC1G_00737	441813	534	139.484	60.7344	-1.19951	hypothetical protein	5e-05
CC1G_07232	111909	1352	404.154	2.43688	-7.37373	hypothetical protein	5e-05
CC1G_07230	432086	3111	1.15306	7.24499	2.65151	nitrate reductase	5e-05
CC1G_00684	113721	1197	4.30582	49.1082	3.5116	CRAL/TRIO domain-containing protein	5e-05
CC1G_06844	120343	1673	21.4279	44.8798	1.06658	arylalcohol dehydrogenase	5e-05
CC1G_03531	125041	2565	9.56225	3.33991	-1.51754	Cap3p	5e-05
CC1G_14805	466738	228	6.24455	2.44207	-1.35449	hypothetical protein	0.0001
CC1G_06180	140785	868	208.384	89.0076	-1.22725	hypothetical protein	5e-05
CC1G_07194	146171	1644	70.9646	203.501	1.51986	epoxide hydrolase	5e-05
CC1G_03796	444228	418	103.976	235.06	1.17678	hypothetical protein	5e-05
CC1G_15413	435561	2300	11.8191	55.9451	2.24289	alcohol dehydrogenase	5e-05
CC1G_01951	355732	1524	173.414	62.7815	-1.46581	hypothetical protein	5e-05
CC1G_12156	477409	1720	12.3735	175.258	3.82415	hypothetical protein	5e-05
CC1G_12371	448067	1354	184.453	61.8346	-1.57677	hypothetical protein	5e-05
CC1G_11176	448083	1117	4.13716	29.4216	2.83016	hypothetical protein	5e-05
CC1G_10867	225748	2122	3.15493	1.4861	-1.08607	hypothetical protein	0.00125
CC1G_12689	225412	1291	137.431	67.3852	-1.02821	hypothetical protein	5e-05
CC1G_14977	226571	1043	229.8	500.364	1.1226	hypothetical protein	5e-05
CC1G_07868	366597	390	6.95166	2.28053	-1.60799	hypothetical protein	5e-05
CC1G_13755	367417	471	54.0425	17.7123	-1.60935	hypothetical protein	5e-05
CC1G_00582	252337	2139	175.174	67.1076	-1.38424	hypothetical protein	5e-05
CC1G_00518	254167	1296	5.14654	118.807	4.52888	hypothetical protein	5e-05
CC1G_02810	472725	669	12.6183	33.3869	1.40376	hypothetical protein	5e-05
CC1G_07700	273960	1878	47.9847	14.0588	-1.7711	hypothetical protein	0.01485
CC1G_04948	450594	1987	38.3347	194.369	2.34207	LAP1	5e-05
CC1G_14379	343394	153	3.61146	40.2568	3.47858	hypothetical protein	5e-05
CC1G_12233	354105	1584	6.96345	22.7956	1.71088	cytochrome P450 52E1	0.0001
CC1G_12017	341385	282	79.596	36.9372	-1.10762	hypothetical protein	0.0152
CC1G_04204	492579	282	13.2149	2.3461	-2.49383	hypothetical protein	0.00025
CC1G_04654	22044	2046	27.8343	10.4156	-1.41812	hypothetical protein	5e-05
CC1G_14086	462466	258	10.1982	20.6858	1.02033	hypothetical protein	5e-05
CC1G_12254	462583	1056	3.57824	11.5525	1.69088	hypothetical protein	5e-05
CC1G_12250	462581	1227	1.33091	3.18739	1.25996	hypothetical protein	0.01245
CC1G_15238	427525	982	15.881	4.21251	-1.91455	hypothetical protein	5e-05
CC1G_10405	507812	1585	12.576	5.73741	-1.1322	hypothetical protein	5e-05
CC1G_06889	499723	3798	75.7622	445.287	2.55518	glutathione transferase omega-1	5e-05
CC1G_13758	367345	1090	2.46612	20.1993	3.03399	hypothetical protein	5e-05
CC1G_11449	438891	680	309.302	87.5014	-1.82164	hypothetical protein	5e-05
CC1G_14944	70529	4454	124.911	48.6472	-1.36047	hypothetical protein	5e-05
CC1G_15615	80619	1031	24.8619	11.6183	-1.09753	hypothetical protein	5e-05
CC1G_00811	545000	2342	32.3868	11.774	-1.4598	hypothetical protein	5e-05
CC1G_04010	87494	2405	58.6328	219.695	1.90572	hypothetical protein	5e-05
CC1G_00737	441812	1122	139.484	60.7344	-1.19951	hypothetical protein	5e-05
CC1G_15756	377077	159	404.154	2.43688	-7.37373	hypothetical protein	5e-05
CC1G_06843	120396	1860	21.4279	44.8798	1.06658	arylalcohol dehydrogenase	5e-05
CC1G_08890	122104	1006	22.1322	9.20653	-1.26542	hypothetical protein	5e-05
CC1G_03532	495447	2037	9.56225	3.33991	-1.51754	hypothetical protein	5e-05
CC1G_14804	476509	1750	6.24455	2.44207	-1.35449	hypothetical protein	0.0001
CC1G_04849	443461	1159	2.19612	0.504085	-2.12322	hypothetical protein	0.00685
CC1G_06181	362383	546	208.384	89.0076	-1.22725	acetate non-utilizing protein 9	5e-05
CC1G_03796	149517	1190	103.976	235.06	1.17678	hypothetical protein	5e-05
CC1G_03893	468826	285	340.393	1014.45	1.57543	hypothetical protein	5e-05
CC1G_06948	364145	1035	30.6677	156.28	2.34935	hypothetical protein	5e-05
CC1G_15414	446127	2048	11.8191	55.9451	2.24289	glucose dehydrogenase short protein	5e-05
CC1G_01952	446284	1460	173.414	62.7815	-1.46581	hypothetical protein	5e-05
CC1G_12159	496475	732	12.3735	175.258	3.82415	carboxypeptidase Y	5e-05
CC1G_10896	503288	213	31.9369	74.1681	1.21558	hypothetical protein	5e-05
CC1G_10755	447300	1263	73.682	156.06	1.08271	hypothetical protein	5e-05
CC1G_11175	470864	1539	4.13716	29.4216	2.83016	hypothetical protein	5e-05
CC1G_10866	497165	846	3.15493	1.4861	-1.08607	hypothetical protein	0.00125
CC1G_12689	448129	3433	137.431	67.3852	-1.02821	hypothetical protein	5e-05
CC1G_14978	226572	1024	229.8	500.364	1.1226	oxidoreductase	5e-05
CC1G_07867	541771	1269	6.95166	2.28053	-1.60799	hypothetical protein	5e-05
CC1G_13754	448945	643	54.0425	17.7123	-1.60935	hemerythrin HHE cation binding domain-containing protein	5e-05
CC1G_13746	471986	1335	175.174	67.1076	-1.38424	hypothetical protein	5e-05
CC1G_00519	413866	696	5.14654	118.807	4.52888	acetyltransferase	5e-05
CC1G_02811	488283	1175	12.6183	33.3869	1.40376	hypothetical protein	5e-05
CC1G_07701	450221	400	47.9847	14.0588	-1.7711	hypothetical protein	0.01485
CC1G_04947	461167	5292	38.3347	194.369	2.34207	hypothetical protein	5e-05
CC1G_01526	425702	939	3.61146	40.2568	3.47858	hypothetical protein	5e-05
CC1G_08598	442572	1560	113.606	275.024	1.27552	G-X-X-X-Q-X-W domain-containing protein	5e-05
CC1G_15144	493420	252	34.1629	74.4994	1.1248	hypothetical protein	0.00055
CC1G_06588	473049	267	6.16418	27.1338	2.13811	hypothetical protein	5e-05
